# Supplementary material for: Can use of healthcare services among 15–16-year-olds predict an increased level of high school dropout? A longitudinal community study
Source: PubMed Central journal article supplement — BMJ Open. 2013 Sep 19;3(9):e003125. doi: 10.1136/bmjopen-2013-003125 (PMC3780314; doi:10.1136/bmjopen-2013-003125), 2013-09-19
Supplement: bmjopen-2013-003125.draft_revisions.pdf [file bmjopen-2013-003125.draft_revisions.pdf]

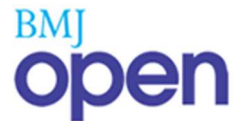

**Can use of health-care services in 15-year-olds predict an increased risk of high school dropout? A longitudinal community study.**

|                                 |                                                                                                                                                                                                                                                                                         |
|---------------------------------|-----------------------------------------------------------------------------------------------------------------------------------------------------------------------------------------------------------------------------------------------------------------------------------------|
| Journal:                        | <i>BMJ Open</i>                                                                                                                                                                                                                                                                         |
| Manuscript ID:                  | bmjopen-2013-003125                                                                                                                                                                                                                                                                     |
| Article Type:                   | Research                                                                                                                                                                                                                                                                                |
| Date Submitted by the Author:   | 25-Apr-2013                                                                                                                                                                                                                                                                             |
| Complete List of Authors:       | Homlong, Lisbeth; Institute of Health and society, University of Oslo, Department of General Practice/Family Medicine<br>Haavet, Ole; Institute of Health and Society, Department of General Practice<br>Rosvold, Elin; Institute of Health and Society, Department of General Practice |
| <b>Primary Subject Heading</b>: | Health services research                                                                                                                                                                                                                                                                |
| Secondary Subject Heading:      | General practice / Family practice, Epidemiology, Public health                                                                                                                                                                                                                         |
| Keywords:                       | EPIDEMIOLOGY, PRIMARY CARE, PUBLIC HEALTH                                                                                                                                                                                                                                               |
|                                 |                                                                                                                                                                                                                                                                                         |

SCHOLARONE™  
Manuscripts

1  
2  
3 **Can use of health-care services in 15-year-olds predict an increased risk of high school**  
4 **dropout? A longitudinal community study.**  
5  
6

7  
8 Lisbeth Homlong, Elin O. Rosvold, Ole R. Haavet  
9

10  
11  
12 Department of General Practice, Institute of Health and Society, P.O. Box 1130, Blindern,  
13

14  
15  
16 N-0318 Oslo, University of Oslo, Norway,  
17

18  
19 Lisbeth Homlong, PhD candidate;  
20

21  
22 Elin O. Rosvold, professor;  
23

24  
25 Ole R. Haavet, associate professor.  
26  
27  
28  
29  
30  
31  
32  
33

34 Corresponding author:  
35

36  
37 Lisbeth Homlong  
38

39  
40 Mail: [lisbeth.homlong@medisin.uio.no](mailto:lisbeth.homlong@medisin.uio.no)  
41  
42  
43  
44  
45

46 **Word count:** 3475  
47  
48  
49  
50  
51

52 **Key words:** Health care seeking behavior; adolescent; student dropouts; primary health care;  
53  
54 general practitioner.  
55  
56  
57  
58  
59  
60

## Article summary

**Can use of health-care services in 15-year-olds predict an increased risk of high school dropout? A longitudinal community study.**

### Article focus

\* To determine if health-care seeking in 15-year-olds is associated with increased risk of high-school dropout five years later.

\* To investigate relationships between health-care-seeking behaviour and health in 15-year-olds and level of high-school dropout five years later.

### Key messages

\* Adolescents who see the child and adolescent mental health services at age 15, have a considerably higher rate of high school dropout, compared to their peers.

\* Adolescents who attend youth health clinics and school health services could be at risk of high school dropout.

\* Boys who attend a GP regularly are less likely to become high school dropouts.

### Strengths and limitations

The results from this study are based on a large community study with a substantial number of participants with a high response rate and few missing data, which is linked to data on high school dropout from the National Education Registry later on. The prospective-longitudinal design gives a higher power compared to a cross-sectional design, since we could observe a temporal order of events on an individual level. The baseline survey was conducted in six Norwegian counties in both urban and rural areas and encompasses the entire youth population in these regions. The adolescent study sample should be representative, therefore, for a general youth population. Furthermore, the compulsory Norwegian registries provided us with complete, reliable follow-up material. The items addressed in the baseline questionnaire have some limitations. The help-seeking variables provide us with no reasons for the adolescents' encounters with the health system. The questions concerning health lack information on the severity or chronicity of conditions. Self-report can also imply an understimation of both health service use and information on health, especially when it comes to use of mental health services and mental health problems.

**ABSTRACT**

**Objectives:** To determine if health-care seeking in 15-year-olds is associated with increased risk of high-school dropout five years later.

**Design:** Longitudinal community study.

**Setting:** Data from a comprehensive youth health survey performed in 2000–2004, linked to data from national registries up to 2010.

**Participants:** 13 964 10th grade secondary school students in six Norwegian counties.

**Main outcome measure:** Logistic regression is used to compute odds ratios for high-school dropout.

**Results:** The total proportion of students not completing high-school five years after registering as students was 29% (girls 24%, boys 34%). Frequent attenders to school health services and the youth health clinic at age 15 had a higher percentage dropout rate (37/48% and 45/71%), compared with those with no use (22/33%) or moderate use (25/40%).

Adolescents referred to mental health services were also more likely to drop out (47/62%).

Boys with moderate use of a general practitioner (GP) had a lower dropout rate (30%).

In a multiple logistic regression analysis, where we adjusted for selected health indicators and sociodemographic background variables, we found that seeking help from the youth health clinic, school health services and consulting child and adolescent mental health services, were associated with an increased risk of high-school dropout five years later. Frequent attenders ( $\geq 4$  contacts) had the highest probability of dropping out. Seeing a GP 1–3 times over the previous year was associated with a lower risk of high-school dropout among boys.

1  
2  
3 **Conclusions:** Adolescents who seek help at certain health-care services can be at risk of  
4 dropping out of high-school later. Health workers should pay particular attention to these  
5 adolescents and offer follow-up when needed. On the other hand, boys who attended a GP  
6 regularly were more likely to continue to high-school graduation, which may indicate a  
7 protective effect of having a regular and stable relationship with a GP.  
8  
9  
10  
11  
12  
13  
14  
15  
16  
17  
18  
19  
20  
21  
22  
23  
24  
25  
26  
27  
28  
29  
30  
31  
32  
33  
34  
35  
36  
37  
38  
39  
40  
41  
42  
43  
44  
45  
46  
47  
48  
49  
50  
51  
52  
53  
54  
55  
56  
57  
58  
59  
60

## INTRODUCTION

Adolescents reporting poor health tend to have an underconsumption of health-care facilities, and a considerable proportion of them seem to have health problems not met by health-care professionals. [1-3] Other studies have suggested that a minority of adolescents with mental health problems seek health-care for this reason. [4, 5] Nevertheless, help-seekers should be considered a vulnerable group. A US study has shown that disturbed adolescents more frequently seek help from professional health-care services than do their non-disturbed peers. [6] Furthermore, adolescent frequent attenders to primary health-care report more physical health complaints, more emotional problems and more days off school than do regular primary health-care attenders. [7]

Poor mental and physical health are among several factors which can influence on health seeking behaviour and an adolescent's ability to graduate from high-school. [8, 9] Although chronic disease in childhood has an impact on educational level and work participation in adult life, [10, 11] less is known about the effects of ill health during adolescent years. [9] An increasing load of mental health problems in young people can play a role, [12, 13] including depressive symptomatology, which several studies have shown to be associated with high-school dropout. [14, 15] In a recent Norwegian study, one out of five high school dropouts reported that they quit because of mental health problems. [16] Previous research indicates that teenage pregnancy and substance abuse are also associated with dropping out. [17 18]

A substantial number of adolescents drop out of high-school, placing themselves at higher risk of marginalisation later in life [8, 19] and generating considerable public attention in recent years. Education is a key to participation in adult work life, and high-school graduation has a strong influence on future health and well-being. [8, 20] A recent Norwegian study has shown that high-school-dropouts are at higher risk than their peers of receiving social security

1  
2  
3 benefits five years later. [21] Previous studies have found a strong association between low  
4  
5 educational level and early receipt of a disability pension. [11, 22]  
6  
7

8 Dropping out of high-school and marginalisation among young adults are fields that must be  
9  
10 approached from different angles. The aim of our study was to determine if use of health-care  
11  
12 services in adolescents could predict an increased risk of high-school dropout in a longitudinal  
13  
14 perspective, by exploring relationships between health-care-seeking behaviour and health in  
15  
16 15-year-olds and level of high-school dropout five years later.  
17  
18  
19  
20  
21  
22  
23  
24  
25  
26  
27  
28  
29  
30  
31  
32  
33  
34  
35  
36  
37  
38  
39  
40  
41  
42  
43  
44  
45  
46  
47  
48  
49  
50  
51  
52  
53  
54  
55  
56  
57  
58  
59  
60

## METHODS

### Population

A large comprehensive health survey of all 10th grade secondary school students (aged 15–16, later referred to as 15-year-olds) in six Norwegian counties, including its capital, Oslo, was conducted between 2000 and 2004. The overall response rate in the studies was 87% (n=15 966). The survey comprised questions about relationships with family, friends and school; physical and mental health; health behaviour; and life events. More detailed information about the health survey is available on the website of the Norwegian Institute of Public Health. [23]

Questionnaire data from the study were linked with data from the National Education Registry and the National Insurance Services (NIS/FD-trygd), compulsory national databases which supply detailed information on the entire cohort up to the year 2010. A precise linkage of records was possible because of the national identification number given to every resident of Norway. After linkage by Statistics Norway, the national identification numbers were removed from the data sets and kept within a safe computer system to secure anonymity for each individual. At baseline, the adolescent contributors to the questionnaires were asked for their consent to link the data from the questionnaires to national registers at a later date; 90% out 15 966 in our baseline population agreed (n=14 062).

From the National Insurance Services we obtained information on participants who were granted an early permanent disability benefit (n=55) during the follow-up period. We excluded those individuals from the study, as a majority were diagnosed with mild to moderate mental retardation, diagnoses within the autistic spectrum; or severe psychiatric disorders like schizophrenia – conditions which were not compatible with high-school graduation.



1  
2  
3 Participants who died (n=43) during follow-up time were also excluded from the analyses,  
4  
5 leaving us with a total study group of n=13 964.  
6  
7

8 Table 1 about here  
9

## 10 **Variables**

### 11 High-school dropout

12  
13 From the National Education registry, we gained information on high-school dropout, which  
14  
15 is the main outcome variable in this paper. In Norway, adolescents normally begin high-  
16  
17 school at age 15–16, immediately after finishing 10th grade, which is the last year of  
18  
19 obligatory schooling in Norway. Students are supposed to complete high-school within three  
20  
21 years. Those who did not graduate within five years after registering as high-school students  
22  
23 were defined for the purposes of this study as high-school-dropouts. [24]  
24  
25  
26  
27  
28  
29  
30  
31

### 32 Use of health-care services

33  
34 In the baseline questionnaires, participants answered questions about help seeking from the  
35  
36 health-care system over the 12 months prior to the survey, whether through school health  
37  
38 services, youth health clinic, general practitioner (GP), child and adolescent mental health  
39  
40 services. The GP, the school health services and the youth health clinic in Norway are  
41  
42 considered low-threshold parts of the primary health-care system, and are all free of charge  
43  
44 for children and adolescents up to the age of 16. The services of child and adolescent mental  
45  
46 health are paid for by the government, but a referral is required from a GP or another  
47  
48 physician. To measure the use of health-care services, the contributors were given three  
49  
50 options – “none”, “1–3” or “4 or more” – for number of contacts during the past year. In our  
51  
52 analyses, we aggregated contacts with the child and adolescent mental health services into  
53  
54  
55  
56  
57  
58  
59  
60

1  
2  
3 two categories: “none” or “1 or more” contacts. The *reason* for visiting any of the service  
4  
5 providers was not registered in the questionnaires.  
6  
7

## 8 Health indicators 9

10  
11 At baseline, adolescents were asked questions concerning their health, including direct  
12  
13 questions on specific conditions. As adjustment variables we used the baseline questions  
14  
15 addressing the adolescents self-perceptions of the status of their general health, if they had or  
16  
17 have had asthma or allergy, and conditions experienced in the 12 months prior to the survey:  
18  
19 serious illness or injury; headache, abdominal pain, neck pain or shoulder pain, back pain or  
20  
21 pain in extremities. The contributors could answer ‘yes’ or ‘no’ to these health and pain  
22  
23 questions. Self-rated health is a health measure which can predict later morbidity, mortality,  
24  
25 health service use and early disability. [25] During adolescence, self-rated health status  
26  
27 appears to be relatively stable, and it seems not to be changed by medical diagnoses or by  
28  
29 mental or somatic health symptoms. [25] Self-rated health is considered to have good  
30  
31 reliability for adults. [26] In the baseline questionnaire, self-rated health was categorised into  
32  
33 four options: ‘bad’, ‘not good’, ‘good’ or ‘very good’. In our analyses, we dichotomised this  
34  
35 variable into two categories: ‘very good or good’ and ‘not good or bad’. We also aggregated  
36  
37 the pain variables into a dichotomous variable, in which three or more pain sites indicated a  
38  
39 positive pain score and two or fewer indicated a negative pain score. We consider widespread  
40  
41 pain to be an independent indicator of ill health. We also know from previous research that  
42  
43 there is a certain comorbidity in adults between depressive disorders and chronic pain. [27]  
44  
45 Level of mental health problems were scored using the HSCL-10, a short-form of the SCL-25,  
46  
47 and an instrument designed to diagnose depression in primary health care. [28] The HSCL-10  
48  
49 includes ten questions about psychological symptoms experienced over the previous week and  
50  
51 is validated for use both in general practice and in epidemiological studies. [29] A sum score  
52  
53 above 1.6 indicates mild, moderate or severe depression among 14–16-year-olds.  
54  
55  
56  
57  
58  
59  
60

### Statistical analyses

Analyses of the data set were performed using multiple logistic regression analysis in SPSS version 19.0, with high-school dropout as the outcome variable. In the crude model, we tested the variables concerning health service use separately and odds ratios were computed for high-school dropout. In the adjusted model, use of health care services were adjusted for each other, for the selected health indicators and for sociodemographic background variables. All analyses were stratified by gender.

## RESULTS

Girls comprised 50.3% of our study group. Descriptive data of the population is presented in Table 1. Missing data caused by skipped questions concerning health status and health-care seeking varied from 1.0% to 5.6%. Follow-up data indicated that 28.9% of the students did not complete high-school within five years (girls 23.8%, boys 34.2%). The descriptive baseline material revealed that 70% of the adolescents attended one or more health-care services over the previous year: school health services (girls 32.4%, boys 16.4%), youth health clinic (girls 21.1, boys 7.8%), GP (girls 59.5, boys 46.5%), child and adolescent mental health services (girls 6.9, boys 3.7%). Girls had substantially more contacts than did boys. A smaller number of the adolescents reported four or more contacts with school health services (girls 4.7, boys 0.9%) and the youth health clinic (girls 3.7, boys 0.6%), whereas 12.1% of the girls and 6.6% of the boys reported multiple contacts with a GP.

With few exceptions, adolescents who reported use of different health care services the past 12 months, generally reported more health problems, compared to those who reported no use of such health services (Table 2). Among frequent attenders ( $\geq 4$  visits), a substantial higher percentage reported health problems compared to those with moderate use of services. This was the case for both girls and boys.

Table 2 about here

As shown in Table 3, a higher rate of high school dropouts were observed among frequent attenders to the school health services (girls 36.5%, boys 48.3%) and the youth health clinic (girls 44.5, boys 71.0%), compared to those with no or moderate use (1–3 visits). Also adolescents referred to the mental health service had a higher dropout rate (girls 47.0, boys 62.0%). Boys with moderate use of a GP, had a lower dropout rate (29.8%).

1  
2  
3 Table 3 about here  
4  
5

6 Table 4 shows that visiting the child and adolescent mental health services at age 15 was  
7  
8 strongly associated with high-school dropout five years later, in both genders (girls' odds ratio  
9  
10 3.18, 95% confidence interval 2.63 to 3.84; boys 3.37, 2.60 to 4.37). Likewise, seeking help at  
11  
12 the youth health clinic (1–3 contacts: girls 1.83, 1.60 to 2.10; boys 1.64, 1.36 to 1.97.  $\geq 4$   
13  
14 contacts: girls 2.37, 1.94 to 3.95; boys 5.02, 2.48 to 10.14). The associations remained  
15  
16 significant after adjustment for use of other health-care services, health indicators and  
17  
18 sociodemographic variables – except for boys with moderate use of the youth health clinic. In  
19  
20 the unadjusted analyses, attending the school health services was associated with dropout (1–  
21  
22 3: girls 1.15, 1.01 to 1.30; boys 1.36, 1.19 to 1.56.  $\geq 4$ : girls 2.02, 1.59 to 2.56; boys 1.93, 1.16  
23  
24 to 3.21).  
25  
26  
27  
28

29 1–3 contacts with the GP the previous year was associated with a lower level of high-school  
30  
31 dropout in boys (0.73, 0.65 to 0.81). Boys who were regular users of a GP also had a  
32  
33 significant lower dropout rate in the adjusted model.  
34  
35  
36

37 Table 4 about here  
38  
39  
40  
41  
42  
43  
44  
45  
46  
47  
48  
49  
50  
51  
52  
53  
54  
55  
56  
57  
58  
59  
60

## DISCUSSION

### Main findings

15-year-olds who attended the youth health clinic and those who saw the child and adolescent mental health services had a considerably higher rate of high-school dropout five years later than did those who did not seek help at these services. We also found that use of the school health services was related to dropout, in both genders, but not after adjustments though. On the other hand, boys who attended a GP regularly were more likely to continue to high-school graduation, which may indicate a protective effect of having a regular and stable relationship with a GP.

### Strengths and weaknesses

The substantial number of participants in geographical diverse areas, along with a high response rate and few missing data constitute strengths of this prospective community study.

The adolescent study sample should be representative, therefore, for a general youth population. Furthermore, the compulsory Norwegian registries provided us with complete, reliable follow-up material. The prospective-longitudinal design provided the opportunity to observe a temporal order of events on an individual level, and it can be argued that the power is stronger compared to that of a cross-sectional design. One should, however, be careful to draw conclusions about causal relationships, given the observational nature of the study.

The baseline survey was conducted in six Norwegian counties in both urban and rural areas and encompasses the entire youth population in these regions. Yet, because local variations in the health-care service accessibility can influence help-seeking behaviour, our results may not be applicable in all settings.

1  
2  
3 One limitation to the questions concerning health, variables which are adjusted for in the  
4 analyses, is the lack of information they provide on the severity or chronicity of  
5 conditions. Furthermore, the help-seeking variables in the baseline survey provide us no  
6 reasons for the adolescents' encounters with the health system. Self-report can also imply an  
7 understimation of health service use, especially when it comes to the mental health services.  
8  
9 Other health problems than those adjusted for in our analyses could also have influenced help-  
10 seeking behaviour and dropout. Yet disability benefits acquired at a young age were  
11 considered to have been the result of the most serious health disabilities, and were therefore  
12 excluded from our sample.  
13  
14

15  
16 A recent validation study confirms that the HSCL-10 instrument, which we have used to  
17 measure mental health problems, is a suitable diagnostic tool in adolescents in this age group,  
18 and is also found to be appropriate for use in epidemiological studies. [29] Although our  
19 cutoff point of 1.6 has been validated as optimal for detecting mild, moderate and severe  
20 depression in 14–16-year-olds of both genders, [29] it can be argued that this cutoff may be  
21 low, and thereby define an unreasonably large proportion of adolescents as depressed.  
22  
23

24  
25 Previous studies have shown, though, that adolescents with a depressive symptom load,  
26 without meeting the diagnostic threshold for a depressive disorder, a so-called 'subsyndromal  
27 depression', can have a persistent functional impairment. [30, 31] Another constraint is no  
28 measure of other types of mental health problems.  
29  
30

31  
32 High-school dropout has been chosen as the outcome variable because it is an early marker  
33 for later work marginalisation and social exclusion. [11, 21, 22] Previous studies indicate that  
34 those who drop out of high-school have a higher risk of becoming dependent on welfare  
35 benefits in adult life, including receipt of an early disability pension. [11, 32, 33] It can be  
36 argued that the five-year limit is strict, but it is consistent with other studies on school  
37  
38  
39  
40  
41  
42  
43  
44  
45  
46  
47  
48  
49  
50  
51  
52  
53  
54  
55  
56  
57  
58  
59  
60

1  
2  
3 dropout, and few of those who fail to complete high-school within five years succeed in  
4  
5 finishing later. [24] Approximately 15% of those who drop out of high-school in Norway are  
6  
7 unemployed or have not registered in any other activity three years later. [19]  
8  
9

### 10 11 **Comparison with previous research** 12 13

14  
15 Health service use in adolescence seems to be a proxy for problems which can be independent  
16  
17 risk factors for dropout. Even though several studies confirms an under-use of health-care  
18  
19 among adolescents who struggle with somatic and mental health issues, [1, 34] both previous  
20  
21 research [7] and the descriptive material in our study shown in Table 2 confirms that help-  
22  
23 seekers constitute a group which generally have a greater load of health problems compared  
24  
25 to non-seekers, and should receive special attention.  
26  
27

28  
29 Both structural and individual factors influence help seeking. [34, 35] From previous research  
30  
31 we know that such sociodemographic characteristics as economic status and parents'  
32  
33 educational level influence both help seeking [2, 7] and high school graduation. [8, 19] Health  
34  
35 complaints which commonly lead adolescents to seek help can also influence dropout. After  
36  
37 correcting for such factors in our analyses, we still found a negative outcome in adolescents  
38  
39 seeking help at the youth health clinic and the mental health services, indicating that they  
40  
41 have other challenges that can explain the higher probability for dropout. On the other hand,  
42  
43 help-seekers may have resources and certain personal qualities that enable them to recognise  
44  
45 and cope with their problems – a characteristic for which we cannot correct in the analyses.  
46  
47  
48

49 [3]  
50

51  
52 Youth health clinics in Norway provide free advice and prescriptions for birth control and  
53  
54 treatment of sexually transmitted diseases. In addition, it is a low-threshold service where  
55  
56 adolescents can consult a nurse or a physician about mental health issues. Visiting the youth  
57  
58  
59  
60



1  
2  
3 health clinic multiple times at 15 years of age can indicate sexual debut at an early age. We  
4  
5 know that adolescent pregnancy is a risk factor for lower educational achievement, [18] but  
6  
7 less is known about early sexual activity in general and high-school dropout. A previous study  
8  
9 has shown associations between low academic achievement and high level of externalising  
10  
11 behaviour and early sexual debut in both genders. [36] A US study on adolescents receiving  
12  
13 mental health treatment shows associations between both externalising and internalising  
14  
15 psychiatric disorders and sexual risk-taking behaviour. [37] To the best of our knowledge,  
16  
17 there is limited research on boys who attend the youth health clinic or similar services, and  
18  
19 there are few boys in our sample with multiple encounters. Those who do, however, have a  
20  
21 dropout rate above 70%. Our results indicate that health workers in youth health clinics  
22  
23 should be aware of and offer follow-up to adolescents with multiple encounters.  
24  
25  
26  
27

28  
29 The Norwegian school health services are located at each local school and are normally run  
30  
31 by a school nurse. Commonly, a consultant GP is also present at a regular basis. The service  
32  
33 can include individual health consultations, as well as group-based health and lifestyle advice.  
34  
35 There are, however, substantial variations among schools and among regions. A recent US  
36  
37 study has found an association between low to moderate use of school-based health centres  
38  
39 and reduction of dropout for high school students. [38] The American school-based health  
40  
41 centres, however, offer a wider range of health services than do school health services in  
42  
43 Norway, and are therefore not directly comparable. Most of previous research on school-  
44  
45 based health services has been conducted outside Scandinavia and is not relevant for the  
46  
47 organisation of the Norwegian system. [39] Our result may indicate, however, that adolescent  
48  
49 frequent attenders to the school health services in Norway represent a vulnerable group, with  
50  
51 lower socioeconomic privilege and with more health problems than non-users, and suggests  
52  
53 that school nurses should be attentive to them.  
54  
55  
56  
57  
58  
59  
60

1  
2  
3 We found that the consulting the child and adolescent mental health services was associated  
4  
5 with a considerably higher rate of school dropout. Because a referral is needed to see the  
6  
7 mental health services, we argue that individuals who qualify for specialised therapy usually  
8  
9 have relatively severe mental health problems. A previous study has shown that there is a  
10  
11 dose-response association between help-seeking for mental health problems and symptom  
12  
13 load of anxiety and depression. [40] Furthermore, early-onset mental disorders have been  
14  
15 shown to be associated with lower educational attainment. [12, 13] It is not surprising, then,  
16  
17 that the outcome in the group consulting mental health services at age 15 is less fortunate.  
18  
19

20  
21 Boys who saw a GP regularly had a lower rate of high-school dropout, although there was no  
22  
23 such statistically significant relationship for girls. This finding suggests that, for boys, having  
24  
25 a stable relationship with a GP in their adolescent years can have a positive impact. Yet  
26  
27 whereas we assume that the boys who use GP services are consulting for health problems and  
28  
29 that they are helped in some way, they may also have individual resources which explain their  
30  
31 better outcomes. Teenage boys have a substantially lower use of health care services than girls  
32  
33 do, including seeing a GP. [41] They are also more reluctant to seek help for emotional  
34  
35 problems [35] unless severely distressed. [42] This situation may have affected our results.  
36  
37  
38  
39

#### 40 **Implications for policy and practice**

41  
42  
43 Previous research confirms that adolescents have frequent encounters with the primary health-  
44  
45 care services every year, [4, 43, 44] which is consistent with our findings. These contacts  
46  
47 provide golden opportunities to uncover somatic health problems and mental distress. Health  
48  
49 workers in the primary health-care services should be aware of teenagers with multiple health  
50  
51 service encounters and offer follow-up when needed. It is also important to refer to the  
52  
53 specialist services when the severity of the condition calls for it. Our results clearly show that  
54  
55  
56  
57  
58  
59  
60

1  
2  
3 when adolescents are referred to second-line mental health services, the condition is well  
4  
5 entrenched and the prognosis is consequently more negative.  
6  
7

8 Youth health clinics are low-threshold services which are visited by a substantial number of  
9  
10 adolescents every year, especially young girls. Considering the high probability of dropout  
11  
12 among attenders of this service, as shown in our study, health workers should be  
13  
14 recommended to focus particularly on these adolescents and the content of their treatment.  
15  
16

17  
18 A paradox is that while girls report a higher level of health service use and more health  
19  
20 problems, they have a considerably lower level of dropout, compared to boys. This calls for a  
21  
22 broader approach concerning the relationship between health and high school dropout. More  
23  
24 research is needed to entangle the role of health services in dealing with adolescent health and  
25  
26 possible preventive potential for adolescents' symptom load and functional impairment in the  
27  
28 following years.  
29  
30  
31  
32  
33  
34  
35  
36  
37  
38  
39  
40  
41  
42  
43  
44  
45  
46  
47  
48  
49  
50  
51  
52  
53  
54  
55  
56  
57  
58  
59  
60

## Acknowledgements

The data collection was carried out and funded by the Norwegian Institute of Public Health in collaboration with the University of Oslo.

We also acknowledge statistician Tore Wentzel-Larsen at the Norwegian Centre for Violence and Traumatic Stress Studies/Centre for Child and Adolescent Mental Health, Eastern and Southern Norway, Oslo, Norway for helping out with preparing the data for analyses.

**Contributors:** All three authors contributed to the study design, discussions of the results and writing of the final paper. LH prepared the data, undertook the primary analyses and the first interpretations and wrote the first draft of the paper. ORH and EOR supervised the analyses and critically reviewed the paper. ORH and EOR also took part in planning and conducting the original baseline survey. All authors approved the submitted version.

**Funding:** The study was funded by the Norwegian Research Council.

**Competing interests:** All authors have completed the Unified Competing Interest form at [www.icmje.org/coi\\_disclosure.pdf](http://www.icmje.org/coi_disclosure.pdf) (available on request from the corresponding author) and declare no competing interests.

**Ethical approval:** The study was approved by the Norwegian Institute of Public Health, Statistics Norway, the Ministry of Education and Research and the Medical Ethics Committee. These institutions gave permission for the use and linkage of the data. The adolescent participants gave a written consent to link their questionnaire data to national registers at a later date.

**Data sharing:** no additional data available.

**Copyright:** The Corresponding Author has the right to grant on behalf of all authors and does grant on behalf of all authors, a worldwide licence to the Publishers and its licensees in perpetuity, in all forms, formats and media (whether known now or created in the future), to i) publish, reproduce, distribute, display and store the Contribution, ii) translate the Contribution into other languages, create adaptations, reprints, include within collections and create summaries, extracts and/or, abstracts of the Contribution, iii) create any other derivative work(s) based on the Contribution, iv) to exploit all subsidiary rights in the Contribution, v) the inclusion of electronic links from the Contribution to third party material where-ever it may be located; and, vi) licence any third party to do any or all of the above.

**WHAT IS ALREADY KNOWN IN THIS TOPIC**

High school dropouts are at risk of later marginalisation.

Poor physical and mental health can influence high school dropout.

Adolescents who use health care services constitute a vulnerable group.

**WHAT THIS STUDY ADDS**

Adolescents who see the child and adolescent mental health services at age 15, have a considerably higher rate of high school dropout, compared to their peers.

Adolescents who attend youth health clinics and school health services could be at risk of high school dropout.

Boys who attend a GP regularly are less likely to become high school dropouts.

Review only

## References

1. Britto MT, Klostermann BK, Bonny AE, et al. Impact of a school-based intervention on access to healthcare for underserved youth. *The Journal of adolescent health: official publication of the Society for Adolescent Medicine* 2001;**29**(2):116-24.
2. Eisenberg D, Golberstein E, Gollust SE. Help-seeking and access to mental health care in a university student population. *Medical care* 2007;**45**(7):594-601 doi: 10.1097/MLR.0b013e31803bb4c1[published Online First: 27 July 2001].
3. Zwaanswijk M, Verhaak PF, Bensing JM, et al. Help seeking for emotional and behavioural problems in children and adolescents: a review of recent literature. *European child & adolescent psychiatry* 2003;**12**(4):153-61 doi: 10.1007/s00787-003-0322-6[published Online First: 16 June 2007].
4. Mauerhofer A, Berchtold A, Michaud PA, et al. GPs' role in the detection of psychological problems of young people: a population-based study. *The British journal of general practice : the journal of the Royal College of General Practitioners* 2009;**59**(566):e308-14 doi: 10.3399/bjgp09X454115[published Online First: 19 September 2009].
5. Flament MF, Cohen D, Choquet M, et al. Phenomenology, psychosocial correlates, and treatment seeking in major depression and dysthymia of adolescence. *Journal of the American Academy of Child and Adolescent Psychiatry* 2001;**40**(9):1070-8 doi: 10.1097/00004583-200109000-00016[published Online First: 15 September 2001].
6. Offer D, Howard KI, Schonert KA, et al. To whom do adolescents turn for help? Differences between disturbed and nondisturbed adolescents. *Journal of the American Academy of Child and Adolescent Psychiatry* 1991;**30**(4):623-30 doi: 10.1097/00004583-199107000-00015[published Online First: 1 July 1991].
7. Vila M, Kramer T, Obiols JE, et al. Adolescents who are frequent attenders to primary care: contribution of psychosocial factors. *Social psychiatry and psychiatric epidemiology* 2010 doi: 10.1007/s00127-010-0326-8[published Online First: 21 December 2010].
8. Freudenberg N, Ruglis J. Reframing school dropout as a public health issue. *Preventing chronic disease* 2007;**4**(4) [published Online First: 19 September 2007].
9. Suhrcke M, de Paz Nieves, C. The impact of health and health behaviours on educational outcomes in high-income countries: a review of the evidence: Copenhagen, WHO Regional Office for Europe, 2011.
10. Maslow GR, Haydon AA, Ford CA, et al. Young adult outcomes of children growing up with chronic illness: an analysis of the National Longitudinal Study of Adolescent Health. *Archives of pediatrics & adolescent medicine* 2011;**165**(3):256-61 doi: 10.1001/archpediatrics.2010.287.
11. Gravseth HM, Bjerkedal T, Irgens LM, et al. Life course determinants for early disability pension: a follow-up of Norwegian men and women born 1967-1976. *European journal of epidemiology* 2007;**22**(8):533-43 doi: 10.1007/s10654-007-9139-9[published Online First: 29 May 2007].
12. Breslau J, Lane M, Sampson N, et al. Mental disorders and subsequent educational attainment in a US national sample. *Journal of psychiatric research* 2008;**42**(9):708-16 doi: 10.1016/j.jpsychires.2008.01.016[published Online First: 12 March 2008].
13. Stoep AV, Weiss NS, Kuo ES, et al. What proportion of failure to complete secondary school in the US population is attributable to adolescent psychiatric disorder? *The journal of behavioral health services & research* 2003;**30**(1):119-24 [published Online First: 14 March 2003].

14. Fletcher JM. Adolescent depression: diagnosis, treatment, and educational attainment. *Health economics* 2008;**17**(11):1215-35 doi: 10.1002/hec.1319[published Online First: 25 December 2007].
15. Needham BL. Adolescent depressive symptomatology and young adult educational attainment: an examination of gender differences. *The Journal of adolescent health : official publication of the Society for Adolescent Medicine* 2009;**45**(2):179-86 doi: 10.1016/j.jadohealth.2008.12.015[published Online First: 25 July 2009].
16. Markussen E, Seland I. Å redusere bortvalg - bare skolens ansvar? En undersøkelse av bortvalg ved de videregående skolene i Akershus fylkeskommune skoleåret 2010-2011. NIFU: Nordic Institute for Studies in Innovation, Research and Education, 2012.
17. Townsend L, Flisher AJ, King G. A systematic review of the relationship between high school dropout and substance use. *Clinical child and family psychology review* 2007;**10**(4):295-317 doi: 10.1007/s10567-007-0023-7.
18. Hofferth SL, Reid L, Mott FL. The effects of early childbearing on schooling over time. *Family planning perspectives* 2001;**33**(6):259-67 [published Online First: 24 January 2001].
19. Bratsberg B, Raaum O, Røed K, et al. Utdannings- og arbeidskarrierer hos unge voksne: Hvor havner ungdom som slutter skolen i ung alder? Frisch Report 3: Ragnar Frisch Centre for Economic Research, 2010.
20. Avendano M, Jurges H, Mackenbach JP. Educational level and changes in health across Europe: longitudinal results from SHARE. *J Eur Soc Policy* 2009;**19**(4):301-16.
21. De Ridder KA, Pape K, Johnsen R, et al. School dropout: a major public health challenge: a 10-year prospective study on medical and non-medical social insurance benefits in young adulthood, the Young-HUNT 1 Study (Norway). *Journal of epidemiology and community health* 2012 doi: 10.1136/jech-2011-200047[published Online First: 9 February 2012].
22. Bruusgaard D, Smeby L, Claussen B. Education and disability pension: a stronger association than previously found. *Scandinavian journal of public health* 2010;**38**(7):686-90 doi: 10.1177/1403494810378916[published Online First: 17 August 2010].
23. [http://www.fhi.no/eway/default.aspx?pid=240&trg=MainContent\\_6898&Main\\_6664=6898:0:25,7898:1:0:0:::0:0&MainContent\\_6898=6706:0:25,8471:1:0:0:::0:0](http://www.fhi.no/eway/default.aspx?pid=240&trg=MainContent_6898&Main_6664=6898:0:25,7898:1:0:0:::0:0&MainContent_6898=6706:0:25,8471:1:0:0:::0:0) (Accessed 9 April 2012).
24. Falch T, Nyhus OH. High school dropout and labour market attachments among young adults. Centre for Economic research: NTNU, 2009.
25. Breidablik HJ, Meland E, Lydersen S. Self-rated health during adolescence: stability and predictors of change (Young-HUNT study, Norway). *European journal of public health* 2009;**19**(1):73-8 doi: 10.1093/eurpub/ckn111.
26. Lundberg O, Manderbacka K. Assessing reliability of a measure of self-rated health. *Scandinavian journal of social medicine* 1996;**24**(3):218-24.
27. Bair MJ, Robinson RL, Katon W, et al. Depression and pain comorbidity: a literature review. *Archives of internal medicine* 2003;**163**(20):2433-45 doi: 10.1001/archinte.163.20.2433.
28. Strand BH, Dalgard OS, Tambs K, et al. Measuring the mental health status of the Norwegian population: a comparison of the instruments SCL-25, SCL-10, SCL-5 and MHI-5 (SF-36). *Nordic journal of psychiatry* 2003;**57**(2):113-8 doi: 10.1080/08039480310000932.
29. Haavet OR, Sirpal MK, Haugen W, et al. Diagnosis of depressed young people in primary health care--a validation of HSCL-10. *Family practice* 2011;**28**(2):233-7 doi: 10.1093/fampra/cm078[published Online First: 13 October 2010].

- 1  
2  
3 30. Angold A, Costello EJ, Farmer EM, et al. Impaired but undiagnosed. *Journal of the*  
4 *American Academy of Child and Adolescent Psychiatry* 1999;**38**(2):129-37 doi:  
5 10.1097/00004583-199902000-00011[published Online First: 10 February 1999].  
6  
7 31. Fergusson DM, Horwood LJ, Ridder EM, et al. Subthreshold depression in adolescence  
8 and mental health outcomes in adulthood. *Archives of general psychiatry*  
9 2005;**62**(1):66-72 doi: 10.1001/archpsyc.62.1.66[published Online First: 5 January  
10 2005].  
11 32. Gjesdal S, Ringdal PR, Haug K, et al. Long-term sickness absence and disability pension  
12 with psychiatric diagnoses: a population-based cohort study. *Nordic journal of*  
13 *psychiatry* 2008;**62**(4):294-301 doi: 10.1080/08039480801984024[published Online  
14 First: 16 July 2008].  
15 33. Wilford J, McMahon AD, Peters J, et al. Predicting job loss in those off sick.  
16 *Occupational medicine* 2008;**58**(2):99-106 doi: 10.1093/occmed/kqm141[published  
17 Online First: 25 January 2008].  
18 34. Zwaanswijk M, Van der Ende J, Verhaak PF, et al. Factors associated with adolescent  
19 mental health service need and utilization. *Journal of the American Academy of Child*  
20 *and Adolescent Psychiatry* 2003;**42**(6):692-700 doi:  
21 10.1097/01.CHI.0000046862.56865.B7[published Online First: 19 August 2003].  
22 35. Barker G, Olukoya A, Aggleton P. Young people, social support and help-seeking.  
23 *International journal of adolescent medicine and health* 2005;**17**(4):315-35 [published  
24 Online First: 1 February 2006].  
25 36. Price MN, Hyde JS. When two isn't better than one: predictors of early sexual activity in  
26 adolescence using a cumulative risk model. *Journal of youth and adolescence*  
27 2009;**38**(8):1059-71 doi: 10.1007/s10964-008-9351-2.  
28 37. Brown LK, Hadley W, Stewart A, et al. Psychiatric disorders and sexual risk among  
29 adolescents in mental health treatment. *Journal of consulting and clinical psychology*  
30 2010;**78**(4):590-7 doi: 10.1037/a0019632[published Online First: 28 July 2010].  
31 38. Kerns SE, Pullmann MD, Walker SC, et al. Adolescent use of school-based health centers  
32 and high school dropout. *Archives of pediatrics & adolescent medicine*  
33 2011;**165**(7):617-23 doi: 10.1001/archpediatrics.2011.10.  
34 39. Dahm KT, Landmark B, Reinart LM. The effects of school health services for children and  
35 young people's health and growing up conditions. *Norwegian Knowledge centre for*  
36 *the Health Services: NOKC*, 2010.  
37 40. Zachrisson HD, Rodje K, Mykletun A. Utilization of health services in relation to mental  
38 health problems in adolescents: a population based survey. *BMC public health*  
39 2006;**6**:34 doi: 10.1186/1471-2458-6-34[published Online First: 17 February 2006].  
40 41. Marcell AV, Klein JD, Fischer I, et al. Male adolescent use of health care services: where  
41 are the boys? *The Journal of adolescent health : official publication of the Society for*  
42 *Adolescent Medicine* 2002;**30**(1):35-43 [published Online First: 5 January 2002].  
43 42. Biddle L, Gunnell D, Sharp D, et al. Factors influencing help seeking in mentally  
44 distressed young adults: a cross-sectional survey. *The British journal of general*  
45 *practice : the journal of the Royal College of General Practitioners* 2004;**54**(501):248-  
46 53 [published Online First: 29 April 2004].  
47 43. Haavet OR, Straand J, Hjordt Dahl P, et al. Do negative life experiences predict the health-  
48 care-seeking of adolescents? A study of 10th-year students in Oslo, Norway. *The*  
49 *Journal of adolescent health : official publication of the Society for Adolescent*  
50 *Medicine* 2005;**37**(2):128-34 doi: 10.1016/j.jadohealth.2004.08.031[published Online  
51 First: 20 July 2005].  
52  
53  
54  
55  
56  
57  
58  
59  
60



- 1  
2  
3 44. Santelli J, Klein J, Graff C, et al. Reliability in adolescent reporting of clinician  
4 counseling, health care use, and health behaviors. *Medical care* 2002;**40**(1):26-37  
5 [published Online First: 19 December 2001].  
6  
7  
8  
9  
10  
11  
12  
13  
14  
15  
16  
17  
18  
19  
20  
21  
22  
23  
24  
25  
26  
27  
28  
29  
30  
31  
32  
33  
34  
35  
36  
37  
38  
39  
40  
41  
42  
43  
44  
45  
46  
47  
48  
49  
50  
51  
52  
53  
54  
55  
56  
57  
58  
59  
60

For peer review only

Table 1 Descriptive characteristics of the population at baseline (2000–2004) and follow-up (2010)

| At baseline<br>(N=13 964):              | N     | %    |
|-----------------------------------------|-------|------|
| <b>Gender</b>                           |       |      |
| Girls                                   | 7019  | 50.3 |
| Boys                                    | 5945  | 49.7 |
| <b>Sociodemographic characteristics</b> |       |      |
| <i>Parents' educational level</i>       |       |      |
| Primary school                          | 1864  | 13.5 |
| High school                             | 5681  | 41.3 |
| College or university degree            | 6214  | 45.2 |
| <i>Parents' marital status</i>          |       |      |
| Married or living together              | 9255  | 66.8 |
| Other                                   | 4600  | 33.2 |
| <i>Household income</i>                 |       |      |
| Very good, good or mediocre             | 13278 | 96.7 |
| Poor                                    | 457   | 3.3  |
| <b>Status at follow-up</b>              |       |      |
| <i>High school drop-out</i>             |       |      |
| Total                                   | 4040  | 28.9 |
| Girls                                   | 1668  | 23.8 |
| Boys                                    | 2372  | 34.2 |

Table 2: Percentage of 15-year-olds reporting different health problems within type and level of reported health care use, all numbers stratified by gender (N=13964)

|                                                    | Asthma     |            | Allergy     |             | Poor self-perceived health |           | Experienced serious illness/injury past 12 months |            | Pain sites $\geq 3$ past 12 months |             | HSCL10 $\geq 1.6$ |            |
|----------------------------------------------------|------------|------------|-------------|-------------|----------------------------|-----------|---------------------------------------------------|------------|------------------------------------|-------------|-------------------|------------|
|                                                    | Girls      | Boys       | Girls       | Boys        | Girls                      | Boys      | Girls                                             | Boys       | Girls                              | Boys        | Girls             | Boys       |
| <b>Overall numbers</b>                             | 910 (13.7) | 897 (13.5) | 2756 (41.0) | 2448 (36.5) | 960 (13.9)                 | 645 (9.4) | 606 (9.2)                                         | 651 (9.9)  | 2683 (40.4)                        | 1473 (22.3) | 2390 (35.2)       | 906 (13.4) |
| <b>Self-reported level of health care use</b>      |            |            |             |             |                            |           |                                                   |            |                                    |             |                   |            |
| <b>School health services</b>                      |            |            |             |             |                            |           |                                                   |            |                                    |             |                   |            |
| No                                                 | 565 (12.7) | 726 (13.2) | 1758(39.1)  | 2008 (36.1) | 556 (12.1)                 | 492 (8.7) | 351 (8.0)                                         | 498 (9.1)  | 1555 (35.0)                        | 1135 (20.7) | 1415 (31.1)       | 688 (12.2) |
| 1-3                                                | 270 (15.0) | 150 (14.8) | 821 (44.8)  | 398 (38.8)  | 296 (15.7)                 | 132(12.5) | 189 (10.6)                                        | 133 (13.3) | 894 (48.8)                         | 298 (29.7)  | 750 (40.3)        | 194 (18.9) |
| $\geq 4$                                           | 63 (20.7)  | 8 (13.3)   | 150 (48.1)  | 20 (35.1)   | 86 (26.8)                  | 10 (16.7) | 54 (17.9)                                         | 11 (19.3)  | 201 (65.3)                         | 24 (41.4)   | 200 (63.3)        | 22 (36.7)  |
| <b>Youth health clinic</b>                         |            |            |             |             |                            |           |                                                   |            |                                    |             |                   |            |
| No                                                 | 671 (12.8) | 796 (13.1) | 2093 (39.6) | 2214 (36.2) | 679 (12.6)                 | 553 (8.8) | 433 (8.3)                                         | 567 (9.4)  | 1922 (36.8)                        | 1289 (21.3) | 1709 (32.1)       | 786 (12.7) |
| 1-3                                                | 183 (16.3) | 79 (16.9)  | 533 (46.5)  | 191 (40.6)  | 201 (16.9)                 | 70 (14.4) | 138 (12.5)                                        | 68 (14.8)  | 591 (51.8)                         | 150 (32.3)  | 524 (44.7)        | 103 (21.5) |
| $\geq 4$                                           | 49 (20.3)  | 5 (13.5)   | 114 (46.5)  | 11 (30.6)   | 67 (26.4)                  | 7 (18.4)  | 34 (14.3)                                         | 7 (19.4)   | 150 (61.7)                         | 13 (36.1)   | 146 (57.9)        | 12 (33.3)  |
| <b>General practitioner</b>                        |            |            |             |             |                            |           |                                                   |            |                                    |             |                   |            |
| No                                                 | 237 (8.8)  | 365 (10.4) | 870 (32.2)  | 1128 (31.9) | 258 (9.3)                  | 301 (8.3) | 108 (4.1)                                         | 192 (5.5)  | 805 (30.2)                         | 605 (17.3)  | 796 (29.2)        | 437 (12.2) |
| 1-3                                                | 485 (15.6) | 410 (15.6) | 1413 (44.8) | 1074 (40.7) | 466 (14.4)                 | 255 (9.4) | 284 (9.2)                                         | 314 (12.0) | 1377 (44.0)                        | 680 (26.1)  | 1155 (36.3)       | 373 (13.9) |
| $\geq 4$                                           | 178 (22.8) | 105 (24.4) | 450 (56.2)  | 208 (47.5)  | 223 (27.1)                 | 73 (16.2) | 211 (27.4)                                        | 137 (32.2) | 480 (60.2)                         | 163 (38.6)  | 422 (51.7)        | 90 (20.4)  |
| <b>Child and adolescent mental health services</b> |            |            |             |             |                            |           |                                                   |            |                                    |             |                   |            |
| No                                                 | 810 (13.2) | 834 (13.2) | 2499 (40.3) | 2323 (36.3) | 793 (12.5)                 | 584 (8.9) | 525 (8.6)                                         | 601 (9.6)  | 2383(38.8)                         | 2655 (21.6) | 2046 (32.6)       | 803 (12.4) |
| $\geq 1$                                           | 87 (19.5)  | 47 (19.5)  | 238 (51.7)  | 96 (39.8)   | 147 (31.5)                 | 46 (18.5) | 76 (17.7)                                         | 43 (18.5)  | 272 (60.0)                         | 90 (37.5)   | 323 (69.5)        | 96 (40.5)  |

Table 3: Health and health care seeking behaviour in 15-year-olds and percentage of high school dropout 5 years later (N=13 964)

|                                               |                                  | Girls       |           | Boys        |           |
|-----------------------------------------------|----------------------------------|-------------|-----------|-------------|-----------|
|                                               |                                  | N(%)        | Dropout % | N(%)        | Dropout % |
| <b>Self-reported level of health care use</b> |                                  |             |           |             |           |
| School health services                        | <i>No</i>                        | 4690 (67.7) | 22.2      | 5728 (83.6) | 32.7      |
|                                               | <i>1-3</i>                       | 1917 (27.7) | 24.6      | 1064 (15.5) | 39.8      |
|                                               | $\geq 4$                         | 323 (4.7)   | 36.5      | 60 (0.9)    | 48.3      |
| Youth health clinic                           | <i>No</i>                        | 5496 (79.0) | 20.8      | 6314 (92.3) | 32.8      |
|                                               | <i>1-3</i>                       | 1209 (17.4) | 32.4      | 490 (7.2)   | 44.5      |
|                                               | $\geq 4$                         | 256 (3.7)   | 44.5      | 38 (0.6)    | 71.1      |
| General practitioner                          | <i>No</i>                        | 2808 (40.5) | 23.4      | 3653 (53.4) | 36.8      |
|                                               | <i>1-3</i>                       | 3289 (47.4) | 22.5      | 2729 (39.9) | 29.8      |
|                                               | $\geq 4$                         | 841 (12.1)  | 27.8      | 453 (6.6)   | 36.0      |
| Child and adolescent mental health services   | <i>No</i>                        | 6463 (93.1) | 21.8      | 6590 (96.3) | 32.8      |
|                                               | $\geq 1$                         | 477 (6.9)   | 47.0      | 251 (3.7)   | 62.2      |
| <b>Health indicators</b>                      |                                  |             |           |             |           |
| Asthma                                        | <i>No</i>                        | 5730 (86.3) | 23.1      | 5753 (86.5) | 33.3      |
|                                               | <i>Yes</i>                       | 910 (13.7)  | 27.1      | 897 (13.5)  | 37.9      |
| Allergy                                       | <i>No</i>                        | 3958 (59.0) | 21.9      | 4261 (63.5) | 33.5      |
|                                               | <i>Yes</i>                       | 2756 (41.0) | 25.9      | 2448 (36.5) | 34.4      |
| Self-perceived health                         | <i>Very good/good</i>            | 5932 (86.1) | 21.8      | 6227 (90.6) | 32.8      |
|                                               | <i>Not good/poor</i>             | 960 (13.9)  | 36.8      | 645 (9.4)   | 46.8      |
| Serious illness/injury past 12 months         | <i>No</i>                        | 5956 (90.8) | 23.1      | 5929 (90.1) | 33.4      |
|                                               | <i>Yes</i>                       | 606 (9.2)   | 24.2      | 651 (9.9)   | 37.2      |
| Pain sites reported past 12 months            | $< 3$                            | 3917 (59.6) | 19.6      | 5107 (77.7) | 31.6      |
|                                               | $\geq 3$                         | 2463 (40.4) | 28.7      | 1385 (22.3) | 40.9      |
| HSCL10                                        | $< 1.6$                          | 4391 (64.8) | 19.3      | 5848 (86.6) | 31.8      |
|                                               | $\geq 1.6$                       | 2390 (35.2) | 30.5      | 906 (13.4)  | 45.7      |
| <b>Sociodemo-graphic variables</b>            |                                  |             |           |             |           |
| Parents' marital status                       | <i>Married/living together</i>   | 4655 (66.6) | 18.4      | 4600 (67.0) | 28.8      |
|                                               | <i>Other</i>                     | 2335 (33.4) | 34.2      | 2265 (33.0) | 44.1      |
| Household income                              | <i>Very good/good/ mediocre</i>  | 6662 (96.4) | 22.8      | 6616 (97.0) | 33.3      |
|                                               | <i>Poor</i>                      | 250 (3.6)   | 45.6      | 207 (3.0)   | 48.3      |
| Parents' educational level                    | <i>College/university degree</i> | 3136 (45.3) | 12.2      | 3078 (45.0) | 20.7      |
|                                               | <i>High school</i>               | 2867 (41.4) | 29.1      | 2814 (41.1) | 39.5      |
|                                               | <i>Primary school</i>            | 915 (13.2)  | 44.3      | 949 (13.9)  | 59.1      |

1  
2  
3  
4  
5  
6  
7  
8  
9  
10  
11  
12  
13  
14  
15  
16  
17  
18  
19  
20  
21  
22  
23  
24  
25  
26  
27  
28  
29  
30  
31  
32  
33  
34  
35  
36  
37  
38  
39  
40  
41  
42  
43  
44  
45  
46  
47  
48  
49  
50  
51  
52  
53  
54  
55  
56  
57  
58  
59  
60

For peer review only

Table 4: Associations between health care seeking behaviour evaluated in 10<sup>th</sup> grade adolescents and high school drop-out five years later. Investigated using multiple logistic regression analysis. Associations expressed in odds ratios (OR) with 95% confidence intervals (CI).

| Self-reported level of health care use      |                   | Crude                         |                                | Adjusted†                     |                               |
|---------------------------------------------|-------------------|-------------------------------|--------------------------------|-------------------------------|-------------------------------|
|                                             |                   | Girls                         | Boys                           | Girls                         | Boys                          |
|                                             |                   | OR (95% CI)                   | OR (95% CI)                    | OR (95% CI)                   | OR (95% CI)                   |
| School health services                      | <i>None (ref)</i> |                               |                                |                               |                               |
|                                             | 1-3               | <b>1.15 (1.01 to 1.30)*</b>   | <b>1.36 (1.19 to 1.56)***</b>  | 0.84 (0.72 to 0.99)           | 1.16 (0.98 to 1.37)           |
|                                             | ≥4                | <b>2.02 (1.59 to 2.56)***</b> | <b>1.93 (1.16 to 3.21)*</b>    | 0.88 (0.65 to 1.19)           | 0.77 (0.40 to 1.47)           |
| Youth health clinic                         | <i>None (ref)</i> |                               |                                |                               |                               |
|                                             | 1-3               | <b>1.83 (1.60 to 2.10)***</b> | <b>1.64 (1.36 to 1.97)***</b>  | <b>1.72 (1.45 to 2.05)***</b> | 1.19 (0.94 to 1.49)           |
|                                             | ≥4                | <b>2.37 (1.94 to 3.95)***</b> | <b>5.02 (2.48 to 10.14)***</b> | <b>1.97 (1.44 to 2.71)***</b> | <b>2.80 (1.26 to 6.21)*</b>   |
| General practitioner                        | <i>None (ref)</i> |                               |                                |                               |                               |
|                                             | 1-3               | 0.95 (0.84 to 1.07)           | <b>0.73 (0.65 to 0.81)***</b>  | 0.85 (0.73 to 0.99)           | <b>0.69 (0.61 to 0.78)***</b> |
|                                             | ≥4                | <b>1.26 (1.06 to 1.50)**</b>  | 0.96 (0.79 to 1.18)            | 0.83 (0.66 to 1.05)           | 0.85 (0.66 to 1.09)           |
| Child and adolescent mental health services | <i>No (ref)</i>   |                               |                                |                               |                               |
|                                             | ≥1                | <b>3.18 (2.63 to 3.84)***</b> | <b>3.37 (2.60 to 4.37)***</b>  | <b>2.05 (1.61 to 2.62)***</b> | <b>2.76 (2.01 to 3.79)**</b>  |

† In the adjusted model use of each health service is adjusted for use of the other health care services, relevant health indicators and sociodemographic variables

\*\*\* significant relationship,  $p \leq 0.001$

\*\* significant relationship,  $p \leq 0.01$

\* significant relationship,  $p \leq 0.05$

1  
2  
3  
4  
5  
6  
7  
8  
9  
10  
11  
12  
13  
14  
15  
16  
17  
18  
19  
20  
21  
22  
23  
24  
25  
26  
27  
28  
29  
30  
31  
32  
33  
34  
35  
36  
37  
38  
39  
40  
41  
42  
43  
44  
45  
46  
47  
48  
49  
50  
51  
52  
53  
54  
55  
56  
57  
58  
59  
60

For peer review only

STROBE Statement—Checklist of items that should be included in reports of *cohort studies*

|                              | Item No | Recommendation                                                                                                                                                                                                                                                                                                                                                                                                |
|------------------------------|---------|---------------------------------------------------------------------------------------------------------------------------------------------------------------------------------------------------------------------------------------------------------------------------------------------------------------------------------------------------------------------------------------------------------------|
| <b>Title and abstract</b>    | 1       | (a) Indicate the study's design with a commonly used term in the title or the abstract<br>(b) Provide in the abstract an informative and balanced summary of what was done and what was found                                                                                                                                                                                                                 |
| <b>Introduction</b>          |         |                                                                                                                                                                                                                                                                                                                                                                                                               |
| Background/rationale         | 2       | Explain the scientific background and rationale for the investigation being reported                                                                                                                                                                                                                                                                                                                          |
| Objectives                   | 3       | State specific objectives, including any prespecified hypotheses                                                                                                                                                                                                                                                                                                                                              |
| <b>Methods</b>               |         |                                                                                                                                                                                                                                                                                                                                                                                                               |
| Study design                 | 4       | Present key elements of study design early in the paper                                                                                                                                                                                                                                                                                                                                                       |
| Setting                      | 5       | Describe the setting, locations, and relevant dates, including periods of recruitment, exposure, follow-up, and data collection                                                                                                                                                                                                                                                                               |
| Participants                 | 6       | (a) Give the eligibility criteria, and the sources and methods of selection of participants. Describe methods of follow-up<br>(b) For matched studies, give matching criteria and number of exposed and unexposed                                                                                                                                                                                             |
| Variables                    | 7       | Clearly define all outcomes, exposures, predictors, potential confounders, and effect modifiers. Give diagnostic criteria, if applicable                                                                                                                                                                                                                                                                      |
| Data sources/<br>measurement | 8*      | For each variable of interest, give sources of data and details of methods of assessment (measurement). Describe comparability of assessment methods if there is more than one group                                                                                                                                                                                                                          |
| Bias                         | 9       | Describe any efforts to address potential sources of bias                                                                                                                                                                                                                                                                                                                                                     |
| Study size                   | 10      | Explain how the study size was arrived at                                                                                                                                                                                                                                                                                                                                                                     |
| Quantitative variables       | 11      | Explain how quantitative variables were handled in the analyses. If applicable, describe which groupings were chosen and why                                                                                                                                                                                                                                                                                  |
| Statistical methods          | 12      | (a) Describe all statistical methods, including those used to control for confounding<br>(b) Describe any methods used to examine subgroups and interactions<br>(c) Explain how missing data were addressed<br>(d) If applicable, explain how loss to follow-up was addressed<br>(e) Describe any sensitivity analyses                                                                                        |
| <b>Results</b>               |         |                                                                                                                                                                                                                                                                                                                                                                                                               |
| Participants                 | 13*     | (a) Report numbers of individuals at each stage of study—eg numbers potentially eligible, examined for eligibility, confirmed eligible, included in the study, completing follow-up, and analysed<br>(b) Give reasons for non-participation at each stage<br>(c) Consider use of a flow diagram                                                                                                               |
| Descriptive data             | 14*     | (a) Give characteristics of study participants (eg demographic, clinical, social) and information on exposures and potential confounders<br>(b) Indicate number of participants with missing data for each variable of interest<br>(c) Summarise follow-up time (eg, average and total amount)                                                                                                                |
| Outcome data                 | 15*     | Report numbers of outcome events or summary measures over time                                                                                                                                                                                                                                                                                                                                                |
| Main results                 | 16      | (a) Give unadjusted estimates and, if applicable, confounder-adjusted estimates and their precision (eg, 95% confidence interval). Make clear which confounders were adjusted for and why they were included<br>(b) Report category boundaries when continuous variables were categorized<br>(c) If relevant, consider translating estimates of relative risk into absolute risk for a meaningful time period |



|                          |    |                                                                                                                                                                            |
|--------------------------|----|----------------------------------------------------------------------------------------------------------------------------------------------------------------------------|
| Other analyses           | 17 | Report other analyses done—eg analyses of subgroups and interactions, and sensitivity analyses                                                                             |
| <b>Discussion</b>        |    |                                                                                                                                                                            |
| Key results              | 18 | Summarise key results with reference to study objectives                                                                                                                   |
| Limitations              | 19 | Discuss limitations of the study, taking into account sources of potential bias or imprecision. Discuss both direction and magnitude of any potential bias                 |
| Interpretation           | 20 | Give a cautious overall interpretation of results considering objectives, limitations, multiplicity of analyses, results from similar studies, and other relevant evidence |
| Generalisability         | 21 | Discuss the generalisability (external validity) of the study results                                                                                                      |
| <b>Other information</b> |    |                                                                                                                                                                            |
| Funding                  | 22 | Give the source of funding and the role of the funders for the present study and, if applicable, for the original study on which the present article is based              |

\*Give information separately for exposed and unexposed groups.

**Note:** An Explanation and Elaboration article discusses each checklist item and gives methodological background and published examples of transparent reporting. The STROBE checklist is best used in conjunction with this article (freely available on the Web sites of PLoS Medicine at <http://www.plosmedicine.org/>, Annals of Internal Medicine at <http://www.annals.org/>, and Epidemiology at <http://www.epidem.com/>). Information on the STROBE Initiative is available at <http://www.strobe-statement.org>.

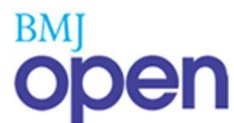

**Can use of health care services in 15–16-year-olds predict an increased level of high school dropout? A longitudinal community study.**

|                                 |                                                                                                                                                                                                                                                                                         |
|---------------------------------|-----------------------------------------------------------------------------------------------------------------------------------------------------------------------------------------------------------------------------------------------------------------------------------------|
| Journal:                        | <i>BMJ Open</i>                                                                                                                                                                                                                                                                         |
| Manuscript ID:                  | bmjopen-2013-003125.R1                                                                                                                                                                                                                                                                  |
| Article Type:                   | Research                                                                                                                                                                                                                                                                                |
| Date Submitted by the Author:   | 01-Jul-2013                                                                                                                                                                                                                                                                             |
| Complete List of Authors:       | Homlong, Lisbeth; Institute of Health and society, University of Oslo, Department of General Practice/Family Medicine<br>Haavet, Ole; Institute of Health and Society, Department of General Practice<br>Rosvold, Elin; Institute of Health and Society, Department of General Practice |
| <b>Primary Subject Heading</b>: | Health services research                                                                                                                                                                                                                                                                |
| Secondary Subject Heading:      | General practice / Family practice, Epidemiology, Public health                                                                                                                                                                                                                         |
| Keywords:                       | EPIDEMIOLOGY, PRIMARY CARE, PUBLIC HEALTH                                                                                                                                                                                                                                               |
|                                 |                                                                                                                                                                                                                                                                                         |

SCHOLARONE™  
Manuscripts

1  
2  
3 **Can use of health care services among 15–16-year-olds predict an increased level of high**  
4  
5 **school dropout? A longitudinal community study.**  
6  
7

8 Lisbeth Homlong, Elin O. Rosvold, Ole R. Haavet  
9

10  
11  
12 Department of General Practice, Institute of Health and Society, P.O. Box 1130, Blindern,  
13

14  
15  
16 N-0318 Oslo, University of Oslo, Norway,  
17

18  
19 Lisbeth Homlong, PhD candidate;  
20

21  
22 Elin O. Rosvold, professor;  
23

24  
25 Ole R. Haavet, associate professor.  
26  
27  
28  
29  
30  
31  
32  
33

34 Corresponding author:  
35

36  
37 Lisbeth Homlong  
38

39  
40 Mail: [lisbeth.homlong@medisin.uio.no](mailto:lisbeth.homlong@medisin.uio.no)  
41  
42  
43  
44  
45

46 **Word count:** 3829  
47  
48  
49  
50  
51

52 **Key words:** Health care seeking behavior; adolescent; student dropouts; primary health care;  
53  
54 general practitioner.  
55  
56  
57  
58  
59  
60

## Article summary

**Can use of health care services among 15–16-year-olds predict an increased level of high school dropout? A longitudinal community study.**

### Article focus

\* To determine if health care seeking among 15–16-year-olds is associated with high school dropout five years later.

\* To investigate the relationship between health care seeking behaviour and health among 15–16-year-olds and level of high school dropout five years later.

### Key messages

\* Adolescents who make contacts with the child and adolescent mental health services at age 15–16, are more likely than their peers to drop out of high school.

\* Adolescents who attend youth health clinics and school health services could be at risk of becoming high school dropouts.

\* Boys who visit a GP regularly are less likely to become high school dropouts.

### Strengths and limitations

The results of this study are based on a large community study with a substantial number of participants, yielding a high response rate and few missing data. The prospective–longitudinal design provides a higher power than does a cross-sectional design, because we were able to observe a temporal order of events on an individual level. The baseline survey was conducted in six Norwegian counties in both urban and rural areas and encompasses the entire youth population in these regions. Thus, the adolescent study sample should be representative for a general youth population. Furthermore, the compulsory Norwegian registries linked to the baseline data provided us with complete, reliable follow-up material. The items addressed in the baseline questionnaire have some limitations, however. The help-seeking variables did not provide us with reasons for the adolescents' encounters with the health system. The questions concerning health lack information on the severity or chronicity of conditions. Self-reports can also engender an underestimation of health service use and incomplete information on health – especially mental health problems and the use of mental health services.

**ABSTRACT**

**Objectives:** To study associations between health care seeking in 15–16-year-olds and high school dropout five years later.

**Design:** Longitudinal community study.

**Setting:** Data from a comprehensive youth health survey conducted in 2000–2004, linked to data from national registries up to 2010.

**Participants:** 13 964 10th grade secondary school students in six Norwegian counties.

**Main outcome measure:** Logistic regression is used to compute odds ratios for high school dropout.

**Results:** The total proportion of students not completing high school five years after registering was 29% (girls 24%, boys 34%). Frequent attenders to school health services and youth health clinics at age 15–16 had a higher dropout rate (37/48% and 45/71%), compared with those with no (22/33%) or moderate use (25/40%). Adolescents referred to mental health services were also more likely to drop out (47/62%). Boys with moderate use of a general practitioner (GP) had a lower dropout rate (30%).

A multiple logistic regression analysis, in which we adjusted for selected health indicators and sociodemographic background variables, revealed that seeking help from the youth health clinic and consulting child and adolescent mental health services, were associated with increased odds of high school dropout five years later. Frequent attenders ( $\geq 4$  contacts) had the highest odds of dropping out. Yet boys who saw a GP 1–3 times over the previous year were less likely than their peers to drop out from high school.

1  
2  
3 **Conclusions:** Adolescents who seek help at certain health care services can be at risk of  
4 dropping out of high school later. Health workers should pay particular attention to frequent  
5 attenders and offer follow-up when needed. On the other hand, boys who attended a GP  
6 regularly were more likely to continue to high school graduation, which may indicate a  
7 protective effect of having a regular and stable relationship with a GP.  
8  
9  
10  
11  
12  
13  
14  
15  
16  
17  
18  
19  
20  
21  
22  
23  
24  
25  
26  
27  
28  
29  
30  
31  
32  
33  
34  
35  
36  
37  
38  
39  
40  
41  
42  
43  
44  
45  
46  
47  
48  
49  
50  
51  
52  
53  
54  
55  
56  
57  
58  
59  
60

## INTRODUCTION

Adolescents reporting poor health tend to have an underconsumption of health care facilities according to their expected needs, and due to this a considerable proportion of them seem to have health problems not met by health care professionals. [1-3] Other studies have suggested that only a minority of adolescents with mental health problems seek health care for these reasons. [4, 5] Nevertheless, help seekers should be considered a vulnerable group. A US study has shown that disturbed adolescents more frequently seek help from professional health care services than do their non-disturbed peers. [6] Furthermore, adolescent frequent attenders to primary health care report more physical health complaints, more emotional problems and more days off school than do regular primary health care attenders. [7]

Poor mental and physical health are among several factors which can have an influence on help seeking behaviour and at adolescents' ability to graduate from high school. [8, 9]

Although chronic disease in childhood has an impact on educational level and work participation in adult life, [10, 11] less is known about the effects of ill health during adolescent years. [9] An increasing load of mental health problems in young people, including depressive symptomatology, can play a role [12, 13] and several studies have shown an association with failure to complete high school. [14, 15] In a recent Norwegian study, one out of five high school dropouts reported that they quit because of mental health problems. [16] Previous research indicates that teenage pregnancy and substance abuse are also associated with dropping out. [17, 18]

A substantial number of adolescents drop out of high school, placing themselves at higher risk of marginalisation later in life [8, 19] and generating considerable public attention in recent years. Norway and several other western countries experience the same challenges. In Norway, adolescents normally enrol in high school at age 15–16, immediately after finishing

1  
2  
3 10th grade, which is the last year of compulsory school. Students are supposed to complete  
4  
5 high school within three years. Those who fail to graduate within five years after registering  
6  
7 as students are defined as high school dropouts. A recent Norwegian study has shown that  
8  
9 high school dropouts are at higher risk than their peers of receiving social security benefits  
10  
11 five years later. [20] Previous studies have found a strong association between low  
12  
13 educational level and early receipt of a disability pension. [11, 21] Education is a key to  
14  
15 participation in adult work life, and high school graduation has a strong influence on future  
16  
17 health and well-being. [8, 22]  
18  
19

20  
21 The concept of marginalisation is often used to describe a process that in a worst case  
22  
23 scenario can end up in permanent exclusion.[23] Dropping out of high school can be a first  
24  
25 step in the process of marginalisation. High school dropout and marginalisation among young  
26  
27 adults are fields that must be approached from different angles. Both individual characteristics  
28  
29 and contextual factors related to family, friends, the community, the schools and the school  
30  
31 system have an influence on dropout.  
32  
33  
34  
35

36 In our study we address the problem from a health-related perspective, by exploring if  
37  
38 adolescents at risk have made contacts with the health services already at age 15–16. Help  
39  
40 seeking behaviour cannot be explored without including health and sociodemographic  
41  
42 background factors. As we consider help seekers a vulnerable group, the aim of our study was  
43  
44 to determine if adolescent help seekers also have increased odds of high school dropout in a  
45  
46 longitudinal perspective. We wanted to investigate this by exploring relationships between  
47  
48 health-care-seeking behaviour and health in 15–16-year-olds and level of high school dropout  
49  
50 five years later.  
51  
52  
53  
54  
55  
56  
57  
58  
59  
60



## METHODS

### Population

A large comprehensive health survey of all 10th grade secondary school students (aged 15–16) in six Norwegian counties, was conducted between 2000 and 2004. The youth survey was initiated in Oslo in 2000 and was extended to include five more counties in the following years 2001–2004. Originally 18 425 10th graders were invited to the baseline studies, while the overall response rate was 87% (n=15 966). The study was organised as a classroom survey, where the pupils filled out a written questionnaire during 2 school hours. An assistant was present to provide information to the participants and administer the questionnaires. Pupils not present at school at the day of the survey were left questionnaires at the schools to be filled out later. Those not responding received a copy by mail to their home address along with a stamped return envelope.

Participation in the survey was voluntary and the pupils signed an informed consent in advance. The survey comprised questions about relationships with family, friends and school; physical and mental health; health behaviour; and life events. [24] More detailed information about the health survey is available on the website of the Norwegian Institute of Public Health. [25]

Questionnaire data from the study were linked to data from the National Education Registry and the National Insurance Services (NIS/FD-trygd), compulsory national databases which supply detailed information on the entire cohort up to the year 2010. A precise linkage of records was possible because of the national identification number given to every resident of Norway. After linkage by Statistics Norway, the national identification numbers were removed from the data sets and kept within a safe computer system to secure anonymity for each individual. At baseline, the adolescent contributors to the questionnaires were asked for

1  
2  
3 their consent to link the data from the questionnaires to national registers at a later date; 90%  
4  
5 of the 15 966 in our baseline population agreed (n=14 062).  
6  
7

8  
9 From the National Insurance Services we obtained information on participants who were  
10  
11 granted an early permanent disability benefit (n=55) during the follow-up period. We  
12  
13 excluded those individuals from the study, as a majority were diagnosed with mild to  
14  
15 moderate mental retardation, diagnoses within the autistic spectrum; or severe psychiatric  
16  
17 disorders like schizophrenia – conditions which were not compatible with high-school  
18  
19 graduation.  
20  
21

22  
23 Participants who died (n=43) during follow-up time were also excluded from the analyses,  
24  
25 leaving us with a total study group of n=13 964.  
26  
27

## 28 **Ethics**

29  
30  
31 The study was approved by the Regional Committee for Medical and Health Research Ethics  
32  
33 and by the Norwegian Data Inspectorate. These institutions gave permission for the use and  
34  
35 linkage of the data. The adolescent participants gave a written consent to link their  
36  
37 questionnaire data to national registers at a later date.  
38  
39

40  
41 Table 1 about here  
42

## 43 **Variables**

44  
45  
46 High-school dropouts  
47  
48

49  
50 From the National Education registry, we gained information on adolescents who had failed  
51  
52 to complete high school, which is the main outcome variable in this paper. In Norway,  
53  
54 adolescents normally enrol in high-school at age 15–16, immediately after finishing 10th  
55  
56 grade, which is the last year of obligatory schooling in Norway. Students are supposed to  
57  
58  
59  
60

1  
2  
3 complete high school within three years. Those who did not graduate within five years after  
4 registering as high-school students were defined for the purposes of this study as high-school-  
5 dropouts. [26]  
6  
7  
8  
9

#### 10 Use of health-care services

11  
12  
13  
14 In the baseline questionnaires, participants answered questions about help seeking from the  
15 health-care system over the 12 months prior to the survey, whether through school health  
16 services, youth health clinic, general practitioner (GP), or child and adolescent mental health  
17 services. The GP, the school health services and the youth health clinic in Norway are  
18 considered low-threshold parts of the primary health-care system, and are all free of charge  
19 for children and adolescents up to the age of 16. The services of child and adolescent mental  
20 health are paid for by the government, but a referral is required from a GP or another  
21 physician. To measure the use of health-care services, the contributors were given three  
22 response options – “none”, “1–3” or “4 or more” – for number of contacts during the past  
23 year. In our analyses, we aggregated contacts with the child and adolescent mental health  
24 services into two categories: “none” or “1 or more” contacts. The *reason* for visiting any of  
25 the service providers was not measured in the questionnaires.  
26  
27  
28  
29  
30  
31  
32  
33  
34  
35  
36  
37  
38  
39  
40  
41

#### 42 Health indicators

43  
44  
45 At baseline, adolescents were asked questions concerning their health, including direct  
46 questions on specific conditions. As adjustment variables we used the baseline questions  
47 addressing the adolescents’ self-perceptions of the status of their general health, if they had or  
48 have had asthma or allergies, and conditions experienced in the 12 months prior to the survey:  
49 serious illness or injury; headache, abdominal pain, neck pain or shoulder pain, back pain or  
50 pain in extremities. The contributors could answer ‘yes’ or ‘no’ to these health and pain  
51  
52  
53  
54  
55  
56  
57  
58  
59  
60

1  
2  
3 questions. Self-rated health is a health measure which can predict later morbidity, mortality,  
4 health service use and early disability. [27] During adolescence, self-rated health status  
5 appears to be relatively stable, and it seems not to be changed by medical diagnoses or by  
6 mental or somatic health symptoms. [27] Self-rated health is considered to have good  
7 reliability for adults. [28] In the baseline questionnaire, self-rated health was categorised into  
8 four options: 'bad', 'not good', 'good' or 'very good'. In our analyses, we dichotomised this  
9 variable into two categories: 'very good or good' and 'not good or bad'. We also aggregated  
10 the pain variables into a dichotomous variable, in which three or more pain sites indicated a  
11 positive pain score and two or fewer indicated a negative pain score. We consider widespread  
12 pain to be an independent indicator of ill health. We also know from previous research that  
13 there is a certain comorbidity in adults between depressive disorders and chronic pain. [29]  
14 Level of mental health problems were scored using the Hopkin's Symptom Checklist-10  
15 (HSCL-10), a short-form of the Hopkin's Symptom Checklist-25 (SCL-25), and an  
16 instrument designed to diagnose depression in primary health care. [30] The HSCL-10  
17 includes ten questions about psychological symptoms experienced over the previous week and  
18 is validated for use both in general practice and in epidemiological studies. [31] A sum score  
19 above 1.6 indicates mild, moderate or severe depression among 14–16-year-olds.

## 20 Sociodemographics

21  
22 The sociodemographic background variables concerning parents' marital situation and  
23 household income were based on self-reports from the baseline questionnaires. The pupils  
24 were asked whether their parents' were 'married/living together'; 'divorced/separated'; 'one  
25 or both dead'; or 'other'. We chose to dichotomise these options into 'married/living together'  
26 or 'other'. The question concerning household income were categorised into 'very good';  
27 'good'; 'mediocre'; or 'poor'. Here we chose to collapse 'very good' and 'good' into one

1  
2  
3 category, which we used as the reference category. Information on parents' educational level  
4  
5 was provided by Statistics Norway. The highest accomplished educational level of one of the  
6  
7 parents was used, leaving us with four categories: 'higher college or university degree' (>4  
8  
9 years); 'lower college or university degree'; 'high school'; or 'primary school'.  
10

### 11 12 13 **Statistical analyses**

14  
15  
16 Analyses of the data set were performed using multiple logistic regression analysis in SPSS  
17  
18 version 19.0, with high-school dropout as the outcome variable. In the crude model, we tested  
19  
20 the variables concerning health service usage separately and odds ratios were computed for  
21  
22 high-school dropout. In the adjusted model, use of health care services were adjusted for each  
23  
24 other, for the selected health indicators and for sociodemographic background variables. All  
25  
26 analyses were stratified by gender.  
27  
28  
29  
30  
31  
32  
33  
34  
35  
36  
37  
38  
39  
40  
41  
42  
43  
44  
45  
46  
47  
48  
49  
50  
51  
52  
53  
54  
55  
56  
57  
58  
59  
60

## RESULTS

Girls comprised 50.3% of our study group. Descriptive data of the population is presented in Table 1. Missing data caused by skipped questions concerning health-care seeking varied from 0.8% to 1.6%, while the questions on health had missing values from 1.1% to 6.5%. Follow-up data indicated that 28.9% of the students did not complete high school within five years (girls 23.8%, boys 34.2%). The descriptive baseline material revealed that 70% of the adolescents attended one or more health-care services over the previous year: school health services (girls 32.4%, boys 16.4%), youth health clinic (girls 21.1, boys 7.8%), GP (girls 59.5, boys 46.5%), child and adolescent mental health services (girls 6.9, boys 3.7%). Girls had substantially more contacts than did boys. A smaller number of the adolescents reported four or more contacts with school health services (girls 4.7, boys 0.9%) and the youth health clinic (girls 3.7, boys 0.6%), whereas 12.1% of the girls and 6.6% of the boys reported multiple contacts with a GP.

With few exceptions, adolescents who reported use of different health care services during the past 12 months, generally reported more health problems, compared to those who reported no use of such health services (Table 2). Among frequent attenders ( $\geq 4$  visits), a substantially higher percentage reported health problems compared to those with moderate use of services. This was the case for both girls and boys.

Table 2 about here

As shown in Table 3, a higher rate of high school dropouts were observed among frequent attenders to the school health services (girls 36.5%, boys 48.3%) and the youth health clinic (girls 44.5, boys 71.1%), compared to those with no or moderate use (1–3 visits). Also adolescents referred to the mental health service had a higher dropout rate (girls 47.0, boys 62.2%). Boys with moderate use of a GP, had a lower dropout rate (29.8%).

1  
2  
3 Table 3 about here  
4  
5

6 Table 4 shows that visiting the child and adolescent mental health services at age 15–16 was  
7  
8 strongly associated with dropping out of high school five years later, in both genders (girls’  
9  
10 odds ratio 3.18, 95% confidence interval 2.63 to 3.84; boys 3.37, 2.60 to 4.37). Likewise,  
11  
12 seeking help at the youth health clinic (1–3 contacts: girls 1.83, 1.60 to 2.10; boys 1.64, 1.36  
13  
14 to 1.97.  $\geq 4$  contacts: girls 3.06, 2.37 to 3.95; boys 5.02, 2.48 to 10.14). The associations  
15  
16 remained significant after adjustment for use of other health care services, health indicators  
17  
18 and sociodemographic variables – except for boys with moderate use of the youth health  
19  
20 clinic. In the unadjusted analyses, attending the school health services was associated with  
21  
22 dropping out of high school (1–3: girls 1.15, 1.01 to 1.30; boys 1.36, 1.19 to 1.56.  $\geq 4$ : girls  
23  
24 2.02, 1.59 to 2.56; boys 1.93, 1.16 to 3.21).  
25  
26  
27  
28

29 Between 1 and 3 contacts with the GP the previous year was associated with a lower level of  
30  
31 high-school dropout in boys (0.73, 0.65 to 0.81). Boys who were regular users of a GP also  
32  
33 had a significant lower dropout rate in the adjusted model.  
34  
35  
36

37 Table 4 about here  
38  
39  
40  
41  
42  
43  
44  
45  
46  
47  
48  
49  
50  
51  
52  
53  
54  
55  
56  
57  
58  
59  
60

## DISCUSSION

### Main findings

Results revealed that 15–16-year-olds who attended the youth health clinic and those who saw the child and adolescent mental health services were significantly more likely to drop out of high school five years later than were those who did not seek help at these services. We also found that use of school health services was related to high school dropout, in both genders, but not after adjustments had been made. On the other hand, boys who attended a GP regularly were more likely to continue to high-school graduation, which may indicate a protective effect of having a regular and stable relationship with a GP.

### Strengths and weaknesses

The substantial number of participants in geographical diverse areas, along with a high response rate and few missing data constitute strengths of this prospective community study.

The adolescent study sample should be representative, therefore, for a general youth population. Furthermore, the compulsory Norwegian registries provided us with complete, reliable follow-up material. The prospective-longitudinal design provided the opportunity to observe a temporal order of events on an individual level, and it can be argued that the power is stronger compared to that of a cross-sectional design. One should be careful, however, not to draw conclusions about causal relationships, given the observational nature of the study.

The baseline survey was conducted in six Norwegian counties in both urban and rural areas and encompasses the entire youth population in these regions. Yet, because local variations in the accessibility of health-care services can influence help-seeking behaviour, our results may not be applicable in all settings.



1  
2  
3 One limitation of the questions concerning health – variables which were adjusted for in the  
4 analyses – is the lack of information they provide on the severity or chronicity of conditions.  
5  
6  
7 Furthermore, the help-seeking variables in the baseline survey provide no reasons for the  
8  
9 adolescents' encounters with the health system. Self-reports can imply an underestimation of  
10  
11 health service usage, especially use of mental health services. Other health problems than  
12  
13 those adjusted for in our analyses could have influenced help-seeking behaviour and failure to  
14  
15 complete high school. Yet disability benefits acquired at a young age were considered to have  
16  
17 been the result of the most serious health disabilities, and were therefore excluded from our  
18  
19 sample.  
20  
21

22  
23  
24 A recent validation study confirms that the HSCL-10 instrument, which we have used to  
25  
26 measure mental health problems, is a suitable diagnostic tool for adolescents in this age  
27  
28 group, and is also found to be appropriate for use in epidemiological studies. [31] Although  
29  
30 our cutoff point of 1.6 has been validated as optimal for detecting mild, moderate and severe  
31  
32 depression in 14–16-year-olds of both genders, [31] it can be argued that this cutoff may be  
33  
34 low, and could thereby define an unreasonably large proportion of adolescents as depressed.  
35  
36 Another constraint is lack of a measure of other types of mental health problems.  
37  
38

39  
40 High-school dropout has been chosen as the outcome variable because it is an early marker  
41  
42 for later work marginalisation and social exclusion. [11, 20, 21] Previous studies indicate that  
43  
44 those who drop out of high school have a higher risk of becoming dependent on welfare  
45  
46 benefits in adult life, including receipt of an early disability pension. [11, 34, 35] It can be  
47  
48 argued that the five-year limit is strict, but it is consistent with other studies on school  
49  
50 dropout, and few of those who fail to complete high school within five years succeed in  
51  
52 finishing later. [26]  
53  
54  
55  
56  
57  
58  
59  
60

### Comparison with previous research

We do not imply that health service use in adolescence causes high-school dropout, rather that it is a proxy for problems which can be independent risk factors for dropout. Even though several studies confirm an under-use of health care among adolescents who struggle with somatic and mental health issues, [1, 36] both previous research [7] and the descriptive material in our study, as shown in Table 2, confirm that help seekers constitute a group which generally have a greater load of health problems compared to non-seekers, and should receive special attention. Both structural and individual factors influence help seeking. [36, 37] From previous research we know that such sociodemographic characteristics as economic status and parents' educational level influence both help seeking [2, 7] and high school graduation. [8, 19] Health complaints which commonly lead adolescents to seek help can also influence them to drop out. After correcting for such factors in our analyses, we found a negative outcome in adolescents seeking help at the youth health clinic and the mental health services, indicating that they have other challenges that can explain their higher probability of dropping out. On the other hand, help seekers may have resources and certain personal qualities that enable them to recognise and cope with their problems – a characteristic for which we cannot correct in the analyses. [3]

Youth health clinics in Norway provide free advice and prescriptions for birth control and treatment of sexually transmitted diseases. In addition, it is a low-threshold service centre where adolescents can consult a nurse or a physician about mental health issues. Visiting the youth health clinic multiple times at 15–16 years of age can indicate sexual debut at an early age. We know that adolescent pregnancy is a risk factor for lower educational achievement, [18] but less is known about early sexual activity in general and failure to complete high school. A previous study has shown associations between low academic achievement and

1  
2  
3 high level of externalising behaviour and early sexual debut in both genders. [38] A US study  
4  
5 on adolescents receiving mental health treatment shows associations between both  
6  
7 externalising and internalising psychiatric disorders and sexual risk-taking behaviour. [39] To  
8  
9 the best of our knowledge, there is limited research on boys who attend the youth health clinic  
10  
11 or similar services, and there are few boys in our sample with multiple encounters. Those who  
12  
13 have multiple encounters, however, have a dropout rate above 70%. Our results indicate that  
14  
15 health workers in youth health clinics should be aware of and offer follow-up to adolescents  
16  
17 with multiple visits.  
18  
19

20  
21 We found that consulting the child and adolescent mental health services was associated with  
22  
23 lower odds for graduating from high school. Because a referral is needed in order to see the  
24  
25 mental health services, we argue that individuals who qualify for specialised therapy usually  
26  
27 have relatively severe mental health problems. A previous study has shown that there is a  
28  
29 dose-response association between help-seeking for mental health problems and symptom  
30  
31 load of anxiety and depression. [42] Furthermore, early-onset mental disorders have been  
32  
33 shown to be associated with lower educational attainment. [12, 13] It is not surprising, then,  
34  
35 that the outcome in the group consulting mental health services at age 15–16 is less fortunate.  
36  
37  
38

39  
40 Boys who saw a GP regularly were more likely to graduate from high school than their peers,  
41  
42 although there was no such statistically significant relationship for girls. This finding suggests  
43  
44 that, for boys, having a stable relationship with a GP in their adolescent years can have a  
45  
46 positive impact. Yet whereas we assume that the boys who use GP services are consulting for  
47  
48 health problems and that they are helped in some way, they may also have individual  
49  
50 resources which explain their better outcomes. Teenage boys have a substantially lower use of  
51  
52 health care services than girls do, including seeing a GP. [43] They are also more reluctant to  
53  
54 seek help for emotional problems [37] unless severely distressed. [44]  
55  
56  
57  
58  
59  
60

### Implications for policy and practice

Previous research confirms that adolescents have frequent encounters with the primary health-care services every year, [4, 45, 46] which is consistent with our findings. These contacts provide golden opportunities to uncover somatic health problems and mental distress. Health workers in the primary health-care services should pay particular attention to adolescents with multiple health service encounters and offer follow-up when needed. It is also important to refer to the specialist services when the severity of the condition calls for it. Our results clearly show that by the time adolescents are referred to second-line mental health services, their conditions are well entrenched and the prognosis is consequently more negative.

Youth health clinics are low-threshold services which are visited by a substantial number of adolescents every year – especially young girls. Considering the high probability of dropping out among attenders of this service, as shown in our study, health workers should be advised to focus particularly on these adolescents and the content of their treatment.

Whereas girls report more health problems and a higher level of health service usage than boys do, they are more likely to graduate from high school – a dilatation that calls for a broader approach to the relationship between health and failure to complete high school. More research is needed to disentangle the role of health services in dealing with adolescent health and possible preventive potential for adolescents' symptom load and functional impairment in the following years.

## Acknowledgements

The data collection was carried out and funded by the Norwegian Institute of Public Health in collaboration with the University of Oslo.

We also acknowledge statistician Tore Wentzel-Larsen at the Norwegian Centre for Violence and Traumatic Stress Studies/Centre for Child and Adolescent Mental Health, Eastern and Southern Norway, Oslo, Norway for helping out with preparing the data for analyses.

**Contributors:** All three authors contributed to the study design, discussions of the results and writing of the final paper. LH prepared the data, undertook the primary analyses and the first interpretations and wrote the first draft of the paper. ORH and EOR supervised the analyses and critically reviewed the paper. ORH and EOR also took part in planning and conducting the original baseline survey. All authors approved the submitted version.

**Funding:** The study was funded by the Norwegian Research Council.

**Competing interests:** All authors have completed the Unified Competing Interest form at [www.icmje.org/coi\\_disclosure.pdf](http://www.icmje.org/coi_disclosure.pdf) (available on request from the corresponding author) and declare no competing interests.

**Ethical approval:** The study was approved by the Norwegian Institute of Public Health, Statistics Norway, the Ministry of Education and Research and the Medical Ethics Committee. These institutions gave permission for the use and linkage of the data. The adolescent participants gave written consent to link their questionnaire data to national registers at a later date.

**Data sharing:** no additional data available.

**Copyright:** The Corresponding Author has the right to grant on behalf of all authors and does grant on behalf of all authors, a worldwide licence to the Publishers and its licensees in perpetuity, in all forms, formats and media (whether known now or created in the future), to i) publish, reproduce, distribute, display and store the Contribution, ii) translate the Contribution into other languages, create adaptations, reprints, include within collections and create summaries, extracts and/or, abstracts of the Contribution, iii) create any other derivative work(s) based on the Contribution, iv) to exploit all subsidiary rights in the Contribution, v) the inclusion of electronic links from the Contribution to third party material where-ever it may be located; and, vi) licence any third party to do any or all of the above.

<http://www.bmj.com/sites/default/files/attachments/resources/2011/07/bmj-author-licence-v-19-march-2012.doc>

**WHAT IS ALREADY KNOWN ON THIS TOPIC**

High school dropouts are at risk of later marginalisation.

Poor physical and mental health **is related to dropping out from** high school.

Adolescents who use health care services constitute a vulnerable group.

**WHAT THIS STUDY ADDS**

Adolescents who see the child and adolescent mental health services at age 15, **are more likely to drop out from** high school, compared to their peers.

Adolescents who attend youth health clinics could be at risk of high school dropout.

Boys who attend a GP regularly are less likely to become highschool dropouts.

Review only

## References

1. Britto MT, Klostermann BK, Bonny AE, et al. Impact of a school-based intervention on access to healthcare for underserved youth. *The Journal of adolescent health : official publication of the Society for Adolescent Medicine* 2001;**29**(2):116-24.
2. Eisenberg D, Golberstein E, Gollust SE. Help-seeking and access to mental health care in a university student population. *Medical care* 2007;**45**(7):594-601 doi: 10.1097/MLR.0b013e31803bb4c1[published Online First: 27 Jul 2001].
3. Zwaanswijk M, Verhaak PF, Bensing JM, et al. Help seeking for emotional and behavioural problems in children and adolescents: a review of recent literature. *European child & adolescent psychiatry* 2003;**12**(4):153-61 doi: 10.1007/s00787-003-0322-6[published Online First: 16 Jun 2007].
4. Mauerhofer A, Berchtold A, Michaud PA, et al. GPs' role in the detection of psychological problems of young people: a population-based study. *The British journal of general practice : the journal of the Royal College of General Practitioners* 2009;**59**(566):e308-14 doi: 10.3399/bjgp09X454115[published Online First: 19 Sept 2009].
5. Flament MF, Cohen D, Choquet M, et al. Phenomenology, psychosocial correlates, and treatment seeking in major depression and dysthymia of adolescence. *Journal of the American Academy of Child and Adolescent Psychiatry* 2001;**40**(9):1070-8 doi: 10.1097/00004583-200109000-00016[published Online First: 15 Sept 2001].
6. Offer D, Howard KI, Schonert KA, et al. To whom do adolescents turn for help? Differences between disturbed and nondisturbed adolescents. *Journal of the American Academy of Child and Adolescent Psychiatry* 1991;**30**(4):623-30 doi: 10.1097/00004583-199107000-00015[published Online First: 1 Jul 1991].
7. Vila M, Kramer T, Obiols JE, et al. Adolescents who are frequent attenders to primary care: contribution of psychosocial factors. *Social psychiatry and psychiatric epidemiology* 2010 doi: 10.1007/s00127-010-0326-8[published Online First: 21 Dec 2010].
8. Freudenberg N, Ruglis J. Reframing school dropout as a public health issue. *Preventing chronic disease* 2007;**4**(4).
9. Suhrcke M, de Paz Nieves, C. The impact of health and health behaviours on educational outcomes in high-income countries: a review of the evidence: Copenhagen, WHO Regional Office for Europe, 2011.
10. Maslow GR, Haydon AA, Ford CA, et al. Young adult outcomes of children growing up with chronic illness: an analysis of the National Longitudinal Study of Adolescent Health. *Archives of pediatrics & adolescent medicine* 2011;**165**(3):256-61 ].
11. Gravseth HM, Bjerkedal T, Irgens LM, et al. Life course determinants for early disability pension: a follow-up of Norwegian men and women born 1967-1976. *European journal of epidemiology* 2007;**22**(8):533-43 doi: 10.1007/s10654-007-9139-9[published Online First: 29 May 2007].
12. Breslau J, Lane M, Sampson N, et al. Mental disorders and subsequent educational attainment in a US national sample. *Journal of psychiatric research* 2008;**42**(9):708-16 doi: 10.1016/j.jpsychires.2008.01.016[published Online First: 12 Mar 2008].
13. Stoep AV, Weiss NS, Kuo ES, et al. What proportion of failure to complete secondary school in the US population is attributable to adolescent psychiatric disorder? *The journal of behavioral health services & research* 2003;**30**(1):119-24.
14. Fletcher JM. Adolescent depression: diagnosis, treatment, and educational attainment. *Health economics* 2008;**17**(11):1215-35 doi: 10.1002/hec.1319[published Online First: 25 Dec 2007].

15. Needham BL. Adolescent depressive symptomatology and young adult educational attainment: an examination of gender differences. *The Journal of adolescent health : official publication of the Society for Adolescent Medicine* 2009;**45**(2):179-86 doi: 10.1016/j.jadohealth.2008.12.015[published Online First: 25 Jul 2009].
16. Markussen E, Seland I. Å redusere bortvalg - bare skolens ansvar? En undersøkelse av bortvalg ved de videregående skolene i Akershus fylkeskommune skoleåret 2010-2011. NIFU: Nordic Institute for Studies in Innovation, Research and Education, 2012.
17. Townsend L, Flisher AJ, King G. A systematic review of the relationship between high school dropout and substance use. *Clinical child and family psychology review* 2007;**10**(4):295-317.
18. Hofferth SL, Reid L, Mott FL. The effects of early childbearing on schooling over time. *Family planning perspectives* 2001;**33**(6):259-67.
19. Bratsberg B, Raaum O, Røed K, et al. Utdannings- og arbeidskarrierer hos unge voksne: Hvor havner ungdom som slutter skolen i ung alder? Frisch Report 3: Ragnar Frisch Centre for Economic Research, 2010.
20. De Ridder KA, Pape K, Johnsen R, et al. School dropout: a major public health challenge: a 10-year prospective study on medical and non-medical social insurance benefits in young adulthood, the Young-HUNT 1 Study (Norway). *Journal of epidemiology and community health* 2012 doi: 10.1136/jech-2011-200047[published Online First: 9 Febr 2012].
21. Bruusgaard D, Smeby L, Claussen B. Education and disability pension: a stronger association than previously found. *Scandinavian journal of public health* 2010;**38**(7):686-90 doi: 10.1177/1403494810378916[published Online First: 20 Aug 2010].
22. Avendano M, Jurgens H, Mackenbach JP. Educational level and changes in health across Europe: longitudinal results from SHARE. *J Eur Soc Policy* 2009;**19**(4):301-16.
23. Geijerstam C. *Tidlig arbeidsledighet og marginalisering*. Contributor, Universitetet i Oslo Økonomisk institutt Ragnar Frisch Centre for Economic Research, 2001.
24. Sjøgaard A, Eide, T. The Oslo Health Study (HUBRO) – The Youth part (UNGHUBRO). Aims, Materials and Methods (online), 2005. Retrieved from <http://www.fhino/dav/AD07555E4Bdoc> (accessed 24 Jun 2013).
25. [http://www.fhi.no/eway/default.aspx?pid=238&trg=MainArea\\_5811&MainArea\\_5811=5895:0:15,4438:1:0:0::0:0](http://www.fhi.no/eway/default.aspx?pid=238&trg=MainArea_5811&MainArea_5811=5895:0:15,4438:1:0:0::0:0) (accessed 9 Apr 2013).
26. Falch T, Nyhus OH. High school dropout and labour market attachments among young adults. Centre for Economic research: NTNU, 2009.
27. Breidablik HJ, Meland E, Lydersen S. Self-rated health during adolescence: stability and predictors of change (Young-HUNT study, Norway). *European journal of public health* 2009;**19**(1):73-8.
28. Lundberg O, Manderbacka K. Assessing reliability of a measure of self-rated health. *Scandinavian journal of social medicine* 1996;**24**(3):218-24.
29. Bair MJ, Robinson RL, Katon W, et al. Depression and pain comorbidity: a literature review. *Archives of internal medicine* 2003;**163**(20):2433-45 ].
30. Strand BH, Dalgard OS, Tambs K, et al. Measuring the mental health status of the Norwegian population: a comparison of the instruments SCL-25, SCL-10, SCL-5 and MHI-5 (SF-36). *Nordic journal of psychiatry* 2003;**57**(2):113-8.
31. Haavet OR, Sirpal MK, Haugen W, et al. Diagnosis of depressed young people in primary health care--a validation of HSCL-10. *Family practice* 2011;**28**(2):233-7 doi: 10.1093/fampra/cmq078[published Online First: 13 Oct 2010].
34. Gjesdal S, Ringdal PR, Haug K, et al. Long-term sickness absence and disability pension with psychiatric diagnoses: a population-based cohort study. *Nordic journal of*



- 1  
2  
3 psychiatry 2008;**62**(4):294-301 doi: 10.1080/08039480801984024[published Online  
4 First: 16 Jul 2008].
- 5 35. Wilford J, McMahon AD, Peters J, et al. Predicting job loss in those off sick.  
6 Occupational medicine 2008;**58**(2):99-106 doi: 10.1093/occmed/kqm141[published  
7 Online First: 25 Jan 2008].
- 8 36. Zwaanswijk M, Van der Ende J, Verhaak PF, et al. Factors associated with adolescent  
9 mental health service need and utilization. Journal of the American Academy of Child  
10 and Adolescent Psychiatry 2003;**42**(6):692-700 doi:  
11 10.1097/01.CHI.0000046862.56865.B7[published Online First: 19 Aug 2003].
- 12 37. Barker G, Olukoya A, Aggleton P. Young people, social support and help-seeking.  
13 International journal of adolescent medicine and health 2005;**17**(4):315-35.
- 14 38. Price MN, Hyde JS. When two isn't better than one: predictors of early sexual activity in  
15 adolescence using a cumulative risk model. Journal of youth and adolescence  
16 2009;**38**(8):1059-71 .
- 17 39. Brown LK, Hadley W, Stewart A, et al. Psychiatric disorders and sexual risk among  
18 adolescents in mental health treatment. Journal of consulting and clinical psychology  
19 2010;**78**(4):590-7 doi: 10.1037/a0019632[published Online First: 28 Jul 2010].
- 20 42. Zachrisson HD, Rodje K, Mykletun A. Utilization of health services in relation to mental  
21 health problems in adolescents: a population based survey. BMC public health  
22 2006;**6**:34 doi: 10.1186/1471-2458-6-34[published Online First: 17 Febr 2006].
- 23 43. Marcell AV, Klein JD, Fischer I, et al. Male adolescent use of health care services: where  
24 are the boys? The Journal of adolescent health : official publication of the Society for  
25 Adolescent Medicine 2002;**30**(1):35-43.
- 26 44. Biddle L, Gunnell D, Sharp D, et al. Factors influencing help seeking in mentally  
27 distressed young adults: a cross-sectional survey. The British journal of general  
28 practice : the journal of the Royal College of General Practitioners 2004;**54**(501):248-  
29 53.
- 30 45. Haavet OR, Straand J, Hjortdahl P, et al. Do negative life experiences predict the health-  
31 care-seeking of adolescents? A study of 10th-year students in Oslo, Norway. The  
32 Journal of adolescent health : official publication of the Society for Adolescent  
33 Medicine 2005;**37**(2):128-34 doi: 10.1016/j.jadohealth.2004.08.031[published Online  
34 First: 20 Jul 2005].
- 35 46. Santelli J, Klein J, Graff C, et al. Reliability in adolescent reporting of clinician  
36 counseling, health care use, and health behaviors. Medical care 2002;**40**(1):26-37.
- 37  
38  
39  
40  
41  
42  
43  
44  
45  
46  
47  
48  
49  
50  
51  
52  
53  
54  
55  
56  
57  
58  
59  
60

1  
2  
3 **Can use of health care services among 15–16-year-olds predict an increased level of high**  
4  
5 **school dropout? A longitudinal community study.**  
6  
7

8 Lisbeth Homlong, Elin O. Rosvold, Ole R. Haavet  
9

10  
11  
12 Department of General Practice, Institute of Health and Society, P.O. Box 1130, Blindern,  
13

14  
15  
16 N-0318 Oslo, University of Oslo, Norway,  
17

18  
19 Lisbeth Homlong, PhD candidate;  
20

21  
22 Elin O. Rosvold, professor;  
23

24  
25 Ole R. Haavet, associate professor.  
26  
27  
28  
29  
30  
31  
32  
33

34 Corresponding author:  
35

36  
37 Lisbeth Homlong  
38

39  
40 Mail: [lisbeth.homlong@medisin.uio.no](mailto:lisbeth.homlong@medisin.uio.no)  
41  
42  
43  
44  
45

46 **Word count: 3829**  
47  
48  
49  
50  
51

52 **Key words:** Health care seeking behavior; adolescent; student dropouts; primary health care;  
53  
54 general practitioner.  
55  
56  
57  
58  
59  
60

## Article summary

Can use of health care services among 15–16-year-olds predict an increased level of high school dropout? A longitudinal community study.

### Article focus

\* To determine if health care seeking among 15–16-year-olds is associated with high school dropout five years later.

\* To investigate the relationship between health care seeking behaviour and health among 15–16-year-olds and level of high school dropout five years later.

### Key messages

\* Adolescents who make contacts with the child and adolescent mental health services at age 15–16, are more likely than their peers to drop out of high school.

\* Adolescents who attend youth health clinics and school health services could be at risk of becoming high school dropouts.

\* Boys who visit a GP regularly are less likely to become high school dropouts.

### Strengths and limitations

The results of this study are based on a large community study with a substantial number of participants, yielding a high response rate and few missing data. The prospective–longitudinal design provides a higher power than does a cross-sectional design, because we were able to observe a temporal order of events on an individual level. The baseline survey was conducted in six Norwegian counties in both urban and rural areas and encompasses the entire youth population in these regions. Thus, the adolescent study sample should be representative for a general youth population. Furthermore, the compulsory Norwegian registries linked to the baseline data provided us with complete, reliable follow-up material. The items addressed in the baseline questionnaire have some limitations, however. The help-seeking variables did not provide us with reasons for the adolescents' encounters with the health system. The questions concerning health lack information on the severity or chronicity of conditions. Self-reports can also engender an underestimation of health service use and incomplete information on health – especially mental health problems and the use of mental health services.

## ABSTRACT

**Objectives:** To study associations between health care seeking in 15–16-year-olds and high school dropout five years later.

**Design:** Longitudinal community study.

**Setting:** Data from a comprehensive youth health survey conducted in 2000–2004, linked to data from national registries up to 2010.

**Participants:** 13 964 10th grade secondary school students in six Norwegian counties.

**Main outcome measure:** Logistic regression is used to compute odds ratios for high school dropout.

**Results:** The total proportion of students not completing high school five years after registering was 29% (girls 24%, boys 34%). Frequent attenders to school health services and youth health clinics at age 15–16 had a higher dropout rate (37/48% and 45/71%), compared with those with no (22/33%) or moderate use (25/40%). Adolescents referred to mental health services were also more likely to drop out (47/62%). Boys with moderate use of a general practitioner (GP) had a lower dropout rate (30%).

A multiple logistic regression analysis, in which we adjusted for selected health indicators and sociodemographic background variables, revealed that seeking help from the youth health clinic and consulting child and adolescent mental health services, were associated with increased odds of high school dropout five years later. Frequent attenders ( $\geq 4$  contacts) had the highest odds of dropping out. Yet boys who saw a GP 1–3 times over the previous year were less likely than their peers to drop out from high school.

1  
2  
3 **Conclusions:** Adolescents who seek help at certain health care services can be at risk of  
4 dropping out of high school later. Health workers should pay particular attention to frequent  
5 attenders and offer follow-up when needed. On the other hand, boys who attended a GP  
6 regularly were more likely to continue to high school graduation, which may indicate a  
7 protective effect of having a regular and stable relationship with a GP.  
8  
9  
10  
11  
12  
13  
14  
15  
16  
17  
18  
19  
20  
21  
22  
23  
24  
25  
26  
27  
28  
29  
30  
31  
32  
33  
34  
35  
36  
37  
38  
39  
40  
41  
42  
43  
44  
45  
46  
47  
48  
49  
50  
51  
52  
53  
54  
55  
56  
57  
58  
59  
60

For peer review only

## INTRODUCTION

Adolescents reporting poor health tend to have an underconsumption of **health care** facilities **according to their expected needs**, and **due to this** a considerable proportion of them seem to have health problems not met by **health care** professionals. [1-3] Other studies have suggested that **only** a minority of adolescents with mental health problems seek health care for **these reasons**. [4, 5] Nevertheless, **help seekers** should be considered a vulnerable group. A US study has shown that disturbed adolescents more frequently seek help from professional **health care** services than do their non-disturbed peers. [6] Furthermore, adolescent frequent attenders to primary **health care** report more physical health complaints, more emotional problems and more days off school than do regular primary health care attenders. [7]

Poor mental and physical health are among several factors which can **have an** influence on **help** seeking behaviour and **at** adolescents' ability to graduate from high school. [8, 9]

Although chronic disease in childhood has an impact on educational level and work participation in adult life, [10, 11] less is known about the effects of ill health during adolescent years. [9] An increasing load of mental health problems in young people, **including depressive symptomatology**, can play a role [12, 13] **and** several studies have shown **an association** with **failure to complete high school**. [14, 15] In a recent Norwegian study, one out of five high school dropouts reported that they quit because of mental health problems. [16] Previous research indicates that teenage pregnancy and substance abuse are also associated with dropping out. [17, 18]

A substantial number of adolescents drop out of **high school**, placing themselves at higher risk of marginalisation later in life [8, 19] and generating considerable public attention in recent years. **Norway and several other western countries experience the same challenges. In Norway, adolescents normally enrol in high school at age 15–16, immediately after finishing**

1  
2  
3 10th grade, which is the last year of compulsory school. Students are supposed to complete  
4 high school within three years. Those who fail to graduate within five years after registering  
5 as students are defined as high school dropouts. A recent Norwegian study has shown that  
6 high school dropouts are at higher risk than their peers of receiving social security benefits  
7 five years later. [20] Previous studies have found a strong association between low  
8 educational level and early receipt of a disability pension. [11, 21] Education is a key to  
9 participation in adult work life, and high school graduation has a strong influence on future  
10 health and well-being. [8, 22]

11  
12  
13  
14  
15  
16  
17  
18  
19  
20  
21  
22 The concept of marginalisation is often used to describe a process that in a worst case  
23 scenario can end up in permanent exclusion.[23] Dropping out of high school can be a first  
24 step in the process of marginalisation. High school dropout and marginalisation among young  
25 adults are fields that must be approached from different angles. Both individual characteristics  
26 and contextual factors related to family, friends, the community, the schools and the school  
27 system have an influence on dropout.

28  
29  
30  
31  
32  
33  
34  
35  
36 In our study we address the problem from a health-related perspective, by exploring if  
37 adolescents at risk have made contacts with the health services already at age 15–16. Help  
38 seeking behaviour cannot be explored without including health and sociodemographic  
39 background factors. As we consider help seekers a vulnerable group, the aim of our study was  
40 to determine if adolescent help seekers also have increased odds of high school dropout in a  
41 longitudinal perspective. We wanted to investigate this by exploring relationships between  
42 health-care-seeking behaviour and health in 15–16-year-olds and level of high school dropout  
43 five years later.  
44  
45  
46  
47  
48  
49  
50  
51  
52  
53  
54  
55  
56  
57  
58  
59  
60

## METHODS

### Population

A large comprehensive health survey of all 10th grade secondary school students (aged 15–16) in six Norwegian counties, was conducted between 2000 and 2004. The youth survey was initiated in Oslo in 2000 and was extended to include five more counties in the following years 2001–2004. Originally 18 425 10th graders were invited to the baseline studies, while the overall response rate was 87% (n=15 966). The study was organised as a classroom survey, where the pupils filled out a written questionnaire during 2 school hours. An assistant was present to provide information to the participants and administer the questionnaires. Pupils not present at school at the day of the survey were left questionnaires at the schools to be filled out later. Those not responding received a copy by mail to their home address along with a stamped return envelope.

Participation in the survey was voluntary and the pupils signed an informed consent in advance. The survey comprised questions about relationships with family, friends and school; physical and mental health; health behaviour; and life events. [24] More detailed information about the health survey is available on the website of the Norwegian Institute of Public Health. [25]

Questionnaire data from the study were linked to data from the National Education Registry and the National Insurance Services (NIS/FD-trygd), compulsory national databases which supply detailed information on the entire cohort up to the year 2010. A precise linkage of records was possible because of the national identification number given to every resident of Norway. After linkage by Statistics Norway, the national identification numbers were removed from the data sets and kept within a safe computer system to secure anonymity for each individual. At baseline, the adolescent contributors to the questionnaires were asked for



1  
2  
3 their consent to link the data from the questionnaires to national registers at a later date; 90%  
4  
5 of the 15 966 in our baseline population agreed (n=14 062).  
6  
7

8 From the National Insurance Services we obtained information on participants who were  
9  
10 granted an early permanent disability benefit (n=55) during the follow-up period. We  
11  
12 excluded those individuals from the study, as a majority were diagnosed with mild to  
13  
14 moderate mental retardation, diagnoses within the autistic spectrum; or severe psychiatric  
15  
16 disorders like schizophrenia – conditions which were not compatible with high-school  
17  
18 graduation.  
19  
20

21  
22  
23 Participants who died (n=43) during follow-up time were also excluded from the analyses,  
24  
25 leaving us with a total study group of n=13 964.  
26  
27

## 28 **Ethics**

29  
30  
31 The study was approved by the Regional Committee for Medical and Health Research Ethics  
32  
33 and by the Norwegian Data Inspectorate. These institutions gave permission for the use and  
34  
35 linkage of the data. The adolescent participants gave a written consent to link their  
36  
37 questionnaire data to national registers at a later date.  
38  
39

40 Table 1 about here  
41  
42

## 43 **Variables**

44  
45  
46 High-school dropouts  
47  
48

49 From the National Education registry, we gained information on adolescents who had failed  
50  
51 to complete high school, which is the main outcome variable in this paper. In Norway,  
52  
53 adolescents normally enrol in high-school at age 15–16, immediately after finishing 10th  
54  
55 grade, which is the last year of obligatory schooling in Norway. Students are supposed to  
56  
57  
58  
59  
60

1  
2  
3 complete **high school** within three years. Those who did not graduate within five years after  
4  
5 registering as high-school students were defined for the purposes of this study as high-school-  
6  
7 dropouts. [26]  
8  
9

#### 10 11 Use of health-care services 12

13  
14 In the baseline questionnaires, participants answered questions about help seeking from the  
15  
16 health-care system over the 12 months prior to the survey, whether through school health  
17  
18 services, youth health clinic, general practitioner (GP), **or** child and adolescent mental health  
19  
20 services. The GP, the school health services and the youth health clinic in Norway are  
21  
22 considered low-threshold parts of the primary health-care system, and are all free of charge  
23  
24 for children and adolescents up to the age of 16. The services of child and adolescent mental  
25  
26 health are paid for by the government, but a referral is required from a GP or another  
27  
28 physician. To measure the use of health-care services, the contributors were given three  
29  
30 **response** options – “none”, “1–3” or “4 or more” – for number of contacts during the past  
31  
32 year. In our analyses, we aggregated contacts with the child and adolescent mental health  
33  
34 services into two categories: “none” or “1 or more” contacts. The *reason* for visiting any of  
35  
36 the service providers was not **measured** in the questionnaires.  
37  
38  
39  
40  
41

#### 42 Health indicators 43

44  
45 At baseline, adolescents were asked questions concerning their health, including direct  
46  
47 questions on specific conditions. As adjustment variables we used the baseline questions  
48  
49 addressing the adolescents’ self-perceptions of the status of their general health, if they had or  
50  
51 have had asthma or **allergies**, and conditions experienced in the 12 months prior to the survey:  
52  
53 serious illness or injury; headache, abdominal pain, neck pain or shoulder pain, back pain or  
54  
55 pain in extremities. The contributors could answer ‘yes’ or ‘no’ to these health and pain  
56  
57  
58  
59  
60

1  
2  
3 questions. Self-rated health is a health measure which can predict later morbidity, mortality,  
4 health service use and early disability. [27] During adolescence, self-rated health status  
5 appears to be relatively stable, and it seems not to be changed by medical diagnoses or by  
6 mental or somatic health symptoms. [27] Self-rated health is considered to have good  
7 reliability for adults. [28] In the baseline questionnaire, self-rated health was categorised into  
8 four options: 'bad', 'not good', 'good' or 'very good'. In our analyses, we dichotomised this  
9 variable into two categories: 'very good or good' and 'not good or bad'. We also aggregated  
10 the pain variables into a dichotomous variable, in which three or more pain sites indicated a  
11 positive pain score and two or fewer indicated a negative pain score. We consider widespread  
12 pain to be an independent indicator of ill health. We also know from previous research that  
13 there is a certain comorbidity in adults between depressive disorders and chronic pain. [29]  
14 Level of mental health problems were scored using the **Hopkin's Symptom Checklist-10**  
15 (HSCL-10), a short-form of the **Hopkin's Symptom Checklist-25** (SCL-25), and an  
16 instrument designed to diagnose depression in primary health care. [30] The HSCL-10  
17 includes ten questions about psychological symptoms experienced over the previous week and  
18 is validated for use both in general practice and in epidemiological studies. [31] A sum score  
19 above 1.6 indicates mild, moderate or severe depression among 14–16-year-olds.

### 20 21 22 23 24 25 26 27 28 29 30 31 32 33 34 35 36 37 38 39 40 41 42 **Sociodemographics**

43  
44  
45 **The sociodemographic background variables concerning parents' marital situation and**  
46 **household income were based on self-reports from the baseline questionnaires. The pupils**  
47 **were asked whether their parents' were 'married/living together'; 'divorced/separated'; 'one**  
48 **or both dead'; or 'other'. We chose to dichotomise these options into 'married/living together'**  
49 **or 'other'. The question concerning household income were categorised into 'very good';**  
50 **'good'; 'mediocre'; or 'poor'. Here we chose to collapse 'very good' and 'good' into one**  
51  
52  
53  
54  
55  
56  
57  
58  
59  
60

1  
2  
3 category, which we used as the reference category. Information on parents' educational level  
4  
5 was provided by Statistics Norway. The highest accomplished educational level of one of the  
6  
7 parents was used, leaving us with four categories: 'higher college or university degree' (>4  
8  
9 years); 'lower college or university degree'; 'high school'; or 'primary school'.  
10

### 11 12 13 **Statistical analyses**

14  
15  
16 Analyses of the data set were performed using multiple logistic regression analysis in SPSS  
17  
18 version 19.0, with high-school dropout as the outcome variable. In the crude model, we tested  
19  
20 the variables concerning health service use separately and odds ratios were computed for  
21  
22 high-school dropout. In the adjusted model, use of health care services were adjusted for each  
23  
24 other, for the selected health indicators and for sociodemographic background variables. All  
25  
26 analyses were stratified by gender.  
27  
28  
29  
30  
31  
32  
33  
34  
35  
36  
37  
38  
39  
40  
41  
42  
43  
44  
45  
46  
47  
48  
49  
50  
51  
52  
53  
54  
55  
56  
57  
58  
59  
60

## RESULTS

Girls comprised 50.3% of our study group. Descriptive data of the population is presented in Table 1. Missing data caused by skipped questions concerning health-care seeking varied from 0.8% to 1.6%, while the questions on health had missing values from 1.1% to 6.5%.

Follow-up data indicated that 28.9% of the students did not complete high school within five years (girls 23.8%, boys 34.2%). The descriptive baseline material revealed that 70% of the adolescents attended one or more health-care services over the previous year: school health services (girls 32.4%, boys 16.4%), youth health clinic (girls 21.1, boys 7.8%), GP (girls 59.5, boys 46.5%), child and adolescent mental health services (girls 6.9, boys 3.7%). Girls had substantially more contacts than did boys. A smaller number of the adolescents reported four or more contacts with school health services (girls 4.7, boys 0.9%) and the youth health clinic (girls 3.7, boys 0.6%), whereas 12.1% of the girls and 6.6% of the boys reported multiple contacts with a GP.

With few exceptions, adolescents who reported use of different health care services during the past 12 months, generally reported more health problems, compared to those who reported no use of such health services (Table 2). Among frequent attenders ( $\geq 4$  visits), a substantially higher percentage reported health problems compared to those with moderate use of services. This was the case for both girls and boys.

Table 2 about here

As shown in Table 3, a higher rate of high school dropouts were observed among frequent attenders to the school health services (girls 36.5%, boys 48.3%) and the youth health clinic (girls 44.5, boys 71.1%), compared to those with no or moderate use (1–3 visits). Also adolescents referred to the mental health service had a higher dropout rate (girls 47.0, boys 62.2%). Boys with moderate use of a GP, had a lower dropout rate (29.8%).

1  
2  
3 Table 3 about here  
4  
5

6 Table 4 shows that visiting the child and adolescent mental health services at age 15–16 was  
7  
8 strongly associated with **dropping out of high school** five years later, in both genders (girls’  
9  
10 odds ratio 3.18, 95% confidence interval 2.63 to 3.84; boys 3.37, 2.60 to 4.37). Likewise,  
11  
12 seeking help at the youth health clinic (1–3 contacts: girls 1.83, 1.60 to 2.10; boys 1.64, 1.36  
13  
14 to 1.97.  $\geq 4$  contacts: girls **3.06, 2.37** to 3.95; boys 5.02, 2.48 to 10.14). The associations  
15  
16 remained significant after adjustment for use of other health care services, health indicators  
17  
18 and sociodemographic variables – except for boys with moderate use of the youth health  
19  
20 clinic. In the unadjusted analyses, attending the school health services was associated **with**  
21  
22 **dropping out of high school** (1–3: girls 1.15, 1.01 to 1.30; boys 1.36, 1.19 to 1.56.  $\geq 4$ : girls  
23  
24 2.02, 1.59 to 2.56; boys 1.93, 1.16 to 3.21).  
25  
26  
27  
28

29 **Between 1 and 3** contacts with the GP the previous year was associated with a lower level of  
30  
31 high-school dropout in boys (0.73, 0.65 to 0.81). Boys who were regular users of a GP also  
32  
33 had a significant lower dropout rate in the adjusted model.  
34  
35  
36

37 Table 4 about here  
38  
39  
40  
41  
42  
43  
44  
45  
46  
47  
48  
49  
50  
51  
52  
53  
54  
55  
56  
57  
58  
59  
60

## DISCUSSION

### Main findings

Results revealed that 15–16-year-olds who attended the youth health clinic and those who saw the child and adolescent mental health services were significantly more likely to drop out of high school five years later than were those who did not seek help at these services. We also found that use of school health services was related to high school dropout, in both genders, but not after adjustments had been made. On the other hand, boys who attended a GP regularly were more likely to continue to high-school graduation, which may indicate a protective effect of having a regular and stable relationship with a GP.

### Strengths and weaknesses

The substantial number of participants in geographical diverse areas, along with a high response rate and few missing data constitute strengths of this prospective community study.

The adolescent study sample should be representative, therefore, for a general youth population. Furthermore, the compulsory Norwegian registries provided us with complete, reliable follow-up material. The prospective-longitudinal design provided the opportunity to observe a temporal order of events on an individual level, and it can be argued that the power is stronger compared to that of a cross-sectional design. One should be careful, however, not to draw conclusions about causal relationships, given the observational nature of the study.

The baseline survey was conducted in six Norwegian counties in both urban and rural areas and encompasses the entire youth population in these regions. Yet, because local variations in the accessibility of health-care services can influence help-seeking behaviour, our results may not be applicable in all settings.

1  
2  
3 One limitation of the questions concerning health – variables which were adjusted for in the  
4 analyses – is the lack of information they provide on the severity or chronicity of conditions.  
5  
6  
7 Furthermore, the help-seeking variables in the baseline survey provide no reasons for the  
8  
9 adolescents' encounters with the health system. Self-reports can imply an underestimation of  
10  
11 health service usage, especially use of mental health services. Other health problems than  
12  
13 those adjusted for in our analyses could have influenced help-seeking behaviour and failure to  
14  
15 complete high school. Yet disability benefits acquired at a young age were considered to have  
16  
17 been the result of the most serious health disabilities, and were therefore excluded from our  
18  
19 sample.  
20  
21

22  
23  
24 A recent validation study confirms that the HSCL-10 instrument, which we have used to  
25  
26 measure mental health problems, is a suitable diagnostic tool for adolescents in this age  
27  
28 group, and is also found to be appropriate for use in epidemiological studies. [31] Although  
29  
30 our cutoff point of 1.6 has been validated as optimal for detecting mild, moderate and severe  
31  
32 depression in 14–16-year-olds of both genders, [31] it can be argued that this cutoff may be  
33  
34 low, and could thereby define an unreasonably large proportion of adolescents as depressed.  
35  
36

37 ~~Previous studies have shown, though, that adolescents with a depressive symptom load,~~  
38  
39 ~~without meeting the diagnostic threshold for a depressive disorder, a so-called 'subsyndromal~~  
40  
41 ~~depression', can have a persistent functional impairment. [32, 33]~~ Another constraint is lack  
42  
43 of a measure of other types of mental health problems.  
44  
45

46  
47 High-school dropout has been chosen as the outcome variable because it is an early marker  
48  
49 for later work marginalisation and social exclusion. [11, 20, 21] Previous studies indicate that  
50  
51 those who drop out of high school have a higher risk of becoming dependent on welfare  
52  
53 benefits in adult life, including receipt of an early disability pension. [11, 34, 35] It can be  
54  
55 argued that the five-year limit is strict, but it is consistent with other studies on school  
56  
57  
58  
59  
60



1  
2  
3 dropout, and few of those who fail to complete high school within five years succeed in  
4  
5 finishing later. [26] ~~Approximately 15% of those who drop out of high school in Norway are~~  
6  
7 ~~unemployed or have not registered in any other activity three years later.~~ [19]  
8  
9

## 10 11 12 **Comparison with previous research**

13  
14  
15 **We do not imply that health** service use in adolescence **causes high-school dropout, rather that**  
16  
17 **it is** a proxy for problems which can be independent risk factors for dropout. Even though  
18  
19 several studies confirm an under-use of health care among adolescents who struggle with  
20  
21 somatic and mental health issues, [1, 36] both previous research [7] and the descriptive  
22  
23 material in our study, **as** shown in Table 2, confirm that **help seekers** constitute a group which  
24  
25 generally have a greater load of health problems compared to non-seekers, and should receive  
26  
27 special attention. Both structural and individual factors influence help seeking. [36, 37] From  
28  
29 previous research we know that such sociodemographic characteristics as economic status and  
30  
31 parents' educational level influence both help seeking [2, 7] and high school graduation. [8,  
32  
33 19] Health complaints which commonly lead adolescents to seek help can also influence **them**  
34  
35 **to** drop out. After correcting for such factors in our analyses, we found a negative outcome in  
36  
37 adolescents seeking help at the youth health clinic and the mental health services, indicating  
38  
39 that they have other challenges that can explain **their** higher probability **of dropping** out. On  
40  
41 the other hand, help seekers may have resources and certain personal qualities that enable  
42  
43 them to recognise and cope with their problems – a characteristic for which we cannot correct  
44  
45 in the analyses. [3]  
46  
47  
48  
49  
50

51  
52 Youth health clinics in Norway provide free advice and prescriptions for birth control and  
53  
54 treatment of sexually transmitted diseases. In addition, it is a low-threshold service **centre**  
55  
56 where adolescents can consult a nurse or a **physician** about mental health issues. Visiting the  
57  
58  
59  
60

1  
2  
3 youth health clinic multiple times at 15–16 years of age can indicate sexual debut at an early  
4 age. We know that adolescent pregnancy is a risk factor for lower educational achievement,  
5 [18] but less is known about early sexual activity in general and **failure to complete high**  
6 **school**. A previous study has shown associations between low academic achievement and  
7 high level of externalising behaviour and early sexual debut in both genders. [38] A US study  
8 on adolescents receiving mental health treatment shows associations between both  
9 externalising and internalising psychiatric disorders and sexual risk-taking behaviour. [39] To  
10 the best of our knowledge, there is limited research on boys who attend the youth health clinic  
11 or similar services, and there are few boys in our sample with multiple encounters. Those who  
12 **have multiple encounters**, however, have a dropout rate above 70%. Our results indicate that  
13 health workers in youth health clinics should be aware of and offer follow-up to adolescents  
14 with multiple visits.  
15  
16  
17  
18  
19  
20  
21  
22  
23  
24  
25  
26  
27  
28  
29

30  
31 ~~The Norwegian school health services are located at each local school and are normally run~~  
32 ~~by a school nurse. Commonly, a consultant GP is also present at a regular basis. The service~~  
33 ~~can include individual health consultations, as well as group based health and lifestyle advice.~~  
34  
35 ~~There are, however, substantial variations among schools and among regions. A recent US~~  
36 ~~study has found an association between low to moderate use of school based health centres~~  
37 ~~and reduction of dropout for high school students. [40] The American school based health~~  
38 ~~centres, however, offer a wider range of health services than do school health services in~~  
39 ~~Norway, and are therefore not directly comparable. Most of previous research on school-~~  
40 ~~based health services has been conducted outside Scandinavia and is not relevant for the~~  
41 ~~organisation of the Norwegian system. [41] Our result may indicate, however, that adolescent~~  
42 ~~frequent attenders to the school health services in Norway represent a vulnerable group, with~~  
43 ~~lower socioeconomic privilege and with more health problems than non-users, and suggests~~  
44 ~~that school nurses should be attentive to them.~~  
45  
46  
47  
48  
49  
50  
51  
52  
53  
54  
55  
56  
57  
58  
59  
60

1  
2  
3 We found that consulting the child and adolescent mental health services was associated with  
4 **lower odds for graduating from high** school. Because a referral is needed **in order** to see the  
5 mental health services, we argue that individuals who qualify for specialised therapy usually  
6 have relatively severe mental health problems. A previous study has shown that there is a  
7 dose-response association between help-seeking for mental health problems and symptom  
8 load of anxiety and depression. [42] Furthermore, early-onset mental disorders have been  
9 shown to be associated with lower educational attainment. [12, 13] It is not surprising, then,  
10 that the outcome in the group consulting mental health services at age 15–16 is less fortunate.

11  
12  
13 Boys who saw a GP regularly **were more likely to graduate from high school than their peers**,  
14 although there was no such statistically significant relationship for girls. This finding suggests  
15 that, for boys, having a stable relationship with a GP in their adolescent years can have a  
16 positive impact. Yet whereas we assume that the boys who use GP services are consulting for  
17 health problems and that they are helped in some way, they may also have individual  
18 resources which explain their better outcomes. Teenage boys have a substantially lower use of  
19 **health care** services than girls do, including seeing a GP. [43] They are also more reluctant to  
20 seek help for emotional problems [37] unless severely distressed. [44]

### 21 22 **Implications for policy and practice**

23  
24 Previous research confirms that adolescents have frequent encounters with the primary health-  
25 care services every year, [4, 45, 46] which is consistent with our findings. These contacts  
26 provide golden opportunities to uncover somatic health problems and mental distress. Health  
27 workers in the primary health-care services should **pay particular attention to adolescents** with  
28 multiple health service encounters and offer follow-up when needed. It is also important to  
29 refer to the specialist services when the severity of the condition calls for it. Our results

1  
2  
3 clearly show that **by the time** adolescents are referred to second-line mental health services,  
4  
5 **their conditions are** well entrenched and the prognosis is consequently more negative.  
6  
7

8  
9 Youth health clinics are low-threshold services which are visited by a substantial number of  
10  
11 adolescents every year – especially young girls. Considering the high probability of dropping  
12  
13 out among attenders of this service, as shown in our study, health workers should be **advised**  
14  
15 to focus particularly on these adolescents and the content of their treatment.  
16  
17

18  
19 **Whereas** girls report **more health problems and** a higher level of health service **usage than**  
20  
21 **boys do, they are more likely to graduate from high school – a dilatation that** calls for a  
22  
23 broader approach to the relationship between health and **failure to complete** high school. More  
24  
25 research is needed to **disentangle** the role of health services in dealing with adolescent health  
26  
27 and possible preventive potential for adolescents' symptom load and functional impairment in  
28  
29 the following years.  
30  
31  
32  
33  
34  
35  
36  
37  
38  
39  
40  
41  
42  
43  
44  
45  
46  
47  
48  
49  
50  
51  
52  
53  
54  
55  
56  
57  
58  
59  
60

## Acknowledgements

The data collection was carried out and funded by the Norwegian Institute of Public Health in collaboration with the University of Oslo.

We also acknowledge statistician Tore Wentzel-Larsen at the Norwegian Centre for Violence and Traumatic Stress Studies/Centre for Child and Adolescent Mental Health, Eastern and Southern Norway, Oslo, Norway for helping out with preparing the data for analyses.

**Contributors:** All three authors contributed to the study design, discussions of the results and writing of the final paper. LH prepared the data, undertook the primary analyses and the first interpretations and wrote the first draft of the paper. ORH and EOR supervised the analyses and critically reviewed the paper. ORH and EOR also took part in planning and conducting the original baseline survey. All authors approved the submitted version.

**Funding:** The study was funded by the Norwegian Research Council.

**Competing interests:** All authors have completed the Unified Competing Interest form at [www.icmje.org/coi\\_disclosure.pdf](http://www.icmje.org/coi_disclosure.pdf) (available on request from the corresponding author) and declare no competing interests.

**Ethical approval:** The study was approved by the Norwegian Institute of Public Health, Statistics Norway, the Ministry of Education and Research and the Medical Ethics Committee. These institutions gave permission for the use and linkage of the data. The adolescent participants gave written consent to link their questionnaire data to national registers at a later date.

**Data sharing:** no additional data available.

**Copyright:** The Corresponding Author has the right to grant on behalf of all authors and does grant on behalf of all authors, a worldwide licence to the Publishers and its licensees in perpetuity, in all forms, formats and media (whether known now or created in the future), to i) publish, reproduce, distribute, display and store the Contribution, ii) translate the Contribution into other languages, create adaptations, reprints, include within collections and create summaries, extracts and/or, abstracts of the Contribution, iii) create any other derivative work(s) based on the Contribution, iv) to exploit all subsidiary rights in the Contribution, v) the inclusion of electronic links from the Contribution to third party material where-ever it may be located; and, vi) licence any third party to do any or all of the above.

<http://www.bmj.com/sites/default/files/attachments/resources/2011/07/bmj-author-licence-v-19-march-2012.doc>

**WHAT IS ALREADY KNOWN ON THIS TOPIC**

High school dropouts are at risk of later marginalisation.

Poor physical and mental health **is related to dropping out from** high school.

Adolescents who use health care services constitute a vulnerable group.

**WHAT THIS STUDY ADDS**

Adolescents who see the child and adolescent mental health services at age 15, **are more likely to drop out from** high school, compared to their peers.

Adolescents who attend youth health clinics could be at risk of high school dropout.

Boys who attend a GP regularly are less likely to become highschool dropouts.

Review only

## References

1. Britto MT, Klostermann BK, Bonny AE, et al. Impact of a school-based intervention on access to healthcare for underserved youth. *The Journal of adolescent health : official publication of the Society for Adolescent Medicine* 2001;**29**(2):116-24.
2. Eisenberg D, Golberstein E, Gollust SE. Help-seeking and access to mental health care in a university student population. *Medical care* 2007;**45**(7):594-601 doi: 10.1097/MLR.0b013e31803bb4c1[published Online First: 27 Jul 2001].
3. Zwaanswijk M, Verhaak PF, Bensing JM, et al. Help seeking for emotional and behavioural problems in children and adolescents: a review of recent literature. *European child & adolescent psychiatry* 2003;**12**(4):153-61 doi: 10.1007/s00787-003-0322-6[published Online First: 16 Jun 2007].
4. Mauerhofer A, Berchtold A, Michaud PA, et al. GPs' role in the detection of psychological problems of young people: a population-based study. *The British journal of general practice : the journal of the Royal College of General Practitioners* 2009;**59**(566):e308-14 doi: 10.3399/bjgp09X454115[published Online First: 19 Sept 2009].
5. Flament MF, Cohen D, Choquet M, et al. Phenomenology, psychosocial correlates, and treatment seeking in major depression and dysthymia of adolescence. *Journal of the American Academy of Child and Adolescent Psychiatry* 2001;**40**(9):1070-8 doi: 10.1097/00004583-200109000-00016[published Online First: 15 Sept 2001].
6. Offer D, Howard KI, Schonert KA, et al. To whom do adolescents turn for help? Differences between disturbed and nondisturbed adolescents. *Journal of the American Academy of Child and Adolescent Psychiatry* 1991;**30**(4):623-30 doi: 10.1097/00004583-199107000-00015[published Online First: 1 Jul 1991].
7. Vila M, Kramer T, Obiols JE, et al. Adolescents who are frequent attenders to primary care: contribution of psychosocial factors. *Social psychiatry and psychiatric epidemiology* 2010 doi: 10.1007/s00127-010-0326-8[published Online First: 21 Dec 2010].
8. Freudenberg N, Ruglis J. Reframing school dropout as a public health issue. *Preventing chronic disease* 2007;**4**(4).
9. Suhrcke M, de Paz Nieves, C. The impact of health and health behaviours on educational outcomes in high-income countries: a review of the evidence: Copenhagen, WHO Regional Office for Europe, 2011.
10. Maslow GR, Haydon AA, Ford CA, et al. Young adult outcomes of children growing up with chronic illness: an analysis of the National Longitudinal Study of Adolescent Health. *Archives of pediatrics & adolescent medicine* 2011;**165**(3):256-61 ].
11. Gravseth HM, Bjerkedal T, Irgens LM, et al. Life course determinants for early disability pension: a follow-up of Norwegian men and women born 1967-1976. *European journal of epidemiology* 2007;**22**(8):533-43 doi: 10.1007/s10654-007-9139-9[published Online First: 29 May 2007].
12. Breslau J, Lane M, Sampson N, et al. Mental disorders and subsequent educational attainment in a US national sample. *Journal of psychiatric research* 2008;**42**(9):708-16 doi: 10.1016/j.jpsychires.2008.01.016[published Online First: 12 Mar 2008].
13. Stoep AV, Weiss NS, Kuo ES, et al. What proportion of failure to complete secondary school in the US population is attributable to adolescent psychiatric disorder? *The journal of behavioral health services & research* 2003;**30**(1):119-24.
14. Fletcher JM. Adolescent depression: diagnosis, treatment, and educational attainment. *Health economics* 2008;**17**(11):1215-35 doi: 10.1002/hec.1319[published Online First: 25 Dec 2007].

15. Needham BL. Adolescent depressive symptomatology and young adult educational attainment: an examination of gender differences. *The Journal of adolescent health : official publication of the Society for Adolescent Medicine* 2009;**45**(2):179-86 doi: 10.1016/j.jadohealth.2008.12.015[published Online First: 25 Jul 2009].
16. Markussen E, Seland I. Å redusere bortvalg - bare skolens ansvar? En undersøkelse av bortvalg ved de videregående skolene i Akershus fylkeskommune skoleåret 2010-2011. NIFU: Nordic Institute for Studies in Innovation, Research and Education, 2012.
17. Townsend L, Flisher AJ, King G. A systematic review of the relationship between high school dropout and substance use. *Clinical child and family psychology review* 2007;**10**(4):295-317.
18. Hofferth SL, Reid L, Mott FL. The effects of early childbearing on schooling over time. *Family planning perspectives* 2001;**33**(6):259-67.
19. Bratsberg B, Raaum O, Røed K, et al. Utdannings- og arbeidskarrierer hos unge voksne: Hvor havner ungdom som slutter skolen i ung alder? Frisch Report 3: Ragnar Frisch Centre for Economic Research, 2010.
20. De Ridder KA, Pape K, Johnsen R, et al. School dropout: a major public health challenge: a 10-year prospective study on medical and non-medical social insurance benefits in young adulthood, the Young-HUNT 1 Study (Norway). *Journal of epidemiology and community health* 2012 doi: 10.1136/jech-2011-200047[published Online First: 9 Febr 2012].
21. Bruusgaard D, Smeby L, Claussen B. Education and disability pension: a stronger association than previously found. *Scandinavian journal of public health* 2010;**38**(7):686-90 doi: 10.1177/1403494810378916[published Online First: 20 Aug 2010].
22. Avendano M, Jurges H, Mackenbach JP. Educational level and changes in health across Europe: longitudinal results from SHARE. *J Eur Soc Policy* 2009;**19**(4):301-16.
23. Geijerstam C. *Tidlig arbeidsledighet og marginalisering*. Contributor, Universitetet i Oslo Økonomisk institutt Ragnar Frisch Centre for Economic Research, 2001.
24. Søgaard A, Eide, T. The Oslo Health Study (HUBRO) – The Youth part (UNGHUBRO). Aims, Materials and Methods (online), 2005. Retrieved from <http://www.fhino/dav/AD07555E4Bdoc> (accessed 24 Jun 2013).
25. [http://www.fhi.no/eway/default.aspx?pid=238&trg=MainArea\\_5811&MainArea\\_5811=5895:0:15,4438:1:0:0:::0:0](http://www.fhi.no/eway/default.aspx?pid=238&trg=MainArea_5811&MainArea_5811=5895:0:15,4438:1:0:0:::0:0) (accessed 9 Apr 2013).
26. Falch T, Nyhus OH. High school dropout and labour market attachments among young adults. Centre for Economic research: NTNU, 2009.
27. Breidablik HJ, Meland E, Lydersen S. Self-rated health during adolescence: stability and predictors of change (Young-HUNT study, Norway). *European journal of public health* 2009;**19**(1):73-8.
28. Lundberg O, Manderbacka K. Assessing reliability of a measure of self-rated health. *Scandinavian journal of social medicine* 1996;**24**(3):218-24.
29. Bair MJ, Robinson RL, Katon W, et al. Depression and pain comorbidity: a literature review. *Archives of internal medicine* 2003;**163**(20):2433-45 ].
30. Strand BH, Dalgard OS, Tambs K, et al. Measuring the mental health status of the Norwegian population: a comparison of the instruments SCL-25, SCL-10, SCL-5 and MHI-5 (SF-36). *Nordic journal of psychiatry* 2003;**57**(2):113-8.
31. Haavet OR, Sirpal MK, Haugen W, et al. Diagnosis of depressed young people in primary health care--a validation of HSCL-10. *Family practice* 2011;**28**(2):233-7 doi: 10.1093/fampra/cm078[published Online First: 13 Oct 2010].



- 1
  - 2
  - 3
  - 4
  - 5
  - 6
  - 7
  - 8
  - 9
  - 10
  - 11
  - 12
  - 13
  - 14
  - 15
  - 16
  - 17
  - 18
  - 19
  - 20
  - 21
  - 22
  - 23
  - 24
  - 25
  - 26
  - 27
  - 28
  - 29
  - 30
  - 31
  - 32
  - 33
  - 34
  - 35
  - 36
  - 37
  - 38
  - 39
  - 40
  - 41
  - 42
  - 43
  - 44
  - 45
  - 46
  - 47
  - 48
  - 49
  - 50
  - 51
  - 52
  - 53
  - 54
  - 55
  - 56
  - 57
  - 58
  - 59
  - 60
- ~~32. Angold A, Costello EJ, Farmer EM, et al. Impaired but undiagnosed. *Journal of the American Academy of Child and Adolescent Psychiatry* 1999;**38**(2):129-37 doi: 10.1097/00004583-199902000-00011[published Online First: 10 Febr 1999].~~
- ~~33. Fergusson DM, Horwood LJ, Ridder EM, et al. Subthreshold depression in adolescence and mental health outcomes in adulthood. *Archives of general psychiatry* 2005;**62**(1):66-72 doi: 10.1001/archpsyc.62.1.66[published Online First: 5 Jan 2005].~~
34. Gjesdal S, Ringdal PR, Haug K, et al. Long-term sickness absence and disability pension with psychiatric diagnoses: a population-based cohort study. *Nordic journal of psychiatry* 2008;**62**(4):294-301 doi: 10.1080/08039480801984024[published Online First: 16 Jul 2008].
35. Wilford J, McMahon AD, Peters J, et al. Predicting job loss in those off sick. *Occupational medicine* 2008;**58**(2):99-106 doi: 10.1093/occmed/kqm141[published Online First: 25 Jan 2008].
36. Zwaanswijk M, Van der Ende J, Verhaak PF, et al. Factors associated with adolescent mental health service need and utilization. *Journal of the American Academy of Child and Adolescent Psychiatry* 2003;**42**(6):692-700 doi: 10.1097/01.CHI.0000046862.56865.B7[published Online First: 19 Aug 2003].
37. Barker G, Olukoya A, Aggleton P. Young people, social support and help-seeking. *International journal of adolescent medicine and health* 2005;**17**(4):315-35.
38. Price MN, Hyde JS. When two isn't better than one: predictors of early sexual activity in adolescence using a cumulative risk model. *Journal of youth and adolescence* 2009;**38**(8):1059-71 .
39. Brown LK, Hadley W, Stewart A, et al. Psychiatric disorders and sexual risk among adolescents in mental health treatment. *Journal of consulting and clinical psychology* 2010;**78**(4):590-7 doi: 10.1037/a0019632[published Online First: 28 Jul 2010].
- ~~40. Kerns SE, Pullmann MD, Walker SC, et al. Adolescent use of school-based health centers and high school dropout. *Archives of pediatrics & adolescent medicine* 2011;**165**(7):617-23.~~
- ~~41. Dahm KT, Landmark B, Reinar LM. The effects of school health services for children and young people's health and growing up conditions. *Norwegian Knowledge centre for the Health Services: NOKC, 2010.*~~
42. Zachrisson HD, Rodje K, Mykletun A. Utilization of health services in relation to mental health problems in adolescents: a population based survey. *BMC public health* 2006;**6**:34 doi: 10.1186/1471-2458-6-34[published Online First: 17 Febr 2006].
43. Marcell AV, Klein JD, Fischer I, et al. Male adolescent use of health care services: where are the boys? *The Journal of adolescent health : official publication of the Society for Adolescent Medicine* 2002;**30**(1):35-43.
44. Biddle L, Gunnell D, Sharp D, et al. Factors influencing help seeking in mentally distressed young adults: a cross-sectional survey. *The British journal of general practice : the journal of the Royal College of General Practitioners* 2004;**54**(501):248-53.
45. Haavet OR, Straand J, Hjortdahl P, et al. Do negative life experiences predict the health-care-seeking of adolescents? A study of 10th-year students in Oslo, Norway. *The Journal of adolescent health : official publication of the Society for Adolescent Medicine* 2005;**37**(2):128-34 doi: 10.1016/j.jadohealth.2004.08.031[published Online First: 20 Jul 2005].
46. Santelli J, Klein J, Graff C, et al. Reliability in adolescent reporting of clinician counseling, health care use, and health behaviors. *Medical care* 2002;**40**(1):26-37.

1  
2  
3  
4  
5  
6  
7  
8  
9  
10  
11  
12  
13  
14  
15  
16  
17  
18  
19  
20  
21  
22  
23  
24  
25  
26  
27  
28  
29  
30  
31  
32  
33  
34  
35  
36  
37  
38  
39  
40  
41  
42  
43  
44  
45  
46  
47  
48  
49  
50  
51  
52  
53  
54  
55  
56  
57  
58  
59  
60

For peer review only

Table 1 Descriptive characteristics of the study population (N=13964) at baseline, 2000–2004, and at follow-up, 2010.

| <b>At baseline:</b>                     |                                       |          |          |
|-----------------------------------------|---------------------------------------|----------|----------|
|                                         |                                       | <b>N</b> | <b>%</b> |
| <b>Gender</b>                           |                                       |          |          |
|                                         | Girls                                 | 7019     | 50.3     |
|                                         | Boys                                  | 6945     | 49.7     |
| <b>Sociodemographic characteristics</b> |                                       |          |          |
| <b>Ethnicity</b>                        |                                       |          |          |
|                                         | Ethnic Norwegian                      | 12155    | 87.0     |
|                                         | 1 <sup>st</sup> generation immigrant  | 1126     | 8.1      |
|                                         | 2 <sup>nd</sup> generation immigrant  | 683      | 4.9      |
| <b>Parents' educational level</b>       |                                       |          |          |
|                                         | College or university degree >4 years | 1937     | 13.9     |
|                                         | College or university degree ≤4 years | 4277     | 30.6     |
|                                         | High school                           | 5681     | 40.7     |
|                                         | Primary school                        | 1864     | 13.3     |
|                                         | Missing                               | 205      | 1.5      |
| <b>Parents' marital status</b>          |                                       |          |          |
|                                         | Married or living together            | 9255     | 66.3     |
|                                         | Other                                 | 4600     | 32.9     |
|                                         | Missing                               | 109      | 0.8      |
| <b>Household income</b>                 |                                       |          |          |
|                                         | Very good or good                     | 8732     | 62.5     |
|                                         | Mediocre                              | 4546     | 32.6     |
|                                         | Poor                                  | 457      | 3.3      |
|                                         | Missing                               | 229      | 1.6      |
| <b>Status at follow-up:</b>             |                                       |          |          |
| <b>High school drop-out</b>             |                                       |          |          |
|                                         | Total                                 | 4040     | 28.9     |
|                                         | Girls                                 | 1668     | 23.8     |
|                                         | Boys                                  | 2372     | 34.2     |

Table 2: Percentage of 15–16-year-olds reporting different health problems within type and level of reported health care use, all numbers stratified by gender (N=13964)

|                                                      | Asthma         |               | Allergy        |               | Poor self-perceived health |               | Experienced serious illness/injury past 12 months |               | Pain sites $\geq 3$ past 12 months |               | HSCL10 $\geq 1.6$ |               |
|------------------------------------------------------|----------------|---------------|----------------|---------------|----------------------------|---------------|---------------------------------------------------|---------------|------------------------------------|---------------|-------------------|---------------|
|                                                      | Girls<br>N (%) | Boys<br>N (%) | Girls<br>N (%) | Boys<br>N (%) | Girls<br>N (%)             | Boys<br>N (%) | Girls<br>N (%)                                    | Boys<br>N (%) | Girls<br>N (%)                     | Boys<br>N (%) | Girls<br>N (%)    | Boys<br>N (%) |
| <b>Total numbers reporting health problems</b>       | 910 (13.7)     | 897 (13.5)    | 2756 (41.0)    | 2448 (36.5)   | 960 (13.9)                 | 645 (9.4)     | 606 (9.2)                                         | 651 (9.9)     | 2683 (40.4)                        | 1473 (22.3)   | 2390 (35.2)       | 906 (13.4)    |
| <b>Within self-reported level of health care use</b> |                |               |                |               |                            |               |                                                   |               |                                    |               |                   |               |
| <i>School health services</i>                        |                |               |                |               |                            |               |                                                   |               |                                    |               |                   |               |
| None                                                 | 565 (12.7)     | 726 (13.2)    | 1758 (39.1)    | 2008 (36.1)   | 556 (12.1)                 | 492 (8.7)     | 351 (8.0)                                         | 498 (9.1)     | 1555 (35.0)                        | 1135 (20.7)   | 1415 (31.1)       | 688 (12.2)    |
| 1-3                                                  | 270 (15.0)     | 150 (14.8)    | 821 (44.8)     | 398 (38.8)    | 296 (15.7)                 | 132 (12.5)    | 189 (10.6)                                        | 133 (13.3)    | 894 (48.8)                         | 298 (29.7)    | 750 (40.3)        | 194 (18.9)    |
| $\geq 4$                                             | 63 (20.7)      | 8 (13.3)      | 150 (48.1)     | 20 (35.1)     | 86 (26.8)                  | 10 (16.7)     | 54 (17.9)                                         | 11 (19.3)     | 201 (65.3)                         | 24 (41.4)     | 200 (63.3)        | 22 (36.7)     |
| <i>Youth health clinic</i>                           |                |               |                |               |                            |               |                                                   |               |                                    |               |                   |               |
| None                                                 | 671 (12.8)     | 796 (13.1)    | 2093 (39.6)    | 2214 (36.2)   | 679 (12.6)                 | 553 (8.8)     | 433 (8.3)                                         | 567 (9.4)     | 1922 (36.8)                        | 1289 (21.3)   | 1709 (32.1)       | 786 (12.7)    |
| 1-3                                                  | 183 (16.3)     | 79 (16.9)     | 533 (46.5)     | 191 (40.6)    | 201 (16.9)                 | 70 (14.4)     | 138 (12.5)                                        | 68 (14.8)     | 591 (51.8)                         | 150 (32.3)    | 524 (44.7)        | 103 (21.5)    |
| $\geq 4$                                             | 49 (20.3)      | 5 (13.5)      | 114 (46.5)     | 11 (30.6)     | 67 (26.4)                  | 7 (18.4)      | 34 (14.3)                                         | 7 (19.4)      | 150 (61.7)                         | 13 (36.1)     | 146 (57.9)        | 12 (33.3)     |
| <i>General practitioner</i>                          |                |               |                |               |                            |               |                                                   |               |                                    |               |                   |               |
| None                                                 | 237 (8.8)      | 365 (10.4)    | 870 (32.2)     | 1128 (31.9)   | 258 (9.3)                  | 301 (8.3)     | 108 (4.1)                                         | 192 (5.5)     | 805 (30.2)                         | 605 (17.3)    | 796 (29.2)        | 437 (12.2)    |
| 1-3                                                  | 485 (15.6)     | 410 (15.6)    | 1413 (44.8)    | 1074 (40.7)   | 466 (14.4)                 | 255 (9.4)     | 284 (9.2)                                         | 314 (12.0)    | 1377 (44.0)                        | 680 (26.1)    | 1155 (36.3)       | 373 (13.9)    |
| $\geq 4$                                             | 178 (22.8)     | 105 (24.4)    | 450 (56.2)     | 208 (47.5)    | 223 (27.1)                 | 73 (16.2)     | 211 (27.4)                                        | 137 (32.2)    | 480 (60.2)                         | 163 (38.6)    | 422 (51.7)        | 90 (20.4)     |
| <i>Child and adolescent mental health services</i>   |                |               |                |               |                            |               |                                                   |               |                                    |               |                   |               |
| None                                                 | 810 (13.2)     | 834 (13.2)    | 2499 (40.3)    | 2323 (36.3)   | 793 (12.5)                 | 584 (8.9)     | 525 (8.6)                                         | 601 (9.6)     | 2383 (38.8)                        | 1361 (21.6)   | 2046 (32.6)       | 803 (12.4)    |
| $\geq 1$                                             | 87 (19.5)      | 47 (19.5)     | 238 (51.7)     | 96 (39.8)     | 147 (31.5)                 | 46 (18.5)     | 76 (17.7)                                         | 43 (18.5)     | 272 (60.0)                         | 90 (37.5)     | 323 (69.5)        | 96 (40.5)     |

Table 3: Health care seeking behaviour and health indicators in 15–16-year-olds and percentage of high school dropout 5 years later (N=13 964)

| Self-reported level of health care use             | Girls       |           | Boys        |           |
|----------------------------------------------------|-------------|-----------|-------------|-----------|
|                                                    | N(%)        | Dropout % | N(%)        | Dropout % |
| <b>School health services</b>                      |             |           |             |           |
| None                                               | 4690 (67.7) | 22.2      | 5728 (83.6) | 32.7      |
| 1-3                                                | 1917 (27.7) | 24.6      | 1064 (15.5) | 39.8      |
| ≥4                                                 | 323 (4.7)   | 36.5      | 60 (0.9)    | 48.3      |
| <b>Youth health clinic</b>                         |             |           |             |           |
| None                                               | 5496 (79.0) | 20.8      | 6314 (92.3) | 32.8      |
| 1-3                                                | 1209 (17.4) | 32.4      | 490 (7.2)   | 44.5      |
| ≥4                                                 | 256 (3.7)   | 44.5      | 38 (0.6)    | 71.1      |
| <b>General practitioner</b>                        |             |           |             |           |
| None                                               | 2808 (40.5) | 23.4      | 3653 (53.4) | 36.8      |
| 1-3                                                | 3289 (47.4) | 22.5      | 2729 (39.9) | 29.8      |
| ≥4                                                 | 841 (12.1)  | 27.8      | 453 (6.6)   | 36.0      |
| <b>Child and adolescent mental health services</b> |             |           |             |           |
| None                                               | 6463 (93.1) | 21.8      | 6590 (96.3) | 32.8      |
| ≥1                                                 | 477 (6.9)   | 47.0      | 251 (3.7)   | 62.2      |
| <b>Health indicators</b>                           |             |           |             |           |
| <b>Asthma</b>                                      |             |           |             |           |
| None                                               | 5730 (86.3) | 23.1      | 5753 (86.5) | 33.3      |
| Yes                                                | 910 (13.7)  | 27.1      | 897 (13.5)  | 37.9      |
| <b>Allergy</b>                                     |             |           |             |           |
| None                                               | 3958 (59.0) | 21.9      | 4261 (63.5) | 33.5      |
| Yes                                                | 2756 (41.0) | 25.9      | 2448 (36.5) | 34.4      |
| <b>Self-perceived health</b>                       |             |           |             |           |
| Very good/good                                     | 5932 (86.1) | 21.8      | 6227 (90.6) | 32.8      |
| Not good/poor                                      | 960 (13.9)  | 36.8      | 645 (9.4)   | 46.8      |
| <b>Serious illness/injury past 12 months</b>       |             |           |             |           |
| None                                               | 5956 (90.8) | 23.1      | 5929 (90.1) | 33.4      |
| Yes                                                | 606 (9.2)   | 24.1      | 651 (9.9)   | 37.2      |
| <b>Pain sites reported past 12 months</b>          |             |           |             |           |
| <3                                                 | 3917 (59.6) | 19.6      | 5107 (77.7) | 31.6      |
| ≥3                                                 | 2463 (40.4) | 29.3      | 1385 (22.3) | 42.2      |
| <b>HSCL10</b>                                      |             |           |             |           |
| <1.6                                               | 4391 (64.8) | 19.3      | 5848 (86.6) | 31.8      |
| ≥1.6                                               | 2390 (35.2) | 30.5      | 906 (13.4)  | 45.7      |
| <b>Sociodemographic variables</b>                  |             |           |             |           |
| <b>Ethnicity</b>                                   |             |           |             |           |
| Ethnic Norwegian                                   | 6115 (87.1) | 22.5      | 6040 (87.0) | 31.8      |
| 1 <sup>st</sup> generation immigrant               | 580 (8.3)   | 36.7      | 546 (7.9)   | 53.7      |
| 2 <sup>nd</sup> generation immigrant               | 324 (4.6)   | 25.0      | 359 (5.2)   | 43.7      |
| <b>Parents' marital status</b>                     |             |           |             |           |
| Married/living together                            | 4655 (66.6) | 18.4      | 4600 (67.0) | 28.8      |
| Other                                              | 2335 (33.4) | 34.2      | 2265(33.0)  | 44.1      |
| <b>Household income</b>                            |             |           |             |           |
| Very good or good                                  | 4212 (60.9) | 20.2      | 4520 (66.2) | 31.9      |
| Mediocre                                           | 2450 (35.4) | 27.3      | 2096 (30.7) | 36.2      |
| Poor                                               | 250 (3.6)   | 45.6      | 207 (3.0)   | 48.3      |
| <b>Parents' educational level</b>                  |             |           |             |           |
| College/university degree >4 years                 | 1001 (14.5) | 7.6       | 936 (13.7)  | 12.8      |
| College/university degree ≤4 years                 | 2135 (30.9) | 14.3      | 2142 (31.3) | 24.2      |

Table 3: Health care seeking behaviour and health indicators in 15–16-year-olds and percentage of high school dropout 5 years later (N=13 964)

|                |             |      |             |      |
|----------------|-------------|------|-------------|------|
| High school    | 2867 (41.4) | 29.1 | 2814 (41.1) | 39.5 |
| Primary school | 915 (13.2)  | 44.3 | 949 (13.9)  | 59.1 |

For peer review only

Table 3: Health care seeking behaviour and health indicators in 15–16-year-olds and percentage of high school dropout 5 years later (N=13 964)

1  
2  
3  
4  
5  
6  
7  
8  
9  
10  
11  
12  
13  
14  
15  
16  
17  
18  
19  
20  
21  
22  
23  
24  
25  
26  
27  
28  
29  
30  
31  
32  
33  
34  
35  
36  
37  
38  
39  
40  
41  
42  
43  
44  
45  
46  
47  
48  
49  
50  
51  
52  
53  
54  
55  
56  
57  
58  
59  
60

For peer review only

Table 4: Associations between health care seeking behaviour evaluated in 10<sup>th</sup> grade adolescents and high school drop-out five years later. Investigated using multiple logistic regression analysis.

|                                                    |            | Crude                         |                                | Adjusted†                     |                               |
|----------------------------------------------------|------------|-------------------------------|--------------------------------|-------------------------------|-------------------------------|
|                                                    |            | Girls                         | Boys                           | Girls                         | Boys                          |
| Self-reported level of health care use             |            | OR (95% CI) ††                | OR (95% CI)                    | OR (95% CI)                   | OR (95% CI)                   |
| <b>School health services</b>                      | None (ref) |                               |                                |                               |                               |
|                                                    | 1-3        | <b>1.15 (1.01 to 1.30)*</b>   | <b>1.36 (1.19 to 1.56)***</b>  | <b>0.82 (0.70 to 0.96)*</b>   | 1.15 (0.97 to 1.36)           |
|                                                    | ≥4         | <b>2.02 (1.59 to 2.56)***</b> | <b>1.93 (1.16 to 3.21)*</b>    | 0.86 (0.63 to 1.17)           | 0.71 (0.37 to 1.36)           |
| <b>Youth health clinic</b>                         | None (ref) |                               |                                |                               |                               |
|                                                    | 1-3        | <b>1.83 (1.60 to 2.10)***</b> | <b>1.64 (1.36 to 1.97)***</b>  | <b>1.72 (1.45 to 2.04)***</b> | 1.16 (0.92 to 1.45)           |
|                                                    | ≥4         | <b>3.06 (2.37 to 3.95)***</b> | <b>5.02 (2.48 to 10.14)***</b> | <b>1.99 (1.45 to 2.73)***</b> | <b>2.76 (1.24 to 6.13)*</b>   |
| <b>General practitioner</b>                        | None (ref) |                               |                                |                               |                               |
|                                                    | 1-3        | 0.95 (0.84 to 1.07)           | <b>0.73 (0.65 to 0.81)***</b>  | 0.89 (0.77 to 1.03)           | <b>0.69 (0.61 to 0.79)***</b> |
|                                                    | ≥4         | <b>1.26 (1.06 to 1.50)**</b>  | 0.96 (0.79 to 1.18)            | 0.87 (0.69 to 1.10)           | 0.85 (0.66 to 1.09)           |
| <b>Child and adolescent mental health services</b> | None (ref) |                               |                                |                               |                               |
|                                                    | ≥1         | <b>3.18 (2.63 to 3.84)***</b> | <b>3.37 (2.60 to 4.37)***</b>  | <b>2.04 (1.60 to 2.60)***</b> | <b>2.85 (2.07 to 3.93)**</b>  |

† In the adjusted model use of each health service is adjusted for use of the other health care services, health indicators and sociodemographic variables

†† All associations expressed in odds ratios (OR) with 95% confidence intervals (CI).

\*\*\* significant relationship,  $p \leq 0.001$

\*\* significant relationship,  $p \leq 0.01$

\* significant relationship,  $p \leq 0.05$



1  
2  
3  
4  
5  
6  
7  
8  
9  
10  
11  
12  
13  
14  
15  
16  
17  
18  
19  
20  
21  
22  
23  
24  
25  
26  
27  
28  
29  
30  
31  
32  
33  
34  
35  
36  
37  
38  
39  
40  
41  
42  
43  
44  
45  
46  
47  
48  
49  
50  
51  
52  
53  
54  
55  
56  
57  
58  
59  
60

For peer review only

STROBE Statement—Checklist of items that should be included in reports of *cohort studies*

|                              | Item No | Recommendation                                                                                                                                                                                                                                                                                                                                                                                                |
|------------------------------|---------|---------------------------------------------------------------------------------------------------------------------------------------------------------------------------------------------------------------------------------------------------------------------------------------------------------------------------------------------------------------------------------------------------------------|
| <b>Title and abstract</b>    | 1       | (a) Indicate the study's design with a commonly used term in the title or the abstract<br>(b) Provide in the abstract an informative and balanced summary of what was done and what was found                                                                                                                                                                                                                 |
| <b>Introduction</b>          |         |                                                                                                                                                                                                                                                                                                                                                                                                               |
| Background/rationale         | 2       | Explain the scientific background and rationale for the investigation being reported                                                                                                                                                                                                                                                                                                                          |
| Objectives                   | 3       | State specific objectives, including any prespecified hypotheses                                                                                                                                                                                                                                                                                                                                              |
| <b>Methods</b>               |         |                                                                                                                                                                                                                                                                                                                                                                                                               |
| Study design                 | 4       | Present key elements of study design early in the paper                                                                                                                                                                                                                                                                                                                                                       |
| Setting                      | 5       | Describe the setting, locations, and relevant dates, including periods of recruitment, exposure, follow-up, and data collection                                                                                                                                                                                                                                                                               |
| Participants                 | 6       | (a) Give the eligibility criteria, and the sources and methods of selection of participants. Describe methods of follow-up<br>(b) For matched studies, give matching criteria and number of exposed and unexposed                                                                                                                                                                                             |
| Variables                    | 7       | Clearly define all outcomes, exposures, predictors, potential confounders, and effect modifiers. Give diagnostic criteria, if applicable                                                                                                                                                                                                                                                                      |
| Data sources/<br>measurement | 8*      | For each variable of interest, give sources of data and details of methods of assessment (measurement). Describe comparability of assessment methods if there is more than one group                                                                                                                                                                                                                          |
| Bias                         | 9       | Describe any efforts to address potential sources of bias                                                                                                                                                                                                                                                                                                                                                     |
| Study size                   | 10      | Explain how the study size was arrived at                                                                                                                                                                                                                                                                                                                                                                     |
| Quantitative variables       | 11      | Explain how quantitative variables were handled in the analyses. If applicable, describe which groupings were chosen and why                                                                                                                                                                                                                                                                                  |
| Statistical methods          | 12      | (a) Describe all statistical methods, including those used to control for confounding<br>(b) Describe any methods used to examine subgroups and interactions<br>(c) Explain how missing data were addressed<br>(d) If applicable, explain how loss to follow-up was addressed<br>(e) Describe any sensitivity analyses                                                                                        |
| <b>Results</b>               |         |                                                                                                                                                                                                                                                                                                                                                                                                               |
| Participants                 | 13*     | (a) Report numbers of individuals at each stage of study—eg numbers potentially eligible, examined for eligibility, confirmed eligible, included in the study, completing follow-up, and analysed<br>(b) Give reasons for non-participation at each stage<br>(c) Consider use of a flow diagram                                                                                                               |
| Descriptive data             | 14*     | (a) Give characteristics of study participants (eg demographic, clinical, social) and information on exposures and potential confounders<br>(b) Indicate number of participants with missing data for each variable of interest<br>(c) Summarise follow-up time (eg, average and total amount)                                                                                                                |
| Outcome data                 | 15*     | Report numbers of outcome events or summary measures over time                                                                                                                                                                                                                                                                                                                                                |
| Main results                 | 16      | (a) Give unadjusted estimates and, if applicable, confounder-adjusted estimates and their precision (eg, 95% confidence interval). Make clear which confounders were adjusted for and why they were included<br>(b) Report category boundaries when continuous variables were categorized<br>(c) If relevant, consider translating estimates of relative risk into absolute risk for a meaningful time period |

|    |                          |    |                                                                                                                                                                            |
|----|--------------------------|----|----------------------------------------------------------------------------------------------------------------------------------------------------------------------------|
| 1  | Other analyses           | 17 | Report other analyses done—eg analyses of subgroups and interactions, and sensitivity analyses                                                                             |
| 2  |                          |    |                                                                                                                                                                            |
| 3  |                          |    |                                                                                                                                                                            |
| 4  | <b>Discussion</b>        |    |                                                                                                                                                                            |
| 5  | Key results              | 18 | Summarise key results with reference to study objectives                                                                                                                   |
| 6  | Limitations              | 19 | Discuss limitations of the study, taking into account sources of potential bias or imprecision. Discuss both direction and magnitude of any potential bias                 |
| 7  |                          |    |                                                                                                                                                                            |
| 8  | Interpretation           | 20 | Give a cautious overall interpretation of results considering objectives, limitations, multiplicity of analyses, results from similar studies, and other relevant evidence |
| 9  |                          |    |                                                                                                                                                                            |
| 10 | Generalisability         | 21 | Discuss the generalisability (external validity) of the study results                                                                                                      |
| 11 |                          |    |                                                                                                                                                                            |
| 12 | <b>Other information</b> |    |                                                                                                                                                                            |
| 13 |                          |    |                                                                                                                                                                            |
| 14 | Funding                  | 22 | Give the source of funding and the role of the funders for the present study and, if applicable, for the original study on which the present article is based              |
| 15 |                          |    |                                                                                                                                                                            |
| 16 |                          |    |                                                                                                                                                                            |

\*Give information separately for exposed and unexposed groups.

**Note:** An Explanation and Elaboration article discusses each checklist item and gives methodological background and published examples of transparent reporting. The STROBE checklist is best used in conjunction with this article (freely available on the Web sites of PLoS Medicine at <http://www.plosmedicine.org/>, Annals of Internal Medicine at <http://www.annals.org/>, and Epidemiology at <http://www.epidem.com/>). Information on the STROBE Initiative is available at <http://www.strobe-statement.org>.

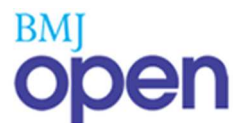

**Can use of health care services in 15–16-year-olds predict an increased level of high school dropout? A longitudinal community study.**

|                                 |                                                                                                                                                                                                                                                                                         |
|---------------------------------|-----------------------------------------------------------------------------------------------------------------------------------------------------------------------------------------------------------------------------------------------------------------------------------------|
| Journal:                        | <i>BMJ Open</i>                                                                                                                                                                                                                                                                         |
| Manuscript ID:                  | bmjopen-2013-003125.R2                                                                                                                                                                                                                                                                  |
| Article Type:                   | Research                                                                                                                                                                                                                                                                                |
| Date Submitted by the Author:   | 13-Aug-2013                                                                                                                                                                                                                                                                             |
| Complete List of Authors:       | Homlong, Lisbeth; Institute of Health and society, University of Oslo, Department of General Practice/Family Medicine<br>Haavet, Ole; Institute of Health and Society, Department of General Practice<br>Rosvold, Elin; Institute of Health and Society, Department of General Practice |
| <b>Primary Subject Heading</b>: | Health services research                                                                                                                                                                                                                                                                |
| Secondary Subject Heading:      | General practice / Family practice, Epidemiology, Public health                                                                                                                                                                                                                         |
| Keywords:                       | EPIDEMIOLOGY, PRIMARY CARE, PUBLIC HEALTH                                                                                                                                                                                                                                               |
|                                 |                                                                                                                                                                                                                                                                                         |

SCHOLARONE™  
Manuscripts

1  
2  
3 **Can use of health care services among 15–16-year-olds predict an increased level of**  
4 **high school dropout? A longitudinal community study.**  
5  
6

7  
8 Lisbeth Homlong, Elin O. Rosvold, Ole R. Haavet  
9

10  
11  
12 Department of General Practice, Institute of Health and Society, P.O. Box 1130, Blindern,  
13

14  
15  
16 N-0318 Oslo, University of Oslo, Norway,  
17

18  
19 Lisbeth Homlong, PhD candidate;  
20

21  
22 Elin O. Rosvold, professor;  
23

24  
25 Ole R. Haavet, associate professor.  
26  
27  
28  
29  
30  
31  
32  
33

34 Corresponding author:  
35

36  
37 Lisbeth Homlong  
38

39  
40 Mail: [lisbeth.homlong@medisin.uio.no](mailto:lisbeth.homlong@medisin.uio.no)  
41  
42  
43  
44  
45

46 **Word count:** 3872  
47  
48  
49  
50  
51

52 **Key words:** Health care seeking behavior; adolescent; student dropouts; primary health care;  
53  
54 general practitioner.  
55  
56  
57  
58  
59  
60

## Article summary

**Can use of health care services among 15–16-year-olds predict an increased level of high school dropout? A longitudinal community study.**

### Article focus

\* To determine if health care seeking among 15–16-year-olds is associated with high school dropout five years later.

\* To investigate the relationship between health care seeking behaviour and health among 15–16-year-olds and level of high school dropout five years later.

### Key messages

\* Adolescents who make contacts with the child and adolescent mental health services at age 15–16, are more likely than their peers to drop out of high school.

\* Adolescents who attend youth health clinics have higher odds of becoming high school dropouts.

\* Boys who visit a GP and girls who attend the school health services regularly are less likely to become high school dropouts.

### Strengths and limitations

The results of this study are based on a large community study with a substantial number of participants, yielding a high response rate and few missing data. The prospective–longitudinal design provides a higher power than does a cross-sectional design, because we were able to observe a temporal order of events on an individual level. The baseline survey was conducted in six Norwegian counties in both urban and rural areas and encompasses the entire youth population in these regions. Thus, the adolescent study sample should be representative for a general youth population. Furthermore, the compulsory Norwegian registries linked to the baseline data provided us with complete, reliable follow-up material. The items addressed in the baseline questionnaire have some limitations, however. The help-seeking variables did not provide us with reasons for the adolescents' encounters with the health system. The questions concerning health lack information on the severity or chronicity of conditions. Self-reports can also engender an understimation of health service use and incomplete information on health – especially mental health problems and the use of mental health services.

**ABSTRACT**

**Objectives:** To study associations between health care seeking in 15–16-year-olds and high school dropout five years later.

**Design:** Longitudinal community study.

**Setting:** Data from a comprehensive youth health survey conducted in 2000–2004, linked to data from national registries up to 2010.

**Participants:** 13 964 10th grade secondary school students in six Norwegian counties.

**Main outcome measure:** Logistic regression was used to compute odds ratios for high school dropout.

**Results:** The total proportion of students not completing high school five years after registering was 29% (girls 24%, boys 34%). Frequent attenders to school health services and youth health clinics at age 15–16 had a higher dropout rate (37/48% and 45/71%), compared with those with no (22/33% and 21/33%) or moderate use (25/40% and 32/45%). Adolescents referred to child and adolescent mental health services were also more likely to drop out (47/62%). Boys with moderate use of a general practitioner (GP) had a lower dropout rate (30%).

A multiple logistic regression analysis, in which we adjusted for selected health indicators and sociodemographic background variables, revealed that seeking help from the youth health clinic and consulting child and adolescent mental health services, were associated with increased level of high school dropout five years later. Frequent attenders ( $\geq 4$  contacts) had the highest odds of dropping out. Yet boys who saw a GP and girls attending the school health

1  
2  
3 services 1–3 times over the previous year were less likely than their peers to drop out from  
4  
5 high school.  
6  
7

8 **Conclusions:** Adolescents who seek help at certain health care services can be at risk of  
9  
10 dropping out of high school later. Health workers should pay particular attention to frequent  
11  
12 attenders and offer follow-up when needed. On the other hand, boys who attended a GP  
13  
14 regularly were more likely to continue to high school graduation, which may indicate a  
15  
16 protective effect of having a regular and stable relationship with a GP.  
17  
18  
19  
20  
21  
22  
23  
24  
25  
26  
27  
28  
29  
30  
31  
32  
33  
34  
35  
36  
37  
38  
39  
40  
41  
42  
43  
44  
45  
46  
47  
48  
49  
50  
51  
52  
53  
54  
55  
56  
57  
58  
59  
60



## INTRODUCTION

Adolescents reporting poor health tend to have an underconsumption of health care facilities according to their expected need, hence a considerable proportion of them seem to have health problems not met by health care professionals. [1-3] Other studies have suggested that only a minority of adolescents with mental health problems seek health care for these reasons. [4, 5] Nevertheless, help seekers should be considered a vulnerable group. A US study has shown that disturbed adolescents more frequently seek help from professional health care services than do their non-disturbed peers. [6] Furthermore, adolescent frequent attenders to primary health care report more physical health complaints, more emotional problems and more days off school than do regular primary health care attenders. [7]

Poor mental and physical health are among several factors which can have an influence on help seeking behaviour and at adolescents' ability to graduate from high school. [8, 9]

Although chronic disease in childhood has an impact on educational level and work participation in adult life, [10, 11] less is known about the effects of ill health during adolescent years. [9] An increasing load of mental health problems in young people, including depressive symptomatology, can play a role [12, 13] and several studies have shown associations with failure to complete high school. [14, 15] In a recent Norwegian study, one out of five high school dropouts reported that they quit because of mental health problems. [16] Previous research indicates that teenage pregnancy and substance abuse are also associated with dropping out. [17, 18]

A substantial number of adolescents drop out of high school, placing themselves at higher risk of marginalisation later in life [8, 19] and generating considerable public attention in recent years. Norway and several other western countries experience the same challenges. In Norway, adolescents normally enrol in high school at age 15–16, immediately after finishing

1  
2  
3 10th grade, which is the last year of compulsory school. Students are supposed to complete  
4  
5 high school within three years. Those who fail to graduate within five years after registering  
6  
7 as students are defined as high school dropouts. A recent Norwegian study has shown that  
8  
9 high school dropouts are at higher risk than their peers of receiving social security benefits  
10  
11 five years later. [20] Previous studies have found a strong association between low  
12  
13 educational level and early receipt of a disability pension. [11, 21] Education is a key to  
14  
15 participation in adult work life, and high school graduation has a strong influence on future  
16  
17 health and well-being. [8, 22]  
18  
19

20  
21 The concept of marginalisation is often used to describe a process that in a worst case  
22  
23 scenario can end up in permanent exclusion.[23] Dropping out of high school can be a first  
24  
25 step in the process of marginalisation. High school dropout and marginalisation among young  
26  
27 adults are fields that must be approached from different angles. Both individual characteristics  
28  
29 and contextual factors related to family, friends, the community, the schools and the school  
30  
31 system have an influence on dropout.  
32  
33  
34  
35

36 In our study we addressed the problem from a health-related perspective, by exploring if  
37  
38 adolescents at risk had made contacts with the health services already at age 15–16. Help  
39  
40 seeking behaviour cannot be explored without including health and sociodemographic  
41  
42 background factors. As we consider help seekers a vulnerable group, the aim of our study was  
43  
44 to determine if adolescent help seekers also have increased odds of high school dropout in a  
45  
46 longitudinal perspective.  
47  
48  
49  
50  
51  
52  
53  
54  
55  
56  
57  
58  
59  
60

## METHODS

### Population

A large comprehensive health survey of all 10th grade secondary school students (aged 15–16) in six Norwegian counties, was conducted between 2000 and 2004. The youth survey was initiated in Oslo in 2000 and was extended to include five more counties in the following years 2001–2004. Originally 18 425 10th graders were invited to the baseline studies, while the overall response rate was 87% (n=15 966). The study was organised as a classroom survey, where the pupils filled out a written questionnaire during 2 school hours. An assistant was present to provide information to the participants and administer the questionnaires. Pupils not present at school at the day of the survey were left questionnaires at the schools to be filled out later. Those not responding, received a copy by mail to their home address along with a stamped return envelope.

Participation in the survey was voluntary and the pupils signed an informed consent in advance. The survey comprised questions about relationships with family, friends and school; physical and mental health; health behaviour; and life events. [24] More detailed information about the health survey is available on the website of the Norwegian Institute of Public Health. [25]

Questionnaire data from the study were linked to data from the National Education Registry and the National Insurance Services (NIS/FD-trygd), compulsory national databases which supply detailed information on the entire cohort up to the year 2010. A precise linkage of records was possible because of the national identification number given to every resident of Norway. After linkage by Statistics Norway, the national identification numbers were removed from the data sets and kept within a safe computer system to secure anonymity for each individual. At baseline, the adolescent contributors to the questionnaires were asked for

1  
2  
3 their consent to link the data from the questionnaires to national registers at a later date; 90%  
4  
5 of the 15 966 in our baseline population agreed (n=14 062).  
6  
7

8  
9 From the National Insurance Services we obtained information on participants who were  
10  
11 granted an early permanent disability benefit (n=55) during the follow-up period. We  
12  
13 excluded those individuals from the study, as a majority were diagnosed with mild to  
14  
15 moderate mental retardation, diagnoses within the autistic spectrum; or severe psychiatric  
16  
17 disorders like schizophrenia – conditions which were not compatible with high-school  
18  
19 graduation.  
20  
21

22  
23 Participants who died (n=43) during follow-up time were also excluded from the analyses,  
24  
25 leaving us with a total study group of n=13 964.  
26  
27

## 28 **Ethics**

29  
30  
31 The study was approved by the Regional Committee for Medical and Health Research Ethics  
32  
33 and by the Norwegian Data Inspectorate. These institutions gave permission for the use and  
34  
35 linkage of the data. The adolescent participants gave a written consent to link their  
36  
37 questionnaire data to national registers at a later date.  
38  
39

40  
41 Table 1 about here  
42

## 43 **Variables**

44  
45  
46 High-school dropouts  
47  
48

49  
50 From the National Education registry, we gained information on adolescents who had failed  
51  
52 to complete high school, which is the main outcome variable in this paper. In Norway,  
53  
54 adolescents normally enroll in high-school at age 15–16, immediately after finishing 10th  
55  
56 grade, which is the last year of compulsory schooling in Norway. Students are supposed to  
57  
58  
59  
60

1  
2  
3 complete high school within three years. Those who did not graduate within five years after  
4 registering as high-school students were defined for the purposes of this study as high-school-  
5 dropouts. [26]  
6  
7  
8  
9

#### 10 11 Use of health-care services 12

13  
14 In the baseline questionnaires, participants answered questions about help seeking from the  
15 health-care system over the 12 months prior to the survey, whether through school health  
16 services, youth health clinic, general practitioner (GP), or child and adolescent mental health  
17 services. The GP, the school health services and the youth health clinic in Norway are  
18 considered low-threshold parts of the primary health-care system, and are all free of charge  
19 for children and adolescents up to the age of 16. The services of child and adolescent mental  
20 health are paid for by the government, but a referral is required from a GP or another  
21 physician. To measure the use of health-care services, the contributors were given three  
22 response options – “none”, “1–3” or “4 or more” – for number of contacts during the past  
23 year. In our analyses, we aggregated contacts with the child and adolescent mental health  
24 services into two categories: “none” or “1 or more” contacts. The *reason* for visiting any of  
25 the service providers was not measured in the questionnaires.  
26  
27  
28  
29  
30  
31  
32  
33  
34  
35  
36  
37  
38  
39  
40  
41

#### 42 Health indicators 43

44  
45 At baseline, adolescents were asked questions concerning their health, including direct  
46 questions on specific conditions. As adjustment variables we used the baseline questions  
47 addressing the adolescents’ self-perceptions of the status of their general health, if they had or  
48 have had asthma or allergies, and conditions experienced in the 12 months prior to the survey:  
49 serious illness or injury; headache, abdominal pain, neck pain or shoulder pain, back pain or  
50 pain in extremities. The contributors could answer ‘yes’ or ‘no’ to these health and pain  
51  
52  
53  
54  
55  
56  
57  
58  
59  
60

1  
2  
3 questions. Self-rated health is a health measure which can predict later morbidity, mortality,  
4 health service use and early disability. [27] During adolescence, self-rated health status  
5 appears to be relatively stable, and it seems not to be changed by medical diagnoses or by  
6 mental or somatic health symptoms. [27] Self-rated health is considered to have good  
7 reliability for adults. [28] In the baseline questionnaire, self-rated health was categorised into  
8 four options: 'bad', 'not good', 'good' or 'very good'. In our analyses, we dichotomised this  
9 variable into two categories: 'very good or good' and 'not good or bad'. We also aggregated  
10 the pain variables into a dichotomous variable, in which three or more pain sites indicated a  
11 positive pain score and two or fewer indicated a negative pain score. We consider widespread  
12 pain to be an independent indicator of ill health. We also know from previous research that  
13 there is a certain comorbidity in adults between depressive disorders and chronic pain. [29]  
14 Level of mental health problems were scored using the Hopkin's Symptom Checklist-10  
15 (HSCL-10), a short-form of the Hopkin's Symptom Checklist-25 (SCL-25), and an  
16 instrument designed to diagnose depression in primary health care. [30] The HSCL-10  
17 includes ten questions about psychological symptoms experienced over the previous week and  
18 is validated for use both in general practice and in epidemiological studies. [31] A sum score  
19 above 1.6 indicates mild, moderate or severe depression among 14–16-year-olds.

## 20 Sociodemographics

21  
22 The sociodemographic background variables concerning parents' marital situation and  
23 household income were based on self-reports from the baseline questionnaires. The pupils  
24 were asked whether their parents' were 'married/living together'; 'divorced/separated'; 'one  
25 or both dead'; or 'other'. We chose to dichotomise these options into 'married/living together'  
26 or 'other'. The question concerning household income were categorised into 'very good';  
27 'good'; 'mediocre'; or 'poor'. Here we chose to collapse 'very good' and 'good' into one

1  
2  
3 category, which we used as the reference category. Information on parents' educational level  
4  
5 were provided by Statistics Norway. The highest accomplished educational level of one of the  
6  
7 parents were used, leaving us with four categories: 'higher college or university degree' (>4  
8  
9 years); 'lower college or university degree'; 'high school'; or 'primary school'.  
10  
11  
12  
13  
14  
15  
16  
17  
18  
19  
20  
21  
22  
23  
24  
25  
26  
27  
28  
29  
30  
31  
32  
33  
34  
35  
36  
37  
38  
39  
40  
41  
42  
43  
44  
45  
46  
47  
48  
49  
50  
51  
52  
53  
54  
55  
56  
57  
58  
59  
60

For peer review only

### Statistical analyses

Analyses of the data set were performed using multiple logistic regression analysis in SPSS version 19.0, with high-school dropout as the outcome variable. In the crude model, we tested the variables concerning health service usage separately and odds ratios were computed for high-school dropout. In the adjusted model, use of health-care services were adjusted for each other, for the selected health indicators and for sociodemographic background variables. All analyses were stratified by gender.



## RESULTS

Girls comprised 50.3% of our study group. Descriptive data of the population is presented in Table 1. Missing data caused by skipped questions concerning health-care seeking varied from 0.8% to 1.6%, while the questions on health had missing values from 1.1% to 6.5%. Follow-up data indicated that 28.9% of the students did not complete high school within five years (girls 23.8%, boys 34.2%). The descriptive baseline material revealed that 70% of the adolescents attended one or more health-care services over the previous year: school health services (girls 32.4%, boys 16.4%), youth health clinic (girls 21.1, boys 7.8%), GP (girls 59.5, boys 46.5%), child and adolescent mental health services (girls 6.9, boys 3.7%). Girls had substantially more contacts than did boys. A smaller number of the adolescents reported four or more contacts with school health services (girls 4.7, boys 0.9%) and the youth health clinic (girls 3.7, boys 0.6%), whereas 12.1% of the girls and 6.6% of the boys reported multiple contacts with a GP.

With few exceptions, adolescents who reported use of different health-care services during the past 12 months, generally reported more health problems, compared to those who reported no use of such health services (Table 2). Among frequent attenders ( $\geq 4$  visits), a substantially higher percentage reported health problems compared to those with moderate use of services. This was the case for both girls and boys.

Table 2 about here

As shown in Table 3, a higher rate of high school dropouts were observed among frequent attenders to the school health services (girls 36.5%, boys 48.3%) and the youth health clinic (girls 44.5, boys 71.1%), compared to those with no or moderate use (1–3 visits). Also adolescents referred to the mental health service had a higher dropout rate (girls 47.0, boys 62.2%). Boys with moderate use of a GP, had a lower dropout rate (29.8%).

1  
2  
3 Table 3 about here  
4  
5

6 Table 4 shows that visiting the child and adolescent mental health services at age 15–16 was  
7  
8 strongly associated with dropping out of high school five years later, in both genders (girls'  
9  
10 odds ratio 3.18, 95% confidence interval 2.63 to 3.84; boys 3.37, 2.60 to 4.37). Likewise,  
11  
12 seeking help at the youth health clinic (1–3 contacts: girls 1.83, 1.60 to 2.10; boys 1.64, 1.36  
13  
14 to 1.97.  $\geq 4$  contacts: girls 3.06, 2.37 to 3.95; boys 5.02, 2.48 to 10.14). The associations  
15  
16 remained significant after adjustment for use of other health care services, health indicators  
17  
18 and sociodemographic variables – except for boys with moderate use of the youth health  
19  
20 clinic. In the unadjusted analyses, attending the school health services was associated with  
21  
22 dropping out of high school (1–3: girls 1.15, 1.01 to 1.30; boys 1.36, 1.19 to 1.56.  $\geq 4$ : girls  
23  
24 2.02, 1.59 to 2.56; boys 1.93, 1.16 to 3.21), while after adjustments in girls, moderate use of  
25  
26 school health services had a slightly protective effect (0.82, 0.70 to 0.96).  
27  
28  
29  
30

31 Between 1 and 3 contacts with the GP the previous year was associated with a lower level of  
32  
33 high-school dropout in boys (0.73, 0.65 to 0.81). Boys who were regular users of a GP also  
34  
35 had a significant lower dropout rate in the adjusted model.  
36  
37  
38

39 Table 4 about here  
40  
41  
42  
43  
44  
45  
46  
47  
48  
49  
50  
51  
52  
53  
54  
55  
56  
57  
58  
59  
60

## DISCUSSION

### Main findings

Results revealed that 15–16-year-olds who attended the youth health clinic and those who saw the child and adolescent mental health services were significantly more likely to drop out of high school five years later than were those who did not seek help at these services. We also found that use of school health services was related to high school dropout, in both genders, but not after adjustments had been made. On the contrary, girls who reported 1-3 contacts with the school-based clinic the past year, had a slightly better outcome. Also boys who attended a GP regularly were more likely to continue to high-school graduation, which may indicate a protective effect of having a regular and stable relationship with a GP.

### Strengths and weaknesses

The substantial number of participants in geographical diverse areas, along with a high response rate and few missing data constitute strengths of this prospective community study.

The adolescent study sample should be representative, therefore, for a general youth population. Furthermore, the compulsory Norwegian registries provided us with complete, reliable follow-up material. The prospective-longitudinal design provided the opportunity to observe a temporal order of events on an individual level, and it can be argued that the power is stronger compared to that of a cross-sectional design. One should be careful, however, not to draw conclusions about causal relationships, given the observational nature of the study.

The baseline survey was conducted in six Norwegian counties in both urban and rural areas and encompasses the entire youth population in these regions. Yet, because local variations in the accessibility of health-care services can influence help-seeking behaviour, our results may not be applicable in all settings.

1  
2  
3 One limitation of the questions concerning health – variables which were adjusted for in the  
4 analyses – is the lack of information they provide on the severity or chronicity of conditions.  
5  
6 Furthermore, the help-seeking variables in the baseline survey provide no reasons for the  
7  
8 adolescents' encounters with the health system. Self-reports can imply an underestimation of  
9  
10 health service usage, especially use of mental health services. Other health problems than  
11  
12 those adjusted for in our analyses could have influenced help-seeking behaviour and failure to  
13  
14 complete high school. Yet disability benefits acquired at a young age were considered to have  
15  
16 been the result of the most serious health disabilities, and were therefore excluded from our  
17  
18 sample.  
19  
20  
21  
22  
23

24 A recent validation study confirms that the HSCL-10 instrument, which we have used to  
25  
26 measure mental health problems, is a suitable diagnostic tool for adolescents in this age  
27  
28 group, and is also found to be appropriate for use in epidemiological studies. [31] Although  
29  
30 our cutoff point of 1.6 has been validated as optimal for detecting mild, moderate and severe  
31  
32 depression in 14–16-year-olds of both genders, [31] it can be argued that this cutoff may be  
33  
34 low, and could thereby define an unreasonably large proportion of adolescents as depressed.  
35  
36 [32, 33] Another constraint is lack of a measure of other types of mental health problems.  
37  
38  
39

40 High-school dropout has been chosen as the outcome variable because it is an early marker  
41  
42 for later work marginalisation and social exclusion. [11, 20, 21] Previous studies indicate that  
43  
44 those who drop out of high school have a higher risk of becoming dependent on welfare  
45  
46 benefits in adult life, including receipt of an early disability pension. [11, 34, 35] It can be  
47  
48 argued that the five-year limit is strict, but it is consistent with other studies on school  
49  
50 dropout, and few of those who fail to complete high school within five years succeed in  
51  
52 finishing later. [26] [19]  
53  
54  
55  
56  
57  
58  
59  
60

### Comparison with previous research

We do not imply that health service use in adolescence causes high-school dropout, rather that it is a proxy for problems which can be independent risk factors for dropout. Even though several studies confirm an under-use of health care among adolescents who struggle with somatic and mental health issues, [1, 36] both previous research [7] and the descriptive material in our study, as shown in Table 2, confirm that help seekers constitute a group which generally have a greater load of health problems compared to non-seekers, and should receive special attention. Both structural and individual factors influence help seeking. [36, 37] From previous research we know that such sociodemographic characteristics as economic status and parents' educational level influence both help seeking [2, 7] and high school graduation. [8, 19] Health complaints which commonly lead adolescents to seek help can also influence them to drop out. After correcting for such factors in our analyses, we found a negative outcome in adolescents seeking help at the youth health clinic and the mental health services, indicating that they have other challenges that can explain their higher probability of dropping out. On the other hand, help seekers may have resources and certain personal qualities that enable them to recognise and cope with their problems – a characteristic for which we cannot correct in the analyses. [3]

Youth health clinics in Norway provide free advice and prescriptions for birth control and treatment of sexually transmitted diseases. In addition, it is a low-threshold service centre where adolescents can consult a nurse or a physician about mental health issues. Visiting the youth health clinic multiple times at 15–16 years of age can indicate sexual debut at an early age. We know that adolescent pregnancy is a risk factor for lower educational achievement, [18] but less is known about early sexual activity in general and failure to complete high school. A previous study has shown associations between low academic achievement and

1  
2  
3 high level of externalising behaviour and early sexual debut in both genders. [38] A US study  
4  
5 on adolescents receiving mental health treatment shows associations between both  
6  
7 externalising and internalising psychiatric disorders and sexual risk-taking behaviour. [39] To  
8  
9 the best of our knowledge, there is limited research on boys who attend the youth health clinic  
10  
11 or similar services, and there are few boys in our sample with multiple encounters. Those who  
12  
13 have multiple encounters, however, have a dropout rate above 70%. Our results indicate that  
14  
15 health workers in youth health clinics should be aware of and offer follow-up to adolescents  
16  
17 with multiple visits.  
18  
19

20  
21  
22 In the crude model, adolescent attenders to the school health services generally had a higher  
23  
24 level of high school dropout. After adjustments, though, girls with moderate attendance turned  
25  
26 out to have slightly lower odds for dropout. A recent US study has found an association  
27  
28 between low to moderate use of school-based health centres and reduction of dropout for high  
29  
30 school students, [40] a finding which is in line with our result. The American school-based  
31  
32 health centres, however, offer a wider range of health services than do school health services  
33  
34 in Norway, and are therefore not directly comparable.  
35  
36

37  
38 We found that consulting the child and adolescent mental health services was associated with  
39  
40 lower odds for graduating from high school. Because a referral is needed in order to see the  
41  
42 mental health services, we argue that individuals who qualify for specialised therapy usually  
43  
44 have relatively severe mental health problems. A previous study has shown that there is a  
45  
46 dose-response association between help-seeking for mental health problems and symptom  
47  
48 load of anxiety and depression. [41] Furthermore, early-onset mental disorders have been  
49  
50 shown to be associated with lower educational attainment. [12, 13] It is not surprising, then,  
51  
52 that the outcome in the group consulting mental health services at age 15–16 is less fortunate.  
53  
54  
55  
56  
57  
58  
59  
60

1  
2  
3 Boys who saw a GP regularly were more likely to graduate from high school than their peers,  
4  
5 although there was no such statistically significant relationship for girls. This finding suggests  
6  
7 that, for boys, having a stable relationship with a GP in their adolescent years can have a  
8  
9 positive impact. Yet whereas we assume that the boys who use GP services are consulting for  
10  
11 health problems and that they are helped in some way, they may also have individual  
12  
13 resources which explain their better outcomes. Teenage boys have a substantially lower use of  
14  
15 health-care services than girls do, including seeing a GP. [42] They are also more reluctant to  
16  
17 seek help for emotional problems unless severely distressed. [37, 43]  
18  
19

### 20 21 22 **Implications for policy and practice** 23

24  
25 Previous research confirms that adolescents have frequent encounters with the primary health-  
26  
27 care services every year, [4, 44, 45] which is consistent with our findings. These contacts  
28  
29 provide golden opportunities to uncover somatic health problems and mental distress. Health  
30  
31 workers in the primary health-care services should pay particular attention to adolescents with  
32  
33 multiple health service encounters and offer follow-up when needed. It is also important to  
34  
35 refer to the specialist services when the severity of the condition calls for it. Our results may  
36  
37 suggest that by the time adolescents are referred to second-line mental health services, their  
38  
39 conditions are well entrenched and the prognosis is consequently more negative.  
40  
41

42  
43  
44 Youth health clinics are low-threshold services which are visited by a substantial number of  
45  
46 adolescents every year – especially young girls. Considering the high probability of dropping  
47  
48 out among attenders of this service, as shown in our study, health workers should be advised  
49  
50 to focus particularly on these adolescents and the quality of their treatment.  
51

52  
53  
54 Whereas girls report more health problems and a higher level of health service usage than  
55  
56 boys do, they are more likely to graduate from high school – a divergence that calls for a  
57  
58  
59  
60

1  
2  
3 broader approach to the relationship between health and failure to complete high school. More  
4  
5 research is needed to disentangle the role of health services in dealing with adolescent health  
6  
7 and possible preventive potential for adolescents' symptom load and functional impairment in  
8  
9 the following years.  
10  
11  
12  
13  
14  
15  
16  
17  
18  
19  
20  
21  
22  
23  
24  
25  
26  
27  
28  
29  
30  
31  
32  
33  
34  
35  
36  
37  
38  
39  
40  
41  
42  
43  
44  
45  
46  
47  
48  
49  
50  
51  
52  
53  
54  
55  
56  
57  
58  
59  
60

For peer review only



## Acknowledgements

The data collection was carried out and funded by the Norwegian Institute of Public Health in collaboration with the University of Oslo.

We also acknowledge statistician Tore Wentzel-Larsen at the Norwegian Centre for Violence and Traumatic Stress Studies/Centre for Child and Adolescent Mental Health, Eastern and Southern Norway, Oslo, Norway for helping out with preparing the data for analyses.

**Contributors:** All three authors contributed to the study design, discussions of the results and writing of the final paper. LH prepared the data, undertook the primary analyses and the first interpretations and wrote the first draft of the paper. ORH and EOR supervised the analyses and critically reviewed the paper. ORH and EOR also took part in planning and conducting the original baseline survey. All authors approved the submitted version.

**Funding:** The study was funded by the Norwegian Research Council.

**Competing interests:** All authors have completed the Unified Competing Interest form at [www.icmje.org/coi\\_disclosure.pdf](http://www.icmje.org/coi_disclosure.pdf) (available on request from the corresponding author) and declare no competing interests.

**Ethical approval:** The study was approved by the Norwegian Institute of Public Health, Statistics Norway, the Ministry of Education and Research and the Medical Ethics Committee. These institutions gave permission for the use and linkage of the data. The adolescent participants gave written consent to link their questionnaire data to national registers at a later date.

**Data sharing:** no additional data available.

**Copyright:** The Corresponding Author has the right to grant on behalf of all authors and does grant on behalf of all authors, a worldwide licence to the Publishers and its licensees in perpetuity, in all forms, formats and media (whether known now or created in the future), to i) publish, reproduce, distribute, display and store the Contribution, ii) translate the Contribution into other languages, create adaptations, reprints, include within collections and create summaries, extracts and/or, abstracts of the Contribution, iii) create any other derivative work(s) based on the Contribution, iv) to exploit all subsidiary rights in the Contribution, v) the inclusion of electronic links from the Contribution to third party material where-ever it may be located; and, vi) licence any third party to do any or all of the above.

**WHAT IS ALREADY KNOWN ON THIS TOPIC**

High school dropouts are at risk of later marginalisation.

Poor physical and mental health is related to dropping out from high school.

Adolescents who use health care services constitute a vulnerable group.

**WHAT THIS STUDY ADDS**

Adolescents who see the child and adolescent mental health services at age 15, are more likely to drop out from high school, compared to their peers.

Adolescents who attend youth health clinics could be at risk of high school dropout.

Boys who attend a GP and girls who visit the school health clinic regularly are less likely to become high school dropouts.

Review only

## References

1. Britto MT, Klostermann BK, Bonny AE, et al. Impact of a school-based intervention on access to healthcare for underserved youth. *The Journal of adolescent health : official publication of the Society for Adolescent Medicine* 2001;**29**(2):116-24.
2. Eisenberg D, Golberstein E, Gollust SE. Help-seeking and access to mental health care in a university student population. *Medical care* 2007;**45**(7):594-601 doi: 10.1097/MLR.0b013e31803bb4c1[published Online First: 27 Jul 2001].
3. Zwaanswijk M, Verhaak PF, Bensing JM, et al. Help seeking for emotional and behavioural problems in children and adolescents: a review of recent literature. *European child & adolescent psychiatry* 2003;**12**(4):153-61 doi: 10.1007/s00787-003-0322-6[published Online First: 16 Jun 2007].
4. Mauerhofer A, Berchtold A, Michaud PA, et al. GPs' role in the detection of psychological problems of young people: a population-based study. *The British journal of general practice : the journal of the Royal College of General Practitioners* 2009;**59**(566):e308-14 doi: 10.3399/bjgp09X454115[published Online First: 19 Sept 2009].
5. Flament MF, Cohen D, Choquet M, et al. Phenomenology, psychosocial correlates, and treatment seeking in major depression and dysthymia of adolescence. *Journal of the American Academy of Child and Adolescent Psychiatry* 2001;**40**(9):1070-8 doi: 10.1097/00004583-200109000-00016[published Online First: 15 Sept 2001].
6. Offer D, Howard KI, Schonert KA, et al. To whom do adolescents turn for help? Differences between disturbed and nondisturbed adolescents. *Journal of the American Academy of Child and Adolescent Psychiatry* 1991;**30**(4):623-30 doi: 10.1097/00004583-199107000-00015[published Online First: 1 Jul 1991].
7. Vila M, Kramer T, Obiols JE, et al. Adolescents who are frequent attenders to primary care: contribution of psychosocial factors. *Social psychiatry and psychiatric epidemiology* 2010 doi: 10.1007/s00127-010-0326-8[published Online First: 21 Dec 2010].
8. Freudenberg N, Ruglis J. Reframing school dropout as a public health issue. *Preventing chronic disease* 2007;**4**(4).
9. Suhrcke M, de Paz Nieves, C. The impact of health and health behaviours on educational outcomes in high-income countries: a review of the evidence: Copenhagen, WHO Regional Office for Europe, 2011.
10. Maslow GR, Haydon AA, Ford CA, et al. Young adult outcomes of children growing up with chronic illness: an analysis of the National Longitudinal Study of Adolescent Health. *Archives of pediatrics & adolescent medicine* 2011;**165**(3):256-61 ].
11. Gravseth HM, Bjerkedal T, Irgens LM, et al. Life course determinants for early disability pension: a follow-up of Norwegian men and women born 1967-1976. *European journal of epidemiology* 2007;**22**(8):533-43 doi: 10.1007/s10654-007-9139-9[published Online First: 29 May 2007].
12. Breslau J, Lane M, Sampson N, et al. Mental disorders and subsequent educational attainment in a US national sample. *Journal of psychiatric research* 2008;**42**(9):708-16 doi: 10.1016/j.jpsychires.2008.01.016[published Online First: 12 Mar 2008].
13. Stoep AV, Weiss NS, Kuo ES, et al. What proportion of failure to complete secondary school in the US population is attributable to adolescent psychiatric disorder? *The journal of behavioral health services & research* 2003;**30**(1):119-24.
14. Fletcher JM. Adolescent depression: diagnosis, treatment, and educational attainment. *Health economics* 2008;**17**(11):1215-35 doi: 10.1002/hec.1319[published Online First: 25 Dec 2007].

15. Needham BL. Adolescent depressive symptomatology and young adult educational attainment: an examination of gender differences. *The Journal of adolescent health : official publication of the Society for Adolescent Medicine* 2009;**45**(2):179-86 doi: 10.1016/j.jadohealth.2008.12.015[published Online First: 25 Jul 2009].
16. Markussen E, Seland I. Å redusere bortvalg - bare skolens ansvar? En undersøkelse av bortvalg ved de videregående skolene i Akershus fylkeskommune skoleåret 2010-2011. NIFU: Nordic Institute for Studies in Innovation, Research and Education, 2012.
17. Townsend L, Flisher AJ, King G. A systematic review of the relationship between high school dropout and substance use. *Clinical child and family psychology review* 2007;**10**(4):295-317.
18. Hofferth SL, Reid L, Mott FL. The effects of early childbearing on schooling over time. *Family planning perspectives* 2001;**33**(6):259-67.
19. Bratsberg B, Raaum O, Røed K, et al. Utdannings- og arbeidskarrierer hos unge voksne: Hvor havner ungdom som slutter skolen i ung alder? Frisch Report 3: Ragnar Frisch Centre for Economic Research, 2010.
20. De Ridder KA, Pape K, Johnsen R, et al. School dropout: a major public health challenge: a 10-year prospective study on medical and non-medical social insurance benefits in young adulthood, the Young-HUNT 1 Study (Norway). *Journal of epidemiology and community health* 2012 doi: 10.1136/jech-2011-200047[published Online First: 9 Febr 2012].
21. Bruusgaard D, Smeby L, Claussen B. Education and disability pension: a stronger association than previously found. *Scandinavian journal of public health* 2010;**38**(7):686-90 doi: 10.1177/1403494810378916[published Online First: 20 Aug 2010].
22. Avendano M, Jurges H, Mackenbach JP. Educational level and changes in health across Europe: longitudinal results from SHARE. *J Eur Soc Policy* 2009;**19**(4):301-16.
23. Geijerstam C. *Tidlig arbeidsledighet og marginalisering*. Contributor, Universitetet i Oslo Økonomisk institutt Ragnar Frisch Centre for Economic Research, 2001.
24. Søgaard A, Eide, T. The Oslo Health Study (HUBRO) – The Youth part (UNGHUBRO). Aims, Materials and Methods (online), 2005. Retrieved from <http://www.fhino/dav/AD07555E4Bdoc> (accessed 24 Jun 2013).
25. [http://www.fhi.no/eway/default.aspx?pid=238&trg=MainArea\\_5811&MainArea\\_5811=5895:0:15,4438:1:0:0:::0:0](http://www.fhi.no/eway/default.aspx?pid=238&trg=MainArea_5811&MainArea_5811=5895:0:15,4438:1:0:0:::0:0) (accessed 9 Apr 2013).
26. Falch T, Nyhus OH. High school dropout and labour market attachments among young adults. Centre for Economic research: NTNU, 2009.
27. Breidablik HJ, Meland E, Lydersen S. Self-rated health during adolescence: stability and predictors of change (Young-HUNT study, Norway). *European journal of public health* 2009;**19**(1):73-8.
28. Lundberg O, Manderbacka K. Assessing reliability of a measure of self-rated health. *Scandinavian journal of social medicine* 1996;**24**(3):218-24.
29. Bair MJ, Robinson RL, Katon W, et al. Depression and pain comorbidity: a literature review. *Archives of internal medicine* 2003;**163**(20):2433-45 ].
30. Strand BH, Dalgard OS, Tambs K, et al. Measuring the mental health status of the Norwegian population: a comparison of the instruments SCL-25, SCL-10, SCL-5 and MHI-5 (SF-36). *Nordic journal of psychiatry* 2003;**57**(2):113-8.
31. Haavet OR, Sirpal MK, Haugen W, et al. Diagnosis of depressed young people in primary health care--a validation of HSCL-10. *Family practice* 2011;**28**(2):233-7 doi: 10.1093/fampra/cm078[published Online First: 13 Oct 2010].

- 1
  - 2
  - 3
  - 4
  - 5
  - 6
  - 7
  - 8
  - 9
  - 10
  - 11
  - 12
  - 13
  - 14
  - 15
  - 16
  - 17
  - 18
  - 19
  - 20
  - 21
  - 22
  - 23
  - 24
  - 25
  - 26
  - 27
  - 28
  - 29
  - 30
  - 31
  - 32
  - 33
  - 34
  - 35
  - 36
  - 37
  - 38
  - 39
  - 40
  - 41
  - 42
  - 43
  - 44
  - 45
  - 46
  - 47
  - 48
  - 49
  - 50
  - 51
  - 52
  - 53
  - 54
  - 55
  - 56
  - 57
  - 58
  - 59
  - 60
32. Angold A, Costello EJ, Farmer EM, et al. Impaired but undiagnosed. *Journal of the American Academy of Child and Adolescent Psychiatry* 1999;**38**(2):129-37 doi: 10.1097/00004583-199902000-00011[published Online First: 10 Febr 1999].
33. Fergusson DM, Horwood LJ, Ridder EM, et al. Subthreshold depression in adolescence and mental health outcomes in adulthood. *Archives of general psychiatry* 2005;**62**(1):66-72 doi: 10.1001/archpsyc.62.1.66[published Online First: 5 Jan 2005].
34. Gjesdal S, Ringdal PR, Haug K, et al. Long-term sickness absence and disability pension with psychiatric diagnoses: a population-based cohort study. *Nordic journal of psychiatry* 2008;**62**(4):294-301 doi: 10.1080/08039480801984024[published Online First: 16 Jul 2008].
35. Wilford J, McMahon AD, Peters J, et al. Predicting job loss in those off sick. *Occupational medicine* 2008;**58**(2):99-106 doi: 10.1093/occmed/kqm141[published Online First: 25 Jan 2008].
36. Zwaanswijk M, Van der Ende J, Verhaak PF, et al. Factors associated with adolescent mental health service need and utilization. *Journal of the American Academy of Child and Adolescent Psychiatry* 2003;**42**(6):692-700 doi: 10.1097/01.CHI.0000046862.56865.B7[published Online First: 19 Aug 2003].
37. Barker G, Olukoya A, Aggleton P. Young people, social support and help-seeking. *International journal of adolescent medicine and health* 2005;**17**(4):315-35.
38. Price MN, Hyde JS. When two isn't better than one: predictors of early sexual activity in adolescence using a cumulative risk model. *Journal of youth and adolescence* 2009;**38**(8):1059-71 .
39. Brown LK, Hadley W, Stewart A, et al. Psychiatric disorders and sexual risk among adolescents in mental health treatment. *Journal of consulting and clinical psychology* 2010;**78**(4):590-7 doi: 10.1037/a0019632[published Online First: 28 Jul 2010].
40. Kerns SE, Pullmann MD, Walker SC, et al. Adolescent use of school-based health centers and high school dropout. *Archives of pediatrics & adolescent medicine* 2011;**165**(7):617-23 .
41. Zachrisson HD, Rodje K, Mykletun A. Utilization of health services in relation to mental health problems in adolescents: a population based survey. *BMC public health* 2006;**6**:34 doi: 10.1186/1471-2458-6-34[published Online First: 17 Febr 2006].
42. Marcell AV, Klein JD, Fischer I, et al. Male adolescent use of health care services: where are the boys? *The Journal of adolescent health : official publication of the Society for Adolescent Medicine* 2002;**30**(1):35-43.
43. Biddle L, Gunnell D, Sharp D, et al. Factors influencing help seeking in mentally distressed young adults: a cross-sectional survey. *The British journal of general practice : the journal of the Royal College of General Practitioners* 2004;**54**(501):248-53.
44. Haavet OR, Straand J, Hjortdahl P, et al. Do negative life experiences predict the health-care-seeking of adolescents? A study of 10th-year students in Oslo, Norway. *The Journal of adolescent health : official publication of the Society for Adolescent Medicine* 2005;**37**(2):128-34 doi: 10.1016/j.jadohealth.2004.08.031[published Online First: 20 Jul 2005].
45. Santelli J, Klein J, Graff C, et al. Reliability in adolescent reporting of clinician counseling, health care use, and health behaviors. *Medical care* 2002;**40**(1):26-37.

Table 1 Descriptive characteristics of the study population (N=13964) at baseline, 2000–2004, and at follow-up, 2010.

| <b>At baseline:</b>                     |                                       |          |          |
|-----------------------------------------|---------------------------------------|----------|----------|
|                                         |                                       | <b>N</b> | <b>%</b> |
| <b>Gender</b>                           |                                       |          |          |
|                                         | Girls                                 | 7019     | 50.3     |
|                                         | Boys                                  | 6945     | 49.7     |
| <b>Sociodemographic characteristics</b> |                                       |          |          |
| <b>Ethnicity</b>                        |                                       |          |          |
|                                         | Ethnic Norwegian                      | 12155    | 87.0     |
|                                         | 1 <sup>st</sup> generation immigrant  | 1126     | 8.1      |
|                                         | 2 <sup>nd</sup> generation immigrant  | 683      | 4.9      |
| <b>Parents' educational level</b>       |                                       |          |          |
|                                         | College or university degree >4 years | 1937     | 13.9     |
|                                         | College or university degree ≤4 years | 4277     | 30.6     |
|                                         | High school                           | 5681     | 40.7     |
|                                         | Primary school                        | 1864     | 13.3     |
|                                         | Missing                               | 205      | 1.5      |
| <b>Parents' marital status</b>          |                                       |          |          |
|                                         | Married or living together            | 9255     | 66.3     |
|                                         | Other                                 | 4600     | 32.9     |
|                                         | Missing                               | 109      | 0.8      |
| <b>Household income</b>                 |                                       |          |          |
|                                         | Very good or good                     | 8732     | 62.5     |
|                                         | Mediocre                              | 4546     | 32.6     |
|                                         | Poor                                  | 457      | 3.3      |
|                                         | Missing                               | 229      | 1.6      |
| <b>Status at follow-up:</b>             |                                       |          |          |
| <b>High school drop-out</b>             |                                       |          |          |
|                                         | Total                                 | 4040     | 28.9     |
|                                         | Girls                                 | 1668     | 23.8     |
|                                         | Boys                                  | 2372     | 34.2     |

Table 2: Percentage of 15–16-year-olds reporting different health problems within type and level of reported health care use, all numbers stratified by gender (N=13964)

|                                                      | Asthma         |               | Allergy        |               | Poor self-perceived health |               | Experienced serious illness/injury past 12 months |               | Pain sites $\geq 3$ past 12 months |               | HSCL10 $\geq 1.6$ |               |
|------------------------------------------------------|----------------|---------------|----------------|---------------|----------------------------|---------------|---------------------------------------------------|---------------|------------------------------------|---------------|-------------------|---------------|
|                                                      | Girls<br>N (%) | Boys<br>N (%) | Girls<br>N (%) | Boys<br>N (%) | Girls<br>N (%)             | Boys<br>N (%) | Girls<br>N (%)                                    | Boys<br>N (%) | Girls<br>N (%)                     | Boys<br>N (%) | Girls<br>N (%)    | Boys<br>N (%) |
| <b>Total numbers reporting health problems</b>       | 910 (13.7)     | 897 (13.5)    | 2756 (41.0)    | 2448 (36.5)   | 960 (13.9)                 | 645 (9.4)     | 606 (9.2)                                         | 651 (9.9)     | 2683 (40.4)                        | 1473 (22.3)   | 2390 (35.2)       | 906 (13.4)    |
| <b>Within self-reported level of health care use</b> |                |               |                |               |                            |               |                                                   |               |                                    |               |                   |               |
| <i>School health services</i>                        |                |               |                |               |                            |               |                                                   |               |                                    |               |                   |               |
| None                                                 | 565 (12.7)     | 726 (13.2)    | 1758 (39.1)    | 2008 (36.1)   | 556 (12.1)                 | 492 (8.7)     | 351 (8.0)                                         | 498 (9.1)     | 1555 (35.0)                        | 1135 (20.7)   | 1415 (31.1)       | 688 (12.2)    |
| 1-3                                                  | 270 (15.0)     | 150 (14.8)    | 821 (44.8)     | 398 (38.8)    | 296 (15.7)                 | 132 (12.5)    | 189 (10.6)                                        | 133 (13.3)    | 894 (48.8)                         | 298 (29.7)    | 750 (40.3)        | 194 (18.9)    |
| $\geq 4$                                             | 63 (20.7)      | 8 (13.3)      | 150 (48.1)     | 20 (35.1)     | 86 (26.8)                  | 10 (16.7)     | 54 (17.9)                                         | 11 (19.3)     | 201 (65.3)                         | 24 (41.4)     | 200 (63.3)        | 22 (36.7)     |
| <i>Youth health clinic</i>                           |                |               |                |               |                            |               |                                                   |               |                                    |               |                   |               |
| None                                                 | 671 (12.8)     | 796 (13.1)    | 2093 (39.6)    | 2214 (36.2)   | 679 (12.6)                 | 553 (8.8)     | 433 (8.3)                                         | 567 (9.4)     | 1922 (36.8)                        | 1289 (21.3)   | 1709 (32.1)       | 786 (12.7)    |
| 1-3                                                  | 183 (16.3)     | 79 (16.9)     | 533 (46.5)     | 191 (40.6)    | 201 (16.9)                 | 70 (14.4)     | 138 (12.5)                                        | 68 (14.8)     | 591 (51.8)                         | 150 (32.3)    | 524 (44.7)        | 103 (21.5)    |
| $\geq 4$                                             | 49 (20.3)      | 5 (13.5)      | 114 (46.5)     | 11 (30.6)     | 67 (26.4)                  | 7 (18.4)      | 34 (14.3)                                         | 7 (19.4)      | 150 (61.7)                         | 13 (36.1)     | 146 (57.9)        | 12 (33.3)     |
| <i>General practitioner</i>                          |                |               |                |               |                            |               |                                                   |               |                                    |               |                   |               |
| None                                                 | 237 (8.8)      | 365 (10.4)    | 870 (32.2)     | 1128 (31.9)   | 258 (9.3)                  | 301 (8.3)     | 108 (4.1)                                         | 192 (5.5)     | 805 (30.2)                         | 605 (17.3)    | 796 (29.2)        | 437 (12.2)    |
| 1-3                                                  | 485 (15.6)     | 410 (15.6)    | 1413 (44.8)    | 1074 (40.7)   | 466 (14.4)                 | 255 (9.4)     | 284 (9.2)                                         | 314 (12.0)    | 1377 (44.0)                        | 680 (26.1)    | 1155 (36.3)       | 373 (13.9)    |
| $\geq 4$                                             | 178 (22.8)     | 105 (24.4)    | 450 (56.2)     | 208 (47.5)    | 223 (27.1)                 | 73 (16.2)     | 211 (27.4)                                        | 137 (32.2)    | 480 (60.2)                         | 163 (38.6)    | 422 (51.7)        | 90 (20.4)     |
| <i>Child and adolescent mental health services</i>   |                |               |                |               |                            |               |                                                   |               |                                    |               |                   |               |
| None                                                 | 810 (13.2)     | 834 (13.2)    | 2499 (40.3)    | 2323 (36.3)   | 793 (12.5)                 | 584 (8.9)     | 525 (8.6)                                         | 601 (9.6)     | 2383 (38.8)                        | 1361 (21.6)   | 2046 (32.6)       | 803 (12.4)    |
| $\geq 1$                                             | 87 (19.5)      | 47 (19.5)     | 238 (51.7)     | 96 (39.8)     | 147 (31.5)                 | 46 (18.5)     | 76 (17.7)                                         | 43 (18.5)     | 272 (60.0)                         | 90 (37.5)     | 323 (69.5)        | 96 (40.5)     |

Table 3: Health care seeking behaviour and health indicators in 15–16-year-olds and percentage of high school dropout 5 years later (N=13 964)

| Self-reported level of health care use             | Girls       |           | Boys        |           |
|----------------------------------------------------|-------------|-----------|-------------|-----------|
|                                                    | N(%)        | Dropout % | N(%)        | Dropout % |
| <b>School health services</b>                      |             |           |             |           |
| None                                               | 4690 (67.7) | 22.2      | 5728 (83.6) | 32.7      |
| 1-3                                                | 1917 (27.7) | 24.6      | 1064 (15.5) | 39.8      |
| ≥4                                                 | 323 (4.7)   | 36.5      | 60 (0.9)    | 48.3      |
| <b>Youth health clinic</b>                         |             |           |             |           |
| None                                               | 5496 (79.0) | 20.8      | 6314 (92.3) | 32.8      |
| 1-3                                                | 1209 (17.4) | 32.4      | 490 (7.2)   | 44.5      |
| ≥4                                                 | 256 (3.7)   | 44.5      | 38 (0.6)    | 71.1      |
| <b>General practitioner</b>                        |             |           |             |           |
| None                                               | 2808 (40.5) | 23.4      | 3653 (53.4) | 36.8      |
| 1-3                                                | 3289 (47.4) | 22.5      | 2729 (39.9) | 29.8      |
| ≥4                                                 | 841 (12.1)  | 27.8      | 453 (6.6)   | 36.0      |
| <b>Child and adolescent mental health services</b> |             |           |             |           |
| None                                               | 6463 (93.1) | 21.8      | 6590 (96.3) | 32.8      |
| ≥1                                                 | 477 (6.9)   | 47.0      | 251 (3.7)   | 62.2      |
| <b>Health indicators</b>                           |             |           |             |           |
| <b>Asthma</b>                                      |             |           |             |           |
| None                                               | 5730 (86.3) | 23.1      | 5753 (86.5) | 33.3      |
| Yes                                                | 910 (13.7)  | 27.1      | 897 (13.5)  | 37.9      |
| <b>Allergy</b>                                     |             |           |             |           |
| None                                               | 3958 (59.0) | 21.9      | 4261 (63.5) | 33.5      |
| Yes                                                | 2756 (41.0) | 25.9      | 2448 (36.5) | 34.4      |
| <b>Self-perceived health</b>                       |             |           |             |           |
| Very good/good                                     | 5932 (86.1) | 21.8      | 6227 (90.6) | 32.8      |
| Not good/poor                                      | 960 (13.9)  | 36.8      | 645 (9.4)   | 46.8      |
| <b>Serious illness/injury past 12 months</b>       |             |           |             |           |
| None                                               | 5956 (90.8) | 23.1      | 5929 (90.1) | 33.4      |
| Yes                                                | 606 (9.2)   | 24.1      | 651 (9.9)   | 37.2      |
| <b>Pain sites reported past 12 months</b>          |             |           |             |           |
| <3                                                 | 3917 (59.6) | 19.6      | 5107 (77.7) | 31.6      |
| ≥3                                                 | 2463 (40.4) | 29.3      | 1385 (22.3) | 42.2      |
| <b>HSCL10</b>                                      |             |           |             |           |
| <1.6                                               | 4391 (64.8) | 19.3      | 5848 (86.6) | 31.8      |
| ≥1.6                                               | 2390 (35.2) | 30.5      | 906 (13.4)  | 45.7      |
| <b>Sociodemographic variables</b>                  |             |           |             |           |
| <b>Ethnicity</b>                                   |             |           |             |           |
| Ethnic Norwegian                                   | 6115 (87.1) | 22.5      | 6040 (87.0) | 31.8      |
| 1 <sup>st</sup> generation immigrant               | 580 (8.3)   | 36.7      | 546 (7.9)   | 53.7      |
| 2 <sup>nd</sup> generation immigrant               | 324 (4.6)   | 25.0      | 359 (5.2)   | 43.7      |
| <b>Parents' marital status</b>                     |             |           |             |           |
| Married/living together                            | 4655 (66.6) | 18.4      | 4600 (67.0) | 28.8      |
| Other                                              | 2335 (33.4) | 34.2      | 2265(33.0)  | 44.1      |
| <b>Household income</b>                            |             |           |             |           |
| Very good or good                                  | 4212 (60.9) | 20.2      | 4520 (66.2) | 31.9      |
| Mediocre                                           | 2450 (35.4) | 27.3      | 2096 (30.7) | 36.2      |
| Poor                                               | 250 (3.6)   | 45.6      | 207 (3.0)   | 48.3      |
| <b>Parents' educational level</b>                  |             |           |             |           |
| College/university degree >4 years                 | 1001 (14.5) | 7.6       | 936 (13.7)  | 12.8      |
| College/university degree ≤4 years                 | 2135 (30.9) | 14.3      | 2142 (31.3) | 24.2      |



Table 3: Health care seeking behaviour and health indicators in 15–16-year-olds and percentage of high school dropout 5 years later (N=13 964)

|                |             |      |             |      |
|----------------|-------------|------|-------------|------|
| High school    | 2867 (41.4) | 29.1 | 2814 (41.1) | 39.5 |
| Primary school | 915 (13.2)  | 44.3 | 949 (13.9)  | 59.1 |

For peer review only

1  
2  
3  
4  
5  
6  
7  
8  
9  
10  
11  
12  
13  
14  
15  
16  
17  
18  
19  
20  
21  
22  
23  
24  
25  
26  
27  
28  
29  
30  
31  
32  
33  
34  
35  
36  
37  
38  
39  
40  
41  
42  
43  
44  
45  
46  
47  
48  
49  
50  
51  
52  
53  
54  
55  
56  
57  
58  
59  
60

Table 3: Health care seeking behaviour and health indicators in 15–16-year-olds and percentage of high school dropout 5 years later (N=13 964)

For peer review only

Table 4: Associations between health care seeking behaviour evaluated in 10<sup>th</sup> grade adolescents and high school drop-out five years later. Investigated using multiple logistic regression analysis.

| Self-reported level of health care use             |            | Crude                         |                                | Adjusted†                     |                               |
|----------------------------------------------------|------------|-------------------------------|--------------------------------|-------------------------------|-------------------------------|
|                                                    |            | Girls                         | Boys                           | Girls                         | Boys                          |
|                                                    |            | OR (95% CI) ††                | OR (95% CI)                    | OR (95% CI)                   | OR (95% CI)                   |
| <b>School health services</b>                      | None (ref) |                               |                                |                               |                               |
|                                                    | 1-3        | <b>1.15 (1.01 to 1.30)*</b>   | <b>1.36 (1.19 to 1.56)***</b>  | <b>0.82 (0.70 to 0.96)*</b>   | 1.15 (0.97 to 1.36)           |
|                                                    | ≥4         | <b>2.02 (1.59 to 2.56)***</b> | <b>1.93 (1.16 to 3.21)*</b>    | 0.86 (0.63 to 1.17)           | 0.71 (0.37 to 1.36)           |
| <b>Youth health clinic</b>                         | None (ref) |                               |                                |                               |                               |
|                                                    | 1-3        | <b>1.83 (1.60 to 2.10)***</b> | <b>1.64 (1.36 to 1.97)***</b>  | <b>1.72 (1.45 to 2.04)***</b> | 1.16 (0.92 to 1.45)           |
|                                                    | ≥4         | <b>3.06 (2.37 to 3.95)***</b> | <b>5.02 (2.48 to 10.14)***</b> | <b>1.99 (1.45 to 2.73)***</b> | <b>2.76 (1.24 to 6.13)*</b>   |
| <b>General practitioner</b>                        | None (ref) |                               |                                |                               |                               |
|                                                    | 1-3        | 0.95 (0.84 to 1.07)           | <b>0.73 (0.65 to 0.81)***</b>  | 0.89 (0.77 to 1.03)           | <b>0.69 (0.61 to 0.79)***</b> |
|                                                    | ≥4         | <b>1.26 (1.06 to 1.50)**</b>  | 0.96 (0.79 to 1.18)            | 0.87 (0.69 to 1.10)           | 0.85 (0.66 to 1.09)           |
| <b>Child and adolescent mental health services</b> | None (ref) |                               |                                |                               |                               |
|                                                    | ≥1         | <b>3.18 (2.63 to 3.84)***</b> | <b>3.37 (2.60 to 4.37)***</b>  | <b>2.04 (1.60 to 2.60)***</b> | <b>2.85 (2.07 to 3.93)**</b>  |

Formatted: Position: Horizontal: 0.18", Relative to: Page, Vertical: -0.25", Relative to: Paragraph, Wrap Around

† In the adjusted model use of each health service is adjusted for use of the other health care services, health indicators and sociodemographic variables

†† All associations expressed in odds ratios (OR) with 95% confidence intervals (CI).

\*\*\* significant relationship,  $p \leq 0.001$

\*\* significant relationship,  $p \leq 0.01$

\* significant relationship,  $p \leq 0.05$

1  
2  
3  
4  
5  
6  
7  
8  
9  
10  
11  
12  
13  
14  
15  
16  
17  
18  
19  
20  
21  
22  
23  
24  
25  
26  
27  
28  
29  
30  
31  
32  
33  
34  
35  
36  
37  
38  
39  
40  
41  
42  
43  
44  
45  
46  
47  
48  
49  
50  
51  
52  
53  
54  
55  
56  
57  
58  
59  
60

For peer review only

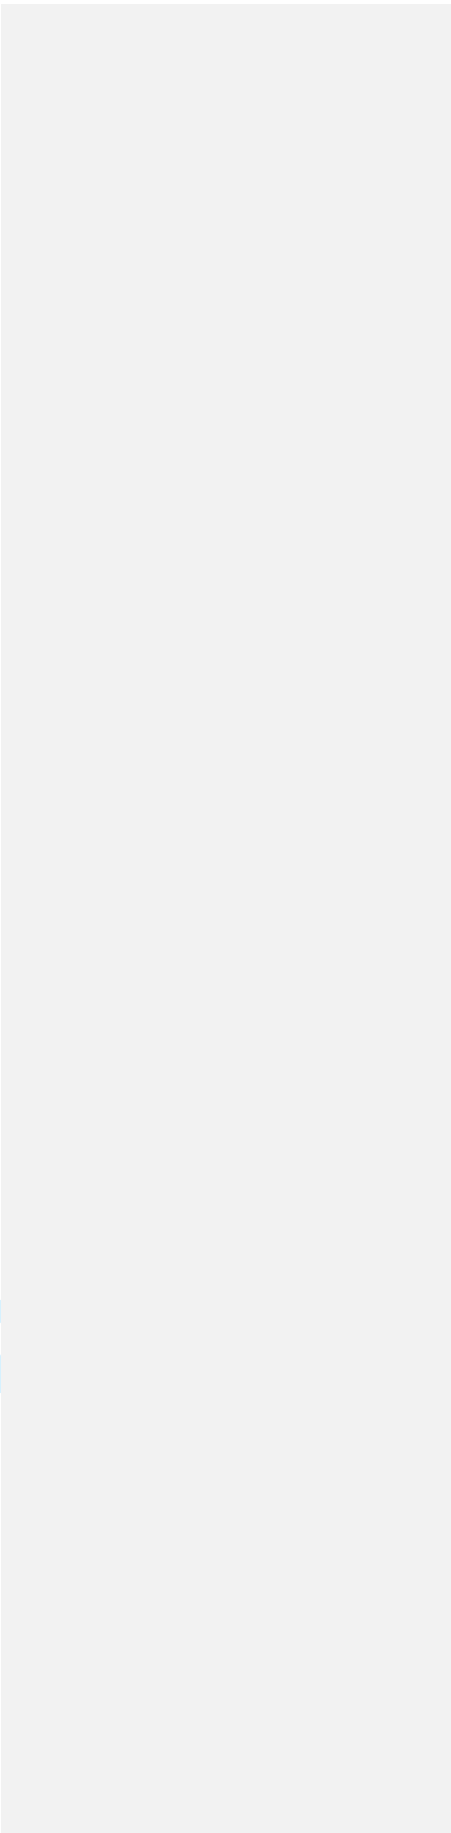

STROBE Statement—Checklist of items that should be included in reports of *cohort studies*

|                              | Item No | Recommendation                                                                                                                                                                                                                                                                                                                                                                                                |
|------------------------------|---------|---------------------------------------------------------------------------------------------------------------------------------------------------------------------------------------------------------------------------------------------------------------------------------------------------------------------------------------------------------------------------------------------------------------|
| <b>Title and abstract</b>    | 1       | (a) Indicate the study's design with a commonly used term in the title or the abstract<br>(b) Provide in the abstract an informative and balanced summary of what was done and what was found                                                                                                                                                                                                                 |
| <b>Introduction</b>          |         |                                                                                                                                                                                                                                                                                                                                                                                                               |
| Background/rationale         | 2       | Explain the scientific background and rationale for the investigation being reported                                                                                                                                                                                                                                                                                                                          |
| Objectives                   | 3       | State specific objectives, including any prespecified hypotheses                                                                                                                                                                                                                                                                                                                                              |
| <b>Methods</b>               |         |                                                                                                                                                                                                                                                                                                                                                                                                               |
| Study design                 | 4       | Present key elements of study design early in the paper                                                                                                                                                                                                                                                                                                                                                       |
| Setting                      | 5       | Describe the setting, locations, and relevant dates, including periods of recruitment, exposure, follow-up, and data collection                                                                                                                                                                                                                                                                               |
| Participants                 | 6       | (a) Give the eligibility criteria, and the sources and methods of selection of participants. Describe methods of follow-up<br>(b) For matched studies, give matching criteria and number of exposed and unexposed                                                                                                                                                                                             |
| Variables                    | 7       | Clearly define all outcomes, exposures, predictors, potential confounders, and effect modifiers. Give diagnostic criteria, if applicable                                                                                                                                                                                                                                                                      |
| Data sources/<br>measurement | 8*      | For each variable of interest, give sources of data and details of methods of assessment (measurement). Describe comparability of assessment methods if there is more than one group                                                                                                                                                                                                                          |
| Bias                         | 9       | Describe any efforts to address potential sources of bias                                                                                                                                                                                                                                                                                                                                                     |
| Study size                   | 10      | Explain how the study size was arrived at                                                                                                                                                                                                                                                                                                                                                                     |
| Quantitative variables       | 11      | Explain how quantitative variables were handled in the analyses. If applicable, describe which groupings were chosen and why                                                                                                                                                                                                                                                                                  |
| Statistical methods          | 12      | (a) Describe all statistical methods, including those used to control for confounding<br>(b) Describe any methods used to examine subgroups and interactions<br>(c) Explain how missing data were addressed<br>(d) If applicable, explain how loss to follow-up was addressed<br>(e) Describe any sensitivity analyses                                                                                        |
| <b>Results</b>               |         |                                                                                                                                                                                                                                                                                                                                                                                                               |
| Participants                 | 13*     | (a) Report numbers of individuals at each stage of study—eg numbers potentially eligible, examined for eligibility, confirmed eligible, included in the study, completing follow-up, and analysed<br>(b) Give reasons for non-participation at each stage<br>(c) Consider use of a flow diagram                                                                                                               |
| Descriptive data             | 14*     | (a) Give characteristics of study participants (eg demographic, clinical, social) and information on exposures and potential confounders<br>(b) Indicate number of participants with missing data for each variable of interest<br>(c) Summarise follow-up time (eg, average and total amount)                                                                                                                |
| Outcome data                 | 15*     | Report numbers of outcome events or summary measures over time                                                                                                                                                                                                                                                                                                                                                |
| Main results                 | 16      | (a) Give unadjusted estimates and, if applicable, confounder-adjusted estimates and their precision (eg, 95% confidence interval). Make clear which confounders were adjusted for and why they were included<br>(b) Report category boundaries when continuous variables were categorized<br>(c) If relevant, consider translating estimates of relative risk into absolute risk for a meaningful time period |

|                          |    |                                                                                                                                                                            |
|--------------------------|----|----------------------------------------------------------------------------------------------------------------------------------------------------------------------------|
| Other analyses           | 17 | Report other analyses done—eg analyses of subgroups and interactions, and sensitivity analyses                                                                             |
| <b>Discussion</b>        |    |                                                                                                                                                                            |
| Key results              | 18 | Summarise key results with reference to study objectives                                                                                                                   |
| Limitations              | 19 | Discuss limitations of the study, taking into account sources of potential bias or imprecision. Discuss both direction and magnitude of any potential bias                 |
| Interpretation           | 20 | Give a cautious overall interpretation of results considering objectives, limitations, multiplicity of analyses, results from similar studies, and other relevant evidence |
| Generalisability         | 21 | Discuss the generalisability (external validity) of the study results                                                                                                      |
| <b>Other information</b> |    |                                                                                                                                                                            |
| Funding                  | 22 | Give the source of funding and the role of the funders for the present study and, if applicable, for the original study on which the present article is based              |

\*Give information separately for exposed and unexposed groups.

**Note:** An Explanation and Elaboration article discusses each checklist item and gives methodological background and published examples of transparent reporting. The STROBE checklist is best used in conjunction with this article (freely available on the Web sites of PLoS Medicine at <http://www.plosmedicine.org/>, Annals of Internal Medicine at <http://www.annals.org/>, and Epidemiology at <http://www.epidem.com/>). Information on the STROBE Initiative is available at <http://www.strobe-statement.org>.

1  
2  
3  
4  
5  
6  
7  
8  
9  
10  
11  
12  
13  
14  
15  
16  
17  
18  
19  
20  
21  
22  
23  
24  
25  
26  
27  
28  
29  
30  
31  
32  
33  
34  
35  
36  
37  
38  
39  
40  
41  
42  
43  
44  
45  
46  
47  
48  
49  
50  
51  
52  
53  
54  
55  
56  
57  
58  
59  
60

**Can use of health care services among 15–16-year-olds predict an increased level of high school dropout? A longitudinal community study.**

Lisbeth Homlong, Elin O. Rosvold, Ole R. Haavet

Department of General Practice, Institute of Health and Society, P.O. Box 1130, Blindern,  
N-0318 Oslo, University of Oslo, Norway,

Lisbeth Homlong, PhD candidate;

Elin O. Rosvold, professor;

Ole R. Haavet, associate professor.

Corresponding author:

Lisbeth Homlong

Mail: [lisbeth.homlong@medisin.uio.no](mailto:lisbeth.homlong@medisin.uio.no)

Field Code Changed

**Word count:** 3872

**Key words:** Health care seeking behavior; adolescent; student dropouts; primary health care; general practitioner.

## Article summary

**Can use of health care services among 15–16-year-olds predict an increased level of high school dropout? A longitudinal community study.**

### Article focus

\* To determine if health care seeking among 15–16-year-olds is associated with high school dropout five years later.

\* To investigate the relationship between health care seeking behaviour and health among 15–16-year-olds and level of high school dropout five years later.

### Key messages

\* Adolescents who make contacts with the child and adolescent mental health services at age 15–16, are more likely than their peers to drop out of high school.

\* Adolescents who attend youth health clinics have higher odds of becoming and school health services could be at risk of high school dropouts.

\* Boys who visit a GP and girls who attend the school health services regularly are less likely to become high school dropouts.

### Strengths and limitations

The results of this study are based on a large community study with a substantial number of participants, yielding a high response rate and few missing data. The prospective–longitudinal design provides a higher power than does a cross-sectional design, because we were able to observe a temporal order of events on an individual level. The baseline survey was conducted in six Norwegian counties in both urban and rural areas and encompasses the entire youth population in these regions. Thus, the adolescent study sample should be representative for a general youth population. Furthermore, the compulsory Norwegian registries linked to the baseline data provided us with complete, reliable follow-up material. The items addressed in the baseline questionnaire have some limitations, however. The help-seeking variables did not provide us with reasons for the adolescents' encounters with the health system. The questions concerning health lack information on the severity or chronicity of conditions. Self-reports can also engender an understimation of health service use and incomplete information on health – especially mental health problems and the use of mental health services.



**ABSTRACT**

**Objectives:** To study associations between health care seeking in 15–16-year-olds and high school dropout five years later.

**Design:** Longitudinal community study.

**Setting:** Data from a comprehensive youth health survey conducted in 2000–2004, linked to data from national registries up to 2010.

**Participants:** 13 964 10th grade secondary school students in six Norwegian counties.

**Main outcome measure:** Logistic regression was used to compute odds ratios for high school dropout.

**Results:** The total proportion of students not completing high school five years after registering was 29% (girls 24%, boys 34%). Frequent attenders to school health services and youth health clinics at age 15–16 had a higher dropout rate (37/48% and 45/71%), compared with those with no (22/33% and 21/33%) or moderate use (25/40% and 32/45%). Adolescents referred to child and adolescent mental health services were also more likely to drop out (47/62%). Boys with moderate use of a general practitioner (GP) had a lower dropout rate (30%).

A multiple logistic regression analysis, in which we adjusted for selected health indicators and sociodemographic background variables, revealed that seeking help from the youth health clinic and consulting child and adolescent mental health services, were associated with increased odds-level of high school dropout five years later. Frequent attenders ( $\geq 4$  contacts) had the highest odds of dropping out. Yet boys who saw a GP and girls attending the school

1  
2  
3  
4  
5  
6  
7 | health services 1–3 times over the previous year were less likely than their peers to drop out  
8 from high school.  
9

10  
11 **Conclusions:** Adolescents who seek help at certain health care services can be at risk of  
12 dropping out of high school later. Health workers should pay particular attention to frequent  
13 attenders and offer follow-up when needed. On the other hand, boys who attended a GP  
14 regularly were more likely to continue to high school graduation, which may indicate a  
15 protective effect of having a regular and stable relationship with a GP.  
16  
17  
18  
19  
20  
21  
22  
23  
24  
25  
26  
27  
28  
29  
30  
31  
32  
33  
34  
35  
36  
37  
38  
39  
40  
41  
42  
43  
44  
45  
46  
47  
48  
49  
50  
51  
52  
53  
54  
55  
56  
57  
58  
59  
60

## INTRODUCTION

Adolescents reporting poor health tend to have an underconsumption of health care facilities according to their expected need, ~~hence and due to this~~ a considerable proportion of them seem to have health problems not met by health care professionals. [1-3] Other studies have suggested that only a minority of adolescents with mental health problems seek health care for these reasons. [4, 5] Nevertheless, help seekers should be considered a vulnerable group. A US study has shown that disturbed adolescents more frequently seek help from professional health care services than do their non-disturbed peers. [6] Furthermore, adolescent frequent attenders to primary health care report more physical health complaints, more emotional problems and more days off school than do regular primary health care attenders. [7]

Poor mental and physical health are among several factors which can have an influence on help seeking behaviour and at adolescents' ability to graduate from high school. [8, 9]

Although chronic disease in childhood has an impact on educational level and work participation in adult life, [10, 11] less is known about the effects of ill health during adolescent years. [9] An increasing load of mental health problems in young people, including depressive symptomatology, can play a role [12, 13] and several studies have shown ~~an~~ associations with failure to complete high school. [14, 15] In a recent Norwegian study, one out of five high school dropouts reported that they quit because of mental health problems.

[16] Previous research indicates that teenage pregnancy and substance abuse are also associated with dropping out. [17, 18]

A substantial number of adolescents drop out of high school, placing themselves at higher risk of marginalisation later in life [8, 19] and generating considerable public attention in recent years. Norway and several other western countries experience the same challenges. In Norway, adolescents normally enrol in high school at age 15–16, immediately after finishing

1  
2  
3  
4  
5  
6  
7 10th grade, which is the last year of compulsory school. Students are supposed to complete  
8  
9 high school within three years. Those who fail to graduate within five years after registering  
10  
11 as students are defined as high school dropouts. A recent Norwegian study has shown that  
12  
13 high school dropouts are at higher risk than their peers of receiving social security benefits  
14  
15 five years later. [20] Previous studies have found a strong association between low  
16  
17 educational level and early receipt of a disability pension. [11, 21] Education is a key to  
18  
19 participation in adult work life, and high school graduation has a strong influence on future  
20  
21 health and well-being. [8, 22]

22  
23 The concept of marginalisation is often used to describe a process that in a worst case  
24  
25 scenario can end up in permanent exclusion.[23] Dropping out of high school can be a first  
26  
27 step in the process of marginalisation. High school dropout and marginalisation among young  
28  
29 adults are fields that must be approached from different angles. Both individual characteristics  
30  
31 and contextual factors related to family, friends, the community, the schools and the school  
32  
33 system have an influence on dropout.

34  
35 In our study we addressed the problem from a health-related perspective, by exploring if  
36  
37 adolescents at risk had made contacts with the health services already at age 15–16. Help  
38  
39 seeking behaviour cannot be explored without including health and sociodemographic  
40  
41 background factors. As we consider help seekers a vulnerable group, the aim of our study was  
42  
43 to determine if adolescent help seekers also have increased odds of high school dropout in a  
44  
45 longitudinal perspective. ~~We wanted to investigate this by exploring relationships between~~  
46  
47 ~~health-care-seeking behaviour and health in 15–16-year-olds and level of high school dropout~~  
48  
49 ~~five years later.~~

## METHODS

### Population

A large comprehensive health survey of all 10th grade secondary school students (aged 15–16) in six Norwegian counties, was conducted between 2000 and 2004. The youth survey was initiated in Oslo in 2000 and was extended to include five more counties in the following years 2001–2004. Originally 18 425 10th graders were invited to the baseline studies, while the overall response rate was 87% (n=15 966). The study was organised as a classroom survey, where the pupils filled out a written questionnaire during 2 school hours. An assistant was present to provide information to the participants and administer the questionnaires. Pupils not present at school at the day of the survey were left questionnaires at the schools to be filled out later. Those not responding, received a copy by mail to their home address along with a stamped return envelope.

Participation in the survey was voluntary and the pupils signed an informed consent in advance. The survey comprised questions about relationships with family, friends and school; physical and mental health; health behaviour; and life events. [24] More detailed information about the health survey is available on the website of the Norwegian Institute of Public Health. [25]

Questionnaire data from the study were linked to data from the National Education Registry and the National Insurance Services (NIS/FD-trygd), compulsory national databases which supply detailed information on the entire cohort up to the year 2010. A precise linkage of records was possible because of the national identification number given to every resident of Norway. After linkage by Statistics Norway, the national identification numbers were removed from the data sets and kept within a safe computer system to secure anonymity for each individual. At baseline, the adolescent contributors to the questionnaires were asked for

1  
2  
3  
4  
5  
6  
7 their consent to link the data from the questionnaires to national registers at a later date; 90%  
8 of the 15 966 in our baseline population agreed (n=14 062).  
9

10  
11 From the National Insurance Services we obtained information on participants who were  
12 granted an early permanent disability benefit (n=55) during the follow-up period. We  
13 excluded those individuals from the study, as a majority were diagnosed with mild to  
14 moderate mental retardation, diagnoses within the autistic spectrum; or severe psychiatric  
15 disorders like schizophrenia – conditions which were not compatible with high-school  
16 graduation.  
17  
18  
19  
20  
21  
22

23  
24 Participants who died (n=43) during follow-up time were also excluded from the analyses,  
25 leaving us with a total study group of n=13 964.  
26  
27

## 28 **Ethics**

29  
30  
31 The study was approved by the Regional Committee for Medical and Health Research Ethics  
32 and by the Norwegian Data Inspectorate. These institutions gave permission for the use and  
33 linkage of the data. The adolescent participants gave a written consent to link their  
34 questionnaire data to national registers at a later date.  
35  
36  
37  
38

39 Table 1 about here

## 40 **Variables**

### 41 High-school dropouts

42  
43  
44 From the National Education registry, we gained information on adolescents who had failed  
45 to complete high school, which is the main outcome variable in this paper. In Norway,  
46 adolescents normally enroll in high-school at age 15–16, immediately after finishing 10th  
47 grade, which is the last year of ~~obligatory-compulsory~~ schooling in Norway. Students are  
48  
49  
50  
51  
52  
53  
54

1  
2  
3  
4  
5  
6  
7 supposed to complete high school within three years. Those who did not graduate within five  
8 years after registering as high-school students were defined for the purposes of this study as  
9 high-school-dropouts. [26]  
10  
11

#### 12 Use of health-care services

13  
14  
15  
16  
17 In the baseline questionnaires, participants answered questions about help seeking from the  
18 health-care system over the 12 months prior to the survey, whether through school health  
19 services, youth health clinic, general practitioner (GP), or child and adolescent mental health  
20 services. The GP, the school health services and the youth health clinic in Norway are  
21 considered low-threshold parts of the primary health-care system, and are all free of charge  
22 for children and adolescents up to the age of 16. The services of child and adolescent mental  
23 health are paid for by the government, but a referral is required from a GP or another  
24 physician. To measure the use of health-care services, the contributors were given three  
25 response options – “none”, “1–3” or “4 or more” – for number of contacts during the past  
26 year. In our analyses, we aggregated contacts with the child and adolescent mental health  
27 services into two categories: “none” or “1 or more” contacts. The *reason* for visiting any of  
28 the service providers was not measured in the questionnaires.  
29  
30  
31  
32  
33  
34  
35  
36  
37  
38  
39

#### 40 Health indicators

41  
42  
43 At baseline, adolescents were asked questions concerning their health, including direct  
44 questions on specific conditions. As adjustment variables we used the baseline questions  
45 addressing the adolescents’ self-perceptions of the status of their general health, if they had or  
46 have had asthma or allergies, and conditions experienced in the 12 months prior to the survey:  
47 serious illness or injury; headache, abdominal pain, neck pain or shoulder pain, back pain or  
48 pain in extremities. The contributors could answer ‘yes’ or ‘no’ to these health and pain  
49  
50  
51  
52  
53  
54

1  
2  
3  
4  
5  
6  
7 questions. Self-rated health is a health measure which can predict later morbidity, mortality,  
8 health service use and early disability. [27] During adolescence, self-rated health status  
9 appears to be relatively stable, and it seems not to be changed by medical diagnoses or by  
10 mental or somatic health symptoms. [27] Self-rated health is considered to have good  
11 reliability for adults. [28] In the baseline questionnaire, self-rated health was categorised into  
12 four options: 'bad', 'not good', 'good' or 'very good'. In our analyses, we dichotomised this  
13 variable into two categories: 'very good or good' and 'not good or bad'. We also aggregated  
14 the pain variables into a dichotomous variable, in which three or more pain sites indicated a  
15 positive pain score and two or fewer indicated a negative pain score. We consider widespread  
16 pain to be an independent indicator of ill health. We also know from previous research that  
17 there is a certain comorbidity in adults between depressive disorders and chronic pain. [29]  
18 Level of mental health problems were scored using the Hopkin's Symptom Checklist-10  
19 (HSCL-10), a short-form of the Hopkin's Symptom Checklist-25 (SCL-25), and an  
20 instrument designed to diagnose depression in primary health care. [30] The HSCL-10  
21 includes ten questions about psychological symptoms experienced over the previous week and  
22 is validated for use both in general practice and in epidemiological studies. [31] A sum score  
23 above 1.6 indicates mild, moderate or severe depression among 14–16-year-olds.

#### 24 Sociodemographics

25  
26 The sociodemographic background variables concerning parents' marital situation and  
27 household income were based on self-reports from the baseline questionnaires. The pupils  
28 were asked whether their parents' were 'married/living together'; 'divorced/separated'; 'one  
29 or both dead'; or 'other'. We chose to dichotomise these options into 'married/living together'  
30 or 'other'. The question concerning household income were categorised into 'very good';  
31 'good'; 'mediocre'; or 'poor'. Here we chose to collapse 'very good' and 'good' into one



1  
2  
3  
4  
5  
6  
7  
8  
9  
10  
11  
12  
13  
14  
15  
16  
17  
18  
19  
20  
21  
22  
23  
24  
25  
26  
27  
28  
29  
30  
31  
32  
33  
34  
35  
36  
37  
38  
39  
40  
41  
42  
43  
44  
45  
46  
47  
48  
49  
50  
51  
52  
53  
54  
55  
56  
57  
58  
59  
60

category, which we used as the reference category. Information on parents' educational level were provided by Statistics Norway. The highest accomplished educational level of one of the parents were used, leaving us with four categories: 'higher college or university degree' (>4 years); 'lower college or university degree'; 'high school'; or 'primary school'.

For peer review only

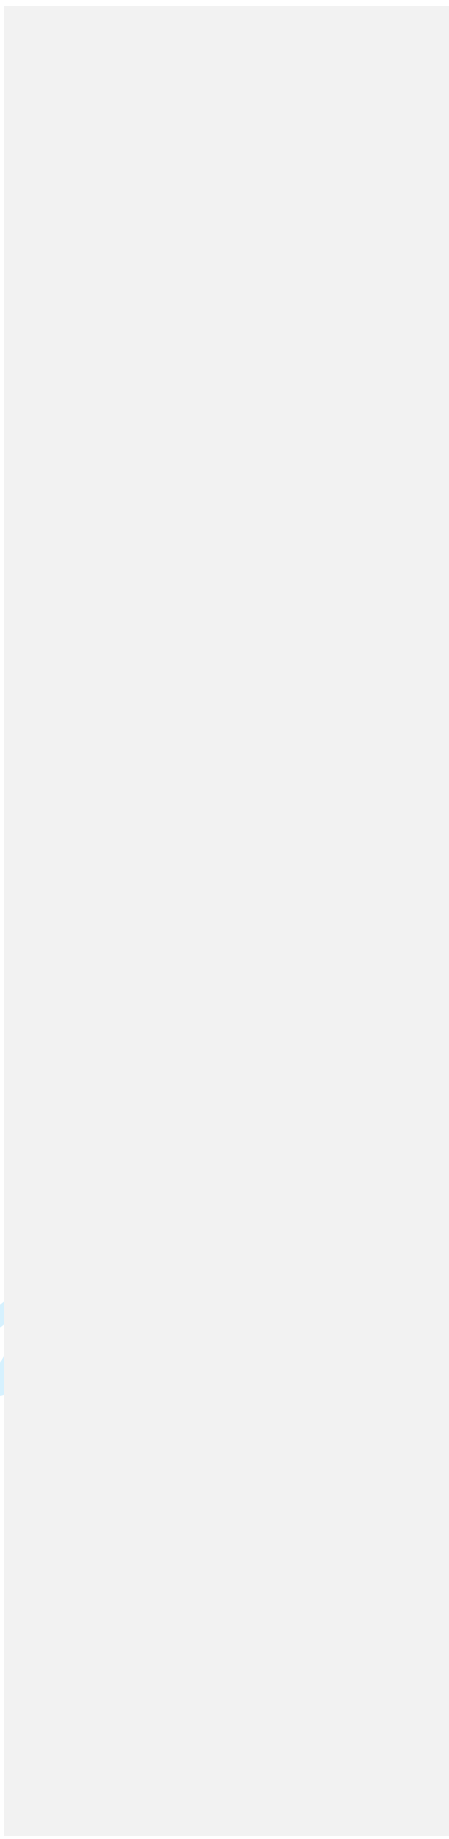

### Statistical analyses

Analyses of the data set were performed using multiple logistic regression analysis in SPSS version 19.0, with high-school dropout as the outcome variable. In the crude model, we tested the variables concerning health service usage separately and odds ratios were computed for high-school dropout. In the adjusted model, use of health-care services were adjusted for each other, for the selected health indicators and for sociodemographic background variables. All analyses were stratified by gender.

## RESULTS

Girls comprised 50.3% of our study group. Descriptive data of the population is presented in Table 1. Missing data caused by skipped questions concerning health-care seeking varied from 0.8% to 1.6%, while the questions on health had missing values from 1.1% to 6.5%. Follow-up data indicated that 28.9% of the students did not complete high school within five years (girls 23.8%, boys 34.2%). The descriptive baseline material revealed that 70% of the adolescents attended one or more health-care services over the previous year: school health services (girls 32.4%, boys 16.4%), youth health clinic (girls 21.1, boys 7.8%), GP (girls 59.5, boys 46.5%), child and adolescent mental health services (girls 6.9, boys 3.7%). Girls had substantially more contacts than did boys. A smaller number of the adolescents reported four or more contacts with school health services (girls 4.7, boys 0.9%) and the youth health clinic (girls 3.7, boys 0.6%), whereas 12.1% of the girls and 6.6% of the boys reported multiple contacts with a GP.

With few exceptions, adolescents who reported use of different health-care services during the past 12 months, generally reported more health problems, compared to those who reported no use of such health services (Table 2). Among frequent attenders ( $\geq 4$  visits), a substantially higher percentage reported health problems compared to those with moderate use of services. This was the case for both girls and boys.

Table 2 about here

As shown in Table 3, a higher rate of high school dropouts were observed among frequent attenders to the school health services (girls 36.5%, boys 48.3%) and the youth health clinic (girls 44.5, boys 71.1%), compared to those with no or moderate use (1–3 visits). Also adolescents referred to the mental health service had a higher dropout rate (girls 47.0, boys 62.2%). Boys with moderate use of a GP, had a lower dropout rate (29.8%).

1  
2  
3  
4  
5  
6  
7 Table 3 about here  
8

9 Table 4 shows that visiting the child and adolescent mental health services at age 15–16 was  
10 strongly associated with dropping out of high school five years later, in both genders (girls'  
11 odds ratio 3.18, 95% confidence interval 2.63 to 3.84; boys 3.37, 2.60 to 4.37). Likewise,  
12 seeking help at the youth health clinic (1–3 contacts: girls 1.83, 1.60 to 2.10; boys 1.64, 1.36  
13 to 1.97. ≥4 contacts: girls 3.06, 2.37 to 3.95; boys 5.02, 2.48 to 10.14). The associations  
14 remained significant after adjustment for use of other health care services, health indicators  
15 and sociodemographic variables – except for boys with moderate use of the youth health  
16 clinic. In the unadjusted analyses, attending the school health services was associated with  
17 dropping out of high school (1–3: girls 1.15, 1.01 to 1.30; boys 1.36, 1.19 to 1.56. ≥4: girls  
18 2.02, 1.59 to 2.56; boys 1.93, 1.16 to 3.21), while after adjustments in girls, moderate use of  
19 school health services had a slightly protective effect (0.82, 0.70 to 0.96).  
20  
21  
22  
23  
24  
25  
26  
27  
28  
29  
30

31 Between 1 and 3 contacts with the GP the previous year was associated with a lower level of  
32 high-school dropout in boys (0.73, 0.65 to 0.81). Boys who were regular users of a GP also  
33 had a significant lower dropout rate in the adjusted model.  
34  
35  
36

37  
38 Table 4 about here  
39  
40  
41  
42  
43  
44  
45  
46  
47  
48  
49  
50  
51  
52  
53  
54  
55  
56  
57  
58  
59  
60

1  
2  
3  
4  
5  
6  
7  
8  
9  
10  
11  
12  
13  
14  
15  
16  
17  
18  
19  
20  
21  
22  
23  
24  
25  
26  
27  
28  
29  
30  
31  
32  
33  
34  
35  
36  
37  
38  
39  
40  
41  
42  
43  
44  
45  
46  
47  
48  
49  
50  
51  
52  
53  
54  
55  
56  
57  
58  
59  
60

## DISCUSSION

### Main findings

Results revealed that 15–16-year-olds who attended the youth health clinic and those who saw the child and adolescent mental health services were significantly more likely to drop out of high school five years later than were those who did not seek help at these services. We also found that use of school health services was related to high school dropout, in both genders, but not after adjustments had been made. On the contrary, girls who reported 1-3 contacts with the school-based clinic the past year, had a slightly better outcome. Also boys who attended a GP regularly were more likely to continue to high-school graduation, which may indicate a protective effect of having a regular and stable relationship with a GP.

### Strengths and weaknesses

The substantial number of participants in geographical diverse areas, along with a high response rate and few missing data constitute strengths of this prospective community study. The adolescent study sample should be representative, therefore, for a general youth population. Furthermore, the compulsory Norwegian registries provided us with complete, reliable follow-up material. The prospective-longitudinal design provided the opportunity to observe a temporal order of events on an individual level, and it can be argued that the power is stronger compared to that of a cross-sectional design. One should be careful, however, not to draw conclusions about causal relationships, given the observational nature of the study.

The baseline survey was conducted in six Norwegian counties in both urban and rural areas and encompasses the entire youth population in these regions. Yet, because local variations in the accessibility of health-care services can influence help-seeking behaviour, our results may not be applicable in all settings.

1  
2  
3  
4  
5  
6  
7 One limitation of the questions concerning health – variables which were adjusted for in the  
8 analyses – is the lack of information they provide on the severity or chronicity of conditions.  
9  
10 Furthermore, the help-seeking variables in the baseline survey provide no reasons for the  
11 adolescents' encounters with the health system. Self-reports can imply an underestimation of  
12 health service usage, especially use of mental health services. Other health problems than  
13 those adjusted for in our analyses could have influenced help-seeking behaviour and failure to  
14 complete high school. Yet disability benefits acquired at a young age were considered to have  
15 been the result of the most serious health disabilities, and were therefore excluded from our  
16 sample.  
17  
18  
19  
20  
21  
22  
23

24  
25 A recent validation study confirms that the HSCL-10 instrument, which we have used to  
26 measure mental health problems, is a suitable diagnostic tool for adolescents in this age  
27 group, and is also found to be appropriate for use in epidemiological studies. [31] Although  
28 our cutoff point of 1.6 has been validated as optimal for detecting mild, moderate and severe  
29 depression in 14–16-year-olds of both genders, [31] it can be argued that this cutoff may be  
30 low, and could thereby define an unreasonably large proportion of adolescents as depressed.  
31 [32, 33] Another constraint is lack of a measure of other types of mental health problems.  
32  
33  
34  
35  
36  
37  
38

39 High-school dropout has been chosen as the outcome variable because it is an early marker  
40 for later work marginalisation and social exclusion. [11, 20, 21] Previous studies indicate that  
41 those who drop out of high school have a higher risk of becoming dependent on welfare  
42 benefits in adult life, including receipt of an early disability pension. [11, 34, 35] It can be  
43 argued that the five-year limit is strict, but it is consistent with other studies on school  
44 dropout, and few of those who fail to complete high school within five years succeed in  
45 finishing later. [26] [19]  
46  
47  
48  
49  
50  
51  
52  
53  
54  
55  
56  
57  
58  
59  
60

### Comparison with previous research

We do not imply that health service use in adolescence causes high-school dropout, rather that it is a proxy for problems which can be independent risk factors for dropout. Even though several studies confirm an under-use of health care among adolescents who struggle with somatic and mental health issues, [1, 36] both previous research [7] and the descriptive material in our study, as shown in Table 2, confirm that help seekers constitute a group which generally have a greater load of health problems compared to non-seekers, and should receive special attention. Both structural and individual factors influence help seeking. [36, 37] From previous research we know that such sociodemographic characteristics as economic status and parents' educational level influence both help seeking [2, 7] and high school graduation. [8, 19] Health complaints which commonly lead adolescents to seek help can also influence them to drop out. After correcting for such factors in our analyses, we found a negative outcome in adolescents seeking help at the youth health clinic and the mental health services, indicating that they have other challenges that can explain their higher probability of dropping out. On the other hand, help seekers may have resources and certain personal qualities that enable them to recognise and cope with their problems – a characteristic for which we cannot correct in the analyses. [3]

Youth health clinics in Norway provide free advice and prescriptions for birth control and treatment of sexually transmitted diseases. In addition, it is a low-threshold service centre where adolescents can consult a nurse or a physician about mental health issues. Visiting the youth health clinic multiple times at 15–16 years of age can indicate sexual debut at an early age. We know that adolescent pregnancy is a risk factor for lower educational achievement, [18] but less is known about early sexual activity in general and failure to complete high school. A previous study has shown associations between low academic achievement and

1  
2  
3  
4  
5  
6  
7 high level of externalising behaviour and early sexual debut in both genders. [38] A US study  
8 on adolescents receiving mental health treatment shows associations between both  
9 externalising and internalising psychiatric disorders and sexual risk-taking behaviour. [39] To  
10 the best of our knowledge, there is limited research on boys who attend the youth health clinic  
11 or similar services, and there are few boys in our sample with multiple encounters. Those who  
12 have multiple encounters, however, have a dropout rate above 70%. Our results indicate that  
13 health workers in youth health clinics should be aware of and offer follow-up to adolescents  
14 with multiple visits.  
15  
16  
17  
18  
19  
20  
21  
22

23 In the crude model, adolescent attenders to the school health services generally had a higher  
24 level of high school dropout. After adjustments, though, girls with moderate attendance turned  
25 out to have slightly lower odds for dropout. A recent US study has found an association  
26 between low to moderate use of school-based health centres and reduction of dropout for high  
27 school students, [40] a finding which is in line with our result. The American school-based  
28 health centres, however, offer a wider range of health services than do school health services  
29 in Norway, and are therefore not directly comparable.  
30  
31  
32  
33  
34  
35  
36

37 We found that consulting the child and adolescent mental health services was associated with  
38 lower odds for graduating from high school. Because a referral is needed in order to see the  
39 mental health services, we argue that individuals who qualify for specialised therapy usually  
40 have relatively severe mental health problems. A previous study has shown that there is a  
41 dose-response association between help-seeking for mental health problems and symptom  
42 load of anxiety and depression. [41] Furthermore, early-onset mental disorders have been  
43 shown to be associated with lower educational attainment. [12, 13] It is not surprising, then,  
44 that the outcome in the group consulting mental health services at age 15–16 is less fortunate.  
45  
46  
47  
48  
49  
50  
51  
52  
53  
54  
55  
56  
57  
58  
59  
60



1  
2  
3  
4  
5  
6  
7  
8  
9  
10  
11  
12  
13  
14  
15  
16  
17  
18  
19  
20  
21  
22  
23  
24  
25  
26  
27  
28  
29  
30  
31  
32  
33  
34  
35  
36  
37  
38  
39  
40  
41  
42  
43  
44  
45  
46  
47  
48  
49  
50  
51  
52  
53  
54  
55  
56  
57  
58  
59  
60

Boys who saw a GP regularly were more likely to graduate from high school than their peers, although there was no such statistically significant relationship for girls. This finding suggests that, for boys, having a stable relationship with a GP in their adolescent years can have a positive impact. Yet whereas we assume that the boys who use GP services are consulting for health problems and that they are helped in some way, they may also have individual resources which explain their better outcomes. Teenage boys have a substantially lower use of health-care services than girls do, including seeing a GP. [42] They are also more reluctant to seek help for emotional problems unless severely distressed. [37, 43]

### Implications for policy and practice

Previous research confirms that adolescents have frequent encounters with the primary health-care services every year, [4, 44, 45] which is consistent with our findings. These contacts provide golden opportunities to uncover somatic health problems and mental distress. Health workers in the primary health-care services should pay particular attention to adolescents with multiple health service encounters and offer follow-up when needed. It is also important to refer to the specialist services when the severity of the condition calls for it. Our results ~~clearly show~~ may suggest that by the time adolescents are referred to second-line mental health services, their conditions are well entrenched and the prognosis is consequently more negative.

Youth health clinics are low-threshold services which are visited by a substantial number of adolescents every year – especially young girls. Considering the high probability of dropping out among attenders of this service, as shown in our study, health workers should be advised to focus particularly on these adolescents and the ~~content~~ quality of their treatment.

1  
2  
3  
4  
5  
6  
7  
8  
9  
10  
11  
12  
13  
14  
15  
16  
17  
18  
19  
20  
21  
22  
23  
24  
25  
26  
27  
28  
29  
30  
31  
32  
33  
34  
35  
36  
37  
38  
39  
40  
41  
42  
43  
44  
45  
46  
47  
48  
49  
50  
51  
52  
53  
54  
55  
56  
57  
58  
59  
60

Whereas girls report more health problems and a higher level of health service usage than boys do, they are more likely to graduate from high school – a ~~divergence~~<sup>dilatation</sup> that calls for a broader approach to the relationship between health and failure to complete high school. More research is needed to disentangle the role of health services in dealing with adolescent health and possible preventive potential for adolescents' symptom load and functional impairment in the following years.

## Acknowledgements

The data collection was carried out and funded by the Norwegian Institute of Public Health in collaboration with the University of Oslo.

We also acknowledge statistician Tore Wentzel-Larsen at the Norwegian Centre for Violence and Traumatic Stress Studies/Centre for Child and Adolescent Mental Health, Eastern and Southern Norway, Oslo, Norway for helping out with preparing the data for analyses.

**Contributors:** All three authors contributed to the study design, discussions of the results and writing of the final paper. LH prepared the data, undertook the primary analyses and the first interpretations and wrote the first draft of the paper. ORH and EOR supervised the analyses and critically reviewed the paper. ORH and EOR also took part in planning and conducting the original baseline survey. All authors approved the submitted version.

**Funding:** The study was funded by the Norwegian Research Council.

**Competing interests:** All authors have completed the Unified Competing Interest form at [www.icmje.org/coi\\_disclosure.pdf](http://www.icmje.org/coi_disclosure.pdf) (available on request from the corresponding author) and declare no competing interests.

**Ethical approval:** The study was approved by the Norwegian Institute of Public Health, Statistics Norway, the Ministry of Education and Research and the Medical Ethics Committee. These institutions gave permission for the use and linkage of the data. The adolescent participants gave written consent to link their questionnaire data to national registers at a later date.

**Data sharing:** no additional data available.

**Copyright:** The Corresponding Author has the right to grant on behalf of all authors and does grant on behalf of all authors, a worldwide licence to the Publishers and its licensees in perpetuity, in all forms, formats and media (whether known now or created in the future), to i) publish, reproduce, distribute, display and store the Contribution, ii) translate the Contribution into other languages, create adaptations, reprints, include within collections and create summaries, extracts and/or, abstracts of the Contribution, iii) create any other derivative work(s) based on the Contribution, iv) to exploit all subsidiary rights in the Contribution, v) the inclusion of electronic links from the Contribution to third party material where-ever it may be located; and, vi) licence any third party to do any or all of the above.

**WHAT IS ALREADY KNOWN ON THIS TOPIC**

High school dropouts are at risk of later marginalisation.

Poor physical and mental health is related to dropping out from high school.

Adolescents who use health care services constitute a vulnerable group.

**WHAT THIS STUDY ADDS**

Adolescents who see the child and adolescent mental health services at age 15, are more likely to drop out from high school, compared to their peers.

Adolescents who attend youth health clinics could be at risk of high school dropout.

Boys who attend a GP and girls who visit the school health clinic regularly are less likely to become high school dropouts.

1  
2  
3  
4  
5  
6  
7  
8  
9  
10  
11  
12  
13  
14  
15  
16  
17  
18  
19  
20  
21  
22  
23  
24  
25  
26  
27  
28  
29  
30  
31  
32  
33  
34  
35  
36  
37  
38  
39  
40  
41  
42  
43  
44  
45  
46  
47  
48  
49  
50  
51  
52  
53  
54  
55  
56  
57  
58  
59  
60

## References

1. Britto MT, Klostermann BK, Bonny AE, et al. Impact of a school-based intervention on access to healthcare for underserved youth. *The Journal of adolescent health : official publication of the Society for Adolescent Medicine* 2001;**29**(2):116-24.
2. Eisenberg D, Golberstein E, Gollust SE. Help-seeking and access to mental health care in a university student population. *Medical care* 2007;**45**(7):594-601 doi: 10.1097/MLR.0b013e31803bb4c1[published Online First: 27 Jul 2001].
3. Zwaanswijk M, Verhaak PF, Bensing JM, et al. Help seeking for emotional and behavioural problems in children and adolescents: a review of recent literature. *European child & adolescent psychiatry* 2003;**12**(4):153-61 doi: 10.1007/s00787-003-0322-6[published Online First: 16 Jun 2007].
4. Mauerhofer A, Berchtold A, Michaud PA, et al. GPs' role in the detection of psychological problems of young people: a population-based study. *The British journal of general practice : the journal of the Royal College of General Practitioners* 2009;**59**(566):e308-14 doi: 10.3399/bjgp09X454115[published Online First: 19 Sept 2009].
5. Flament MF, Cohen D, Choquet M, et al. Phenomenology, psychosocial correlates, and treatment seeking in major depression and dysthymia of adolescence. *Journal of the American Academy of Child and Adolescent Psychiatry* 2001;**40**(9):1070-8 doi: 10.1097/00004583-200109000-00016[published Online First: 15 Sept 2001].
6. Offer D, Howard KI, Schonert KA, et al. To whom do adolescents turn for help? Differences between disturbed and nondisturbed adolescents. *Journal of the American Academy of Child and Adolescent Psychiatry* 1991;**30**(4):623-30 doi: 10.1097/00004583-199107000-00015[published Online First: 1 Jul 1991].
7. Vila M, Kramer T, Obiols JE, et al. Adolescents who are frequent attenders to primary care: contribution of psychosocial factors. *Social psychiatry and psychiatric epidemiology* 2010 doi: 10.1007/s00127-010-0326-8[published Online First: 21 Dec 2010].
8. Freudenberg N, Ruglis J. Reframing school dropout as a public health issue. *Preventing chronic disease* 2007;**4**(4).
9. Suhrcke M, de Paz Nieves, C. The impact of health and health behaviours on educational outcomes in high-income countries: a review of the evidence: Copenhagen, WHO Regional Office for Europe, 2011.
10. Maslow GR, Haydon AA, Ford CA, et al. Young adult outcomes of children growing up with chronic illness: an analysis of the National Longitudinal Study of Adolescent Health. *Archives of pediatrics & adolescent medicine* 2011;**165**(3):256-61 ].
11. Gravseth HM, Bjerkedal T, Irgens LM, et al. Life course determinants for early disability pension: a follow-up of Norwegian men and women born 1967-1976. *European journal of epidemiology* 2007;**22**(8):533-43 doi: 10.1007/s10654-007-9139-9[published Online First: 29 May 2007].
12. Breslau J, Lane M, Sampson N, et al. Mental disorders and subsequent educational attainment in a US national sample. *Journal of psychiatric research* 2008;**42**(9):708-16 doi: 10.1016/j.jpsychires.2008.01.016[published Online First: 12 Mar 2008].
13. Stoep AV, Weiss NS, Kuo ES, et al. What proportion of failure to complete secondary school in the US population is attributable to adolescent psychiatric disorder? *The journal of behavioral health services & research* 2003;**30**(1):19-24.
14. Fletcher JM. Adolescent depression: diagnosis, treatment, and educational attainment. *Health economics* 2008;**17**(11):1215-35 doi: 10.1002/hec.1319[published Online First: 25 Dec 2007].

15. Needham BL. Adolescent depressive symptomatology and young adult educational attainment: an examination of gender differences. *The Journal of adolescent health : official publication of the Society for Adolescent Medicine* 2009;**45**(2):179-86 doi: 10.1016/j.jadohealth.2008.12.015[published Online First: 25 Jul 2009].
16. Markussen E, Seland I. Å redusere bortvalg - bare skolenes ansvar? En undersøkelse av bortvalg ved de videregående skolene i Akershus fylkeskommune skoleåret 2010-2011. NIFU: Nordic Institute for Studies in Innovation, Research and Education, 2012.
17. Townsend L, Flisher AJ, King G. A systematic review of the relationship between high school dropout and substance use. *Clinical child and family psychology review* 2007;**10**(4):295-317.
18. Hofferth SL, Reid L, Mott FL. The effects of early childbearing on schooling over time. *Family planning perspectives* 2001;**33**(6):259-67.
19. Bratsberg B, Raaum O, Røed K, et al. Utdannings- og arbeidskarrierer hos unge voksne: Hvor havner ungdom som slutter skolen i ung alder? Frisch Report 3: Ragnar Frisch Centre for Economic Research, 2010.
20. De Ridder KA, Pape K, Johnsen R, et al. School dropout: a major public health challenge: a 10-year prospective study on medical and non-medical social insurance benefits in young adulthood, the Young-HUNT 1 Study (Norway). *Journal of epidemiology and community health* 2012 doi: 10.1136/jech-2011-200047[published Online First: 9 Febr 2012].
21. Bruusgaard D, Smeby L, Claussen B. Education and disability pension: a stronger association than previously found. *Scandinavian journal of public health* 2010;**38**(7):686-90 doi: 10.1177/1403494810378916[published Online First: 20 Aug 2010].
22. Avendano M, Jurges H, Mackenbach JP. Educational level and changes in health across Europe: longitudinal results from SHARE. *J Eur Soc Policy* 2009;**19**(4):301-16.
23. Geijerstam C. *Tidlig arbeidsledighet og marginalisering*. Contributor, Universitetet i Oslo Økonomisk institutt Ragnar Frisch Centre for Economic Research, 2001.
24. Søgaard A, Eide, T. The Oslo Health Study (HUBRO) – The Youth part (UNGHUBRO). Aims, Materials and Methods (online), 2005. Retrieved from <http://www.fhino/dav/AD07555E4Bdoc> (accessed 24 Jun 2013).
25. [http://www.fhi.no/eway/default.aspx?pid=238&trg=MainArea\\_5811&MainArea\\_5811=5895:0:15,4438:1:0:0:::0:0](http://www.fhi.no/eway/default.aspx?pid=238&trg=MainArea_5811&MainArea_5811=5895:0:15,4438:1:0:0:::0:0) (accessed 9 Apr 2013).
26. Falch T, Nyhus OH. High school dropout and labour market attachments among young adults. Centre for Economic research: NTNU, 2009.
27. Breidablik HJ, Meland E, Lydersen S. Self-rated health during adolescence: stability and predictors of change (Young-HUNT study, Norway). *European journal of public health* 2009;**19**(1):73-8.
28. Lundberg O, Manderbacka K. Assessing reliability of a measure of self-rated health. *Scandinavian journal of social medicine* 1996;**24**(3):218-24.
29. Bair MJ, Robinson RL, Katon W, et al. Depression and pain comorbidity: a literature review. *Archives of internal medicine* 2003;**163**(20):2433-45 ].
30. Strand BH, Dalgard OS, Tambs K, et al. Measuring the mental health status of the Norwegian population: a comparison of the instruments SCL-25, SCL-10, SCL-5 and MHI-5 (SF-36). *Nordic journal of psychiatry* 2003;**57**(2):113-8.
31. Haavet OR, Sirpal MK, Haugen W, et al. Diagnosis of depressed young people in primary health care--a validation of HSCLE-10. *Family practice* 2011;**28**(2):233-7 doi: 10.1093/fampra/cmz078[published Online First: 13 Oct 2010].

- 1  
2  
3  
4  
5  
6  
7 32. Angold A, Costello EJ, Farmer EM, et al. Impaired but undiagnosed. *Journal of the American Academy of Child and Adolescent Psychiatry* 1999;**38**(2):129-37 doi: 10.1097/00004583-199902000-00011[published Online First: 10 Febr 1999].
- 8  
9  
10 33. Fergusson DM, Horwood LJ, Ridder EM, et al. Subthreshold depression in adolescence and mental health outcomes in adulthood. *Archives of general psychiatry* 2005;**62**(1):66-72 doi: 10.1001/archpsyc.62.1.66[published Online First: 5 Jan 2005].
- 11  
12 34. Gjesdal S, Ringdal PR, Haug K, et al. Long-term sickness absence and disability pension with psychiatric diagnoses: a population-based cohort study. *Nordic journal of psychiatry* 2008;**62**(4):294-301 doi: 10.1080/08039480801984024[published Online First: 16 Jul 2008].
- 13  
14  
15 35. Wilford J, McMahon AD, Peters J, et al. Predicting job loss in those off sick. *Occupational medicine* 2008;**58**(2):99-106 doi: 10.1093/occmed/kqm141[published Online First: 25 Jan 2008].
- 16  
17 36. Zwaanswijk M, Van der Ende J, Verhaak PF, et al. Factors associated with adolescent mental health service need and utilization. *Journal of the American Academy of Child and Adolescent Psychiatry* 2003;**42**(6):692-700 doi: 10.1097/01.CHI.0000046862.56865.B7[published Online First: 19 Aug 2003].
- 18  
19 37. Barker G, Olukoya A, Aggleton P. Young people, social support and help-seeking. *International journal of adolescent medicine and health* 2005;**17**(4):315-35.
- 20  
21 38. Price MN, Hyde JS. When two isn't better than one: predictors of early sexual activity in adolescence using a cumulative risk model. *Journal of youth and adolescence* 2009;**38**(8):1059-71 .
- 22  
23 39. Brown LK, Hadley W, Stewart A, et al. Psychiatric disorders and sexual risk among adolescents in mental health treatment. *Journal of consulting and clinical psychology* 2010;**78**(4):590-7 doi: 10.1037/a0019632[published Online First: 28 Jul 2010].
- 24  
25 40. Kerns SE, Pullmann MD, Walker SC, et al. Adolescent use of school-based health centers and high school dropout. *Archives of pediatrics & adolescent medicine* 2011;**165**(7):617-23 .
- 26  
27 41. Zachrisson HD, Rodje K, Mykletun A. Utilization of health services in relation to mental health problems in adolescents: a population based survey. *BMC public health* 2006;**6**:34 doi: 10.1186/1471-2458-6-34[published Online First: 17 Febr 2006].
- 28  
29 42. Marcell AV, Klein JD, Fischer I, et al. Male adolescent use of health care services: where are the boys? *The Journal of adolescent health : official publication of the Society for Adolescent Medicine* 2002;**30**(1):35-43.
- 30  
31 43. Biddle L, Gunnell D, Sharp D, et al. Factors influencing help seeking in mentally distressed young adults: a cross-sectional survey. *The British journal of general practice : the journal of the Royal College of General Practitioners* 2004;**54**(501):248-53.
- 32  
33 44. Haavet OR, Straand J, Hjortdahl P, et al. Do negative life experiences predict the health-care-seeking of adolescents? A study of 10th-year students in Oslo, Norway. *The Journal of adolescent health : official publication of the Society for Adolescent Medicine* 2005;**37**(2):128-34 doi: 10.1016/j.jadohealth.2004.08.031[published Online First: 20 Jul 2005].
- 34  
35 45. Santelli J, Klein J, Graff C, et al. Reliability in adolescent reporting of clinician counseling, health care use, and health behaviors. *Medical care* 2002;**40**(1):26-37.
- 36  
37  
38  
39  
40  
41  
42  
43  
44  
45  
46  
47  
48  
49  
50  
51  
52  
53  
54  
55  
56  
57  
58  
59  
60
